# Supplementary material for: Genetic affinities between an ancient Greek colony and its metropolis: the case of Amvrakia in western Greece
Source: Research Square preprint supplement (doi:10.21203/rs.3.rs-5069671/v1), 2025-11-01
Supplement: Supplementary file 1 [file 8f3ae76811dd2ac2515fbe91.pdf]

# Genetic affinities between an ancient Greek colony and its metropolis: the case of Amvrakia in western Greece

*Nikolaos Psonis, Eugenia Tabakaki, Despoina Vassou, Stefanos Papadantonakis, Angelos Souleles, Argyro Nafplioti, Georgios Kousis Tsampazis, Angeliki Papadopoulou, Kiriakos Xanthopoulos, Panagiotis Panailidis, Ioannis Christidis, Michael Ioannou, Angeliki Georgiadou, Dimitra Papakosta, Sevasti Koursioti, Maria Evangelinou, Athanasios Arkoumanis, Theodora Kontogianni, Varvara Papadopoulou, Paraskevi Evageloglou, Eleni Korka, Alexandros Stamatakis, Nikos Poulakakis, Christina Papageorgopoulou, Pavlos Pavlidis.*

## Supplementary Information

### Table of Contents

|                                                                                  |    |
|----------------------------------------------------------------------------------|----|
| 1. Archaeological Background                                                     | 3  |
| 1.1. Ancient Greek Colonization                                                  | 3  |
| 1.2. Corinthian colonization                                                     | 5  |
| 1.3 The colony of Amvrakia                                                       | 5  |
| 1.4 Tenea as a proxy for Ancient Corinthian ancestry                             | 7  |
| 2. Archaeological and anthropological context of sampled individuals             | 10 |
| 2.1 Amvrakia cemeteries                                                          | 10 |
| 2.1.1 Graves associated with the deep-sequenced individuals of the present study | 12 |
| 2.2. Ammotopos - "Kokkino Lithari" site                                          | 25 |
| 2.3. Cemeteries of Tenea                                                         | 27 |
| 3. Ancient DNA Analysis                                                          | 40 |
| 3.1 Sample Preparation                                                           | 40 |
| 3.2 Read Processing, Damage estimation, Genetic sex determination                | 42 |
| 3.2.1 Analyses at the FastQ level                                                | 43 |
| 3.2.2 Analyses at the library level                                              | 44 |
| 3.2.3 Analyses at the individual level                                           | 45 |
| 3.3 Contamination estimation                                                     | 47 |
| 3.4 Uniparental haplogroup estimation                                            | 49 |
| 3.4.1 mtDNA                                                                      | 49 |
| 3.4.2 Y-chromosome                                                               | 50 |
| 3.5 Population Genomics analysis                                                 | 51 |
| 3.5.1 Lists of genomic sites                                                     | 51 |
| 3.5.2 Genotype calling and pseudohaploidization                                  | 51 |
| 3.5.3 Genetic relatedness analysis                                               | 52 |

|    |                                                                                        |     |
|----|----------------------------------------------------------------------------------------|-----|
| 39 | 3.5.4 Runs of homozygosity                                                             | 56  |
| 40 | 3.5.5 Imputation and Identity-by-Descent segments screening                            | 56  |
| 41 | 3.5.6 Merging with public data                                                         | 58  |
| 42 | 3.5.7 Principal Component Analysis                                                     | 59  |
| 43 | 3.5.8 Population clustering analysis (ADMIXTURE)                                       | 62  |
| 44 | 3.5.9 f3 Statistics and Ancestry Proportion Analysis (qpAdm)                           | 74  |
| 45 | 3.6 Phenotypes                                                                         | 103 |
| 46 | 3.6.1. Pigmentation                                                                    | 103 |
| 47 | 3.6.2. Monogenic Phenotypes                                                            | 103 |
| 48 | 3.7 Microbial Metagenomics                                                             | 105 |
| 49 | 3.8 Visualization                                                                      | 106 |
| 50 | 4. Provenance, mobility and diet analysis using stable isotopes                        | 107 |
| 51 | 4.1 Strontium isotope ratio analysis of bioarchaeological skeletal remains: principles | 107 |
| 52 | 4.2 Geological context of the study area                                               | 108 |
| 53 | 4.3 Materials and Methods                                                              | 110 |
| 54 | 4.3.1 Samples                                                                          | 110 |
| 55 | 4.3.2 Sample preparation and analysis                                                  | 110 |
| 56 | 4.4 Results and Discussion                                                             | 110 |
| 57 | 5. Supplementary Information References                                                | 112 |
| 58 |                                                                                        |     |
| 59 |                                                                                        |     |

# 1. Archaeological Background

*Eugenia Tabakaki, Christina Papageorgopoulou, Aggeliki Georgiadou, Elena Korka, Paraskevi Evaggeloglou, Ioannis Christidis, Michael Ioannou, Panagiotis Panailidis*

## 1.1. Ancient Greek Colonization

Migrations are ubiquitous in human history. From the great out-of-Africa journey, over the Neolithic demographic transition, and up to present times, there has been a constant flow of migratory waves across the planet.

An important outcome of migratory expeditions and local interactions is the ancient Greek civilization, a period of political, philosophical, artistic, and scientific achievements that formed a legacy with substantial influence on Western civilization. Having its roots in the post-Mycenaean era usually described as the Greek Dark Ages, it is almost universally recognised that it started to take shape during the Archaic period (c. 800-479 BCE), as an outcome of migratory movements and interactions in the Mediterranean and the Black Sea, known as ancient Greek colonization.

The Ancient Greek Colonization started during the 8th century BCE. During this period, *poleis*<sup>1</sup> (cities) in continental Greece, the Aegean, and along the coast of Asia Minor initiated colonization campaigns, both towards the West, including western Greece, southern Italy, Sicily, south France, and Spain, and towards the East, expanding from the northern Aegean coast and the islands, all the way to the Black Sea [3–7]. In particular, the northern Aegean and north-western Greece were heavily colonized by major Euboean centers, Corinth, the Cycladic islands, and Ionian cities. At present more than 100 colonies from Amvrakia and Corcyra to Chalcidice, the Thermaic Gulf, and further East to the Thracian coast and the islands of Thasos and Samothrace are known. The Colonisation of the Black Sea was initially undertaken by the Greek cities of Asia Minor under the leading role of Miletus and until the end of the 6th century BCE when the Athenian expansion policy began to overshadow all other attempts in the area with a record breaking 200 colonies [7,8].

Ancient Greeks used the word *apoikia* (Αποικία), a term that may best be translated as "home away from home", predominantly emphasizing the separation, but also the

---

<sup>1</sup> The central focus of civilization for the Greeks, after the oikos or family unit, was the polis (plural: poleis). Polis is usually translated as 'city-state', as polis was generally an independent state, with its own laws, customs, political system, military force, currency and sometimes calendar. According to Aristotle those who did not live in a polis were 'tribeless, lawless, heartless', and to the Greeks the fact that they lived in a city-state was proof that they were a civilized people. But the polis should also in Aristotle's opinion be limited in size and self-sufficient [1]. The concept of the polis mattered to the Greeks. They did not just live in poleis, they found it important to live in poleis rather than in some other form of political community. Every Greek colony was founded as a polis or became a polis not long after its foundation. Nevertheless, no one has ever investigated how many poleis there were and which settlements were actually poleis. For the colonies there is no comprehensive study at all. The polis and the concept of polis have been investigated either in general or in relation to one individual polis. The general studies are mostly based on sources relating to Athens, and most of the individual studies deal with the Athenian democratic polis of the Classical period or with Archaic and Classical Sparta [2].

connection between the *metropolis*<sup>2</sup> ("mother city") and the new *oikos*<sup>3</sup> [9]. The colonies were usually sovereign states and not dominions. Therefore scholars emphasize the misleading connotation of the term "colonization" compared to the modern colonial era [10,11]. The relationships between the metropolises and colonies were bidirectional and typically beneficial for both entities. In some cases, the colonies outperformed the metropolises with respect to cultural and political developments. Each colony had its individual history and founding myth, colonies of its own, allies, and special ties to the metropolis. Despite these distinct profiles, common features are observed among the foundation myths of most colonies, such as the substantial role of the Delphic oracle in indicating new lands; the figure of the *oikistes*, the divine or mortal hero whose name was often given to the colony and may have led the group of settlers; the foundation of the first sanctuaries and the determination of the social order following the *nomima* (the laws and traditions of the metropolis) [12]. Based on these data, archaeologists and historians identify a colony *vis-à-vis* the metropolis, although this connection is not always straightforward.

Their search for new homes was instigated for a plethora of reasons: internal strife, social conflicts, political strategies, famine or poverty, a quest for better opportunities. *Emporia* (trading posts) were in some cases the predecessors of colonies. Yet, starting in the mid-8th century BCE the Greek *poleis* (city-states), as well as regional or ethnic groups started to expand with more targeted, longer-term intentions. The founding of hundreds of new cities, within a wide and geographically diverse range, the interaction of the settlers with heterogeneous indigenous populations, and the relatively short time in which the colonies evolved into major cultural, commercial, and political centers indicates that Greek Colonization constitutes one of the most influential phenomena in European ancient history and archaeology.

Although numerous colonies have been excavated, the debate surrounding the mode, intensity, and pace of these migratory movements [e.g. 13,14] remains unresolved. Were these movements more akin to a gradual drift, or did they represent an organized colonization effort? Can we reliably identify biological, linguistic, religious, cultural, or social groups whose origins might have been as much a product of invented founding myths as of reality? What role did the local populations play—were they assimilated or differentiated? The settlement

---

<sup>2</sup> The Greek colonization is temporally and causally connected with the very creation of the Greek city as an organized city - urban community of citizens. We can not actually date the birth of the city state. The oldest legal text of Greek antiquity, an inscription of the Cretan Dreros (c. 630 BCE), presupposes the existence of the city in the sense of the city-state. The term "metropolis" itself implies the existence of a city. In Greek "metropolis" meant the "mother city" and refers to the relationship between cities and colonies. The term metropolis has a highly complex definition. The 'mother-city' of a Greek colony (*apoikia*) usually nominated the founder (*oikistēs*), conducted rituals of divination and departure, organized a body of settlers, and formulated the charter of their individual status [4].

<sup>3</sup> The term "Oikos" in ancient Greece did not mean only "house", as it does today, nor did it denote only a family (i.e. the sum of the members of a group of people who are connected by family ties). The *oikos*, as Aristotle says in his *Politics*, was the smallest unit, the smallest component of society; of course, especially in archaic societies, the *oikos* was also linked to the possession of land (this was no longer necessarily true in societies such as 5th century Athens, with its developed commercial and craft economy). The characteristic of the house, however, at the ideological level, was that it had a continuity through time, it had a past (the ancestors) and a future (the descendants). Therefore, it was the duty of every adult male to respect the past of his house and to ensure its continuity into the future. Therefore, the social attitude and ethics of each man had consequences not only individually, but also in terms of the maintenance and preservation of the prestige of his house.



nuclei likely attracted many others, possibly including local women. But what was their role? Many of these pressing questions are anthropological and population genetic in nature, and they have been only partially addressed to date.

## 1.2. Corinthian colonization

Colonization was not a flight into the unknown, but the creation of a stable network of economic and political ties [15,16]. This is particularly evident in the case of Corinth, which grew into a powerful metropolitan city through the foundation of colonies and trading posts across the Mediterranean (Corcyra, Leukas, Syracuse), the Adriatic (Epidamnus, Apollonia), the Aegean (Potidaea in Chalcidice), and mainland Greece (Amvrakia). Historical texts and archaeological evidence (artifacts, burials, grave goods, coins) reveal the substantial influence of Corinth on the colonies' lifestyle and economy [17–19]. Based on its colonies, Corinth developed a trade route, from the Saronic Sea, through the Corinthian Gulf, along the western coasts of Sterea Ellada (geographical unit of modern-day Greece), Epirus, and the Adriatic to Sicily [20]. The main trading stations (and colonies at the same time) were Anactorion, Ithaca, Lefkas, Corcyra [21], Amvrakia [18,22], Apollonia [22,23], and Epidamnus [22].

Through this network, Corinth established a dominance in the West, as observed by Thucydides. Within a generation after the foundation of Syracuse, by about 700 BCE, Corinth monopolized the western trade. This is substantiated by the archaeological findings of Corinthian origin covering the end of the 8th century BCE and the beginning of the 7th century BCE in the West that exceed the findings from all other Greek poleis combined [24]. Corinth exported pottery, textiles, metalwork, ivory-carving, sculpture, and imported grain, as well as the raw materials it lacked. During this period, the Corinthian architectural style experienced a new phase of rapid commercial development.

Overall, the city of Corinth was an active and competitive metropolis in Archaic times and had intense relations with the cities it founded. The colonies remained under Corinthian control, that is, having their coins minted in Corinth as late as the fifth century BCE. However, there also existed conflicts between the metropolis and its colonies. The dispute between the Corinthians and Corcyraeans in the mid of the 5th century BCE over the control of Epidamnus is a representative example [25].

Corinth contributed to the history of the ancient Mediterranean world through the foundation of its colonies, some of which evolved into major cities of the ancient and modern world.

## 1.3 The colony of Amvrakia

Amvrakia (also known as Ambracia) was founded by Corinth during the last half of the 7th century BCE on the banks of the river Arachthos [26] and at a short distance from the northern coast of the Amvrakian Gulf [22]. Already in the 8th century BCE, before the formal establishment of the colony, Corinth had established a trading post to support the wide trade network it had developed along the Ionian and Adriatic coasts. Individual burials found in the northern part of the city confirm this [27].

Amvrakia was founded on an important crossroad that connected southern Greece with the mainland of Epirus and reached as far as Apollonia, another Corinthian colony on the eastern Adriatic coast. Amvrakia had access to maritime trade routes through the Arachthos river. In the area of the Amvrakian Gulf, Corinth had also founded the colonies of Lefkada,

Anaktorion, and Sollion known as the “sister-cities” of Amvrakia. They all formed part of the Corinthian trade network.

According to the foundation myth, the Corinthians, led by Gorgos (oikistes), son of Cypselos, the tyrant of Corinth, founded a colony on the banks of the Arachthos river [28]. The foundation of Amvrakia, is evidenced by the strong presence of the metropolis in the material culture of the ancient city. The archaeological, epigraphic, and numismatic finds indicate that there was a strong relationship between the colony and its metropolis. Amvrakia strengthened Corinth's economic influence and commercial control in northwestern Greece. This colony, situated at the verge of the Hellenic world, was the connecting link that united the Greek city-states, especially in the Epirus-Illyrian region.

Based on archaeological evidence, the latter archaic city of Amvrakia had strong fortifications protecting the city, and was centrally planned and organized. The city was built according to a geometric urban masterplan. Streets of N-S direction intersected with avenues creating residential blocks. Each urban block measured 150 × 30 m and contained about twenty houses. This urban organization remained unchanged throughout the centuries. Each house, following the principles of isometry and isonomy had the same dimensions (approximately 15 × 15 m). The urban plan of Amvrakia dedicated the north-western part of the town to the public life of the town [29]. The administrative and religious center with monumental public buildings and temples was located in the north-western part of the city. Private residences of the classical and Hellenistic periods had almost identical shapes with those of the archaic period. Successive phases of the private houses of the Archaic, Classical, and Hellenistic periods are a common place in Amvrakia. This means that life continued uninterrupted in the city.

During the 6th century BCE, the city developed demographically and politically and transitioned from tyranny to a form of representative democracy. In 582 BCE, it acquired a democratic constitution by rebelling against the tyrants as stated by Aristotle [30]. In the 5th century BCE, the city minted its own coins following the Corinthian model.

The Amvrakians took part in the Persian Wars and the Peloponnesian War supporting the metropolis of Corinth. The prime of Amvrakia was during the Hellenistic period under the reign of Pyrrhus, the King of Epirus (c. 319-272 BCE). In 295 BCE, Pyrrhus established Amvrakia as the capital of his kingdom. Representative public and private buildings and spaces constituted a model city that provided a good quality of life to its citizens until the conquest by the Romans under Aemilius Paulus in 167 BCE. Amvrakia declined in 31 BCE, when the residents were forced to populate the neighboring Nicopolis, which was a city founded by Octavian Augustus [31].

## 1.4 Tenea as a proxy for Ancient Corinthian ancestry

Tenea was an important settlement located in the eastern periphery of Corinth at a key strategic position controlling Kontoporeia, the shortest path leading from Corinth to Mycenae and Argos (**Supplementary Figure S1**). For many centuries, Tenea was the largest and most important “*Kome*<sup>4</sup>” (town) in the eastern region of Corinth. The status of Tenea as Kome was different to that of the independent polis. It was a community or settlement, in the Dorian Peloponnese, which joined forces [2].

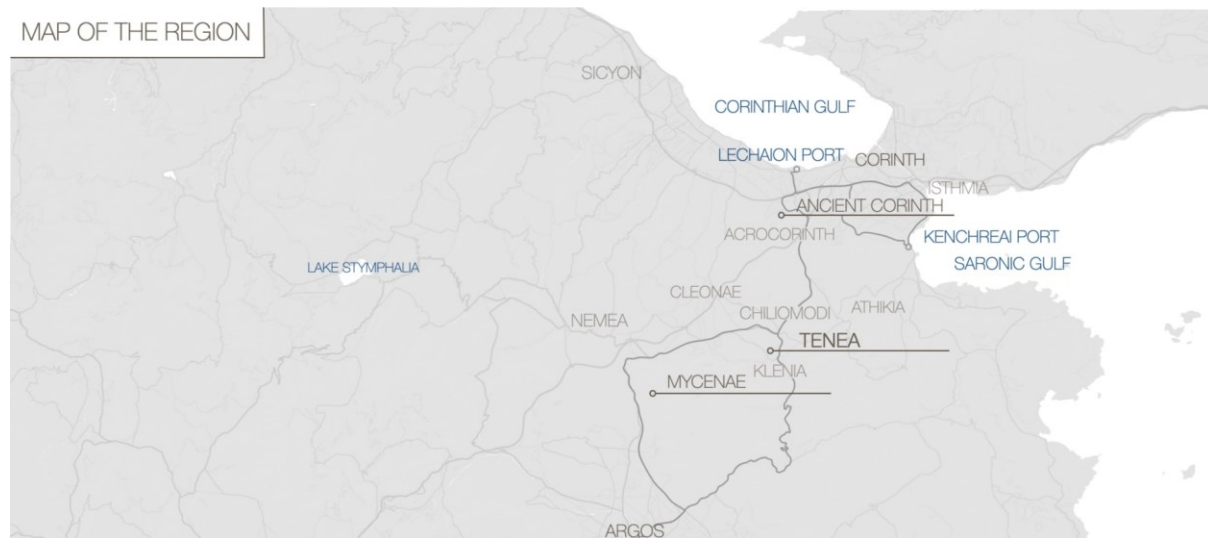

**Supplementary Figure S1.** Map of the Corinthia region, with the respective location of Tenea and Ancient Corinth.

The city is mentioned in Strabo [1] and Pausanias [2]. Strabo provides more information on Tenea than almost all the smaller towns of the Peloponnese, which emphasizes its importance [32]. According to written sources, Tenea was the place where Oedipus was brought up in the summer palace of Polybus, king of Corinth. In the Archaic and Classical periods, the Greek city of Tenea in Corinthia was part of the city-state of Corinth. Wiseman [33] mentions “Citizens of all the towns of the Korinthia evidently considered themselves, throughout most of the antiquity citizens of Corinth”. Tenea developed substantially, and, in the 8th century BCE, a large part of its population actively participated in the Greek colonization under Corinth. Together with Corinth, the two cities provide an example of a common colonization. For instance, in 734 BCE, residents of Tenea participated in the colonization of Syracuse led by Archias from Corinth [16]. During this period, although being under the direct influence of Corinth, Tenea had already evolved into a populous and

<sup>4</sup> The status of kome is different to that of the independent polis. It is a form of community, “municipality” or “village”, but not as developed and valuable as the polis, which is the perfect form of human society. We hear about komai in the Dorian Peloponnese, in some parts of central and western Greece, in Makedonia and Thrace and along the west coast of Asia Minor. It is believed that the term kome was Dorian, whereas the term demos was used in the non-Dorian parts of Hellas. Kome is more a notion of how the Greeks designated and classified settlements that were not Poleis. The overlap between the two terms seems to occur principally when kome is used in a political sense about a subdivision of a larger polis [2].

prosperous city with an extensive region, *Teneatis*<sup>5</sup>, which is confirmed by the latest archaeological evidence. The participation of Tenea in the colonization of Syracuse shows that it was a well-developed city and that the colonization contributed decisively to the prosperity of its society, due to the commercial contacts that were developed. Tenea had always had a tendency for independence. During Hellenistic times, Tenea attempted unsuccessfully to gain autonomy from the Corinthians by minting its own currency [34]. Only during the late Hellenistic period, Tenea became a free city in the sense that it had its own government and was not under Corinthian authority any more. Its development, however, attained its peak during the Roman period, since it was the only city of Corinth that was not destroyed by the Romans [35]. This political status appears to have been maintained by the Romans after they had conquered Greece. According to Pausanias: "The inhabitants (of Tenea) say that they are Trojans who were taken prisoners in Tenedos by the Greeks, and were permitted by Agamemnon to dwell in their present home". The common Trojan mythical origin of the residents of Tenea and the Romans, from the lineage of Tennes, king of Tenedos, and the trojan hero Aeneas [22], seems to have created a strong link between them. The city was favored by the Romans, not only because of their supposed common ancestry from Troy but also because of its support for them during the war against the Achaean League. The myth of common ancestry came to help and justified the Roman decision. The earliest reference to Tenea being independent from Corinth, sometime before 146 BCE, is by Strabo who claims that the city had already gained independence when it joined the Romans against Corinth in that year: "Tenea prospered more than the other settlements (in Corinthia), and finally even had a government of its own, and, revolting from the Corinthians, joined the Romans, and endured after the destruction of Corinth". Tenea remained an important center during the Roman era, until the 6th century CE, when it was abandoned due to the raids of the Avaro-Slavs.

Today, systematic archaeological research<sup>6</sup> conducted in the area gradually reveals aspects of the ancient city. In general, the first results of the research show rich and remarkable activity in Tenea from the Archaic to the late Roman times. However, the oldest settlement evidence in the area dates to the Early Bronze Age. During excavations, remains of the Early Helladic period were revealed, such as a built ritual deposit that is about four meters deep, as well as part of the Early Helladic settlement, which came to light for the first time. The discovery of evidence for Early Helladic habitation in the area confirms the strategic importance of the site over the course of centuries. New findings from prehistoric Corinth and other prehistoric settlements around Tenea, help us gain new insights regarding the area between the modern towns of Chiliomodi and Klenia before the Greek colonization of Sicily and Southern Italy. It is worth noting the strong presence of imported pottery from Aegina, Attica, Argolis, Corinth, and the Cyclades, which indicates the contacts Tenea had developed with distant regions.

All the above evidence that has been uncovered in the context of the project prove that Tenea was indeed a developed area, with significant activity from the prehistoric to the late Roman period. The participation of Tenea at the colonization of Syracuse supports the

---

<sup>5</sup> Teneatis included the present-day villages of Stefani, Agios Vasileios, Athikia, Mapsos, Koutalas, Agionori, and Spathovouni.

<sup>6</sup> The archaeological program, known as "Tenea Project", is the first systematic archaeological research in the region of ancient Tenea and is being conducted since 2013 under the direction of Dr. Elena Korka, implemented by the Directorate of Prehistoric and Classical Antiquities of the Hellenic Ministry of Culture. It is also supported by an interdisciplinary team in the context of various scientific collaborations with Greek academic institutions.

262 observation that the city was in a state of economic, demographic, and cultural prosperity [36].  
263 Regarding the colonization of Amvrakia, there is no ancient text or other source or inscriptions  
264 indicating that the people of Tenea were actively involved in the colonization process.  
265 However, as Tenea was a *kome* of Corinth, belongs to the region of Corinthia and has  
266 participated in its colonization efforts, therefore we can also not exclude their presence in the  
267 foundation of Amvrakia either.

268

269

## 2. Archaeological and anthropological context of sampled individuals

*Eugenia Tabakaki, Aggeliki Georgiadou, Kiriakos Xanthopoulos, Panagiotis Panailidis, Dimitra Papakosta, Varvara Papadopoulou, Elena Korka, Paraskevi Evaggeloglou, Ioannis Christidis, Michael Ioannou, Theodora Kontogianni, Arkoumanis Athanasios*

### 2.1 Amvrakia cemeteries

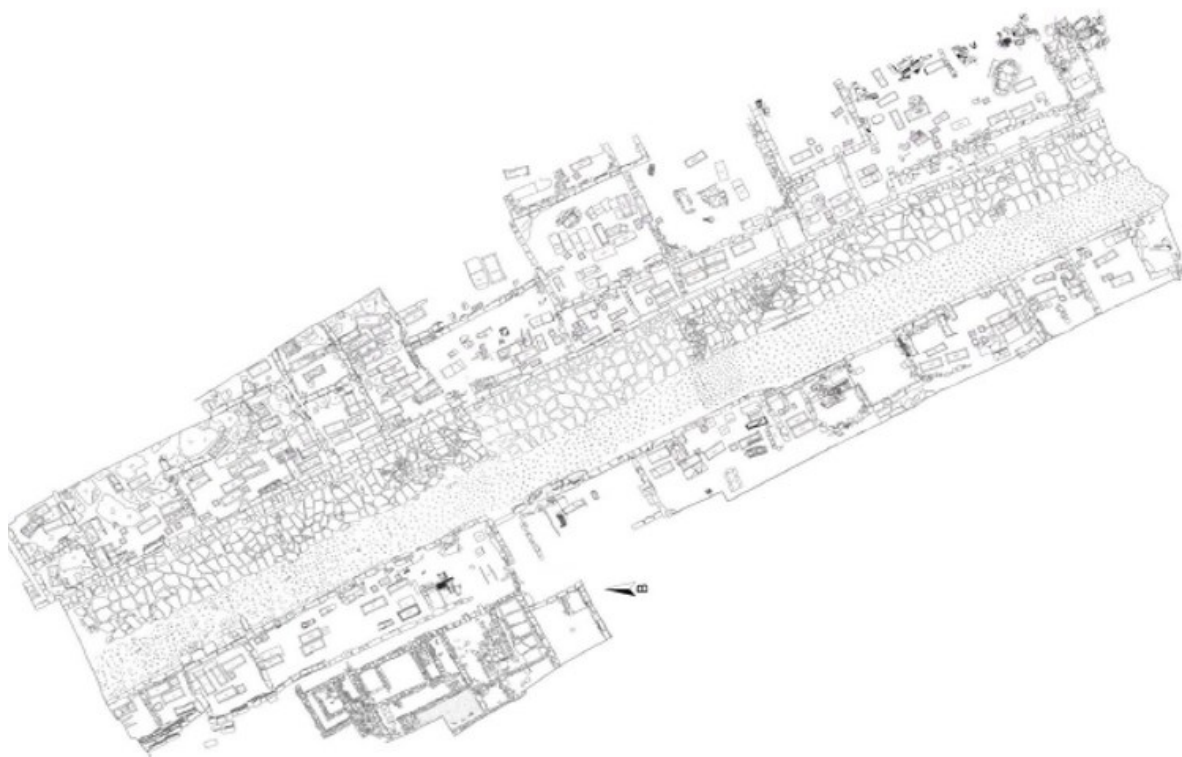

**Supplementary Figure S2.** The western cemetery of Ancient Amvrakia. Image(s) source: Archive of the Ephorate of Antiquities of Arta, Ministry of Culture, Greece.

The earliest burial evidence dates back to the 8th-7th century BCE, before the official foundation of the city as a Corinthian colony. Individual burials in jars found in the northern part of the city date back to this period. From the 6th century BCE onwards, the two cemeteries of the city were organized in areas outside the city walls, namely on the eastern and south-western fringes of the Peranthis hill.

The southwestern cemetery (**Supplementary Figure S2**) was larger and better organized [37]. A monumental road, which started from the southern gate of the city wall and led to the port in the Amvrakian Gulf, traversed it. This 10-12 m wide road was paved in its

288 eastern part with an elevated pavement, while in its western part it was made of simpler  
289 materials. On either side of the avenue, there were retaining limestone walls with elaborate  
290 carving, which defined the fronts of the square enclosures (periboloi). The most monumental  
291 enclosure was the "Polyandron" (a cenotaph), erected by the city of Amvrakia in honor of its  
292 dead warriors.

293 The enclosures contained a large number of burials, dating from the 6th century BCE  
294 to the early Roman period. The arrangement of the tombs inside the "periboloi" is very dense  
295 and testifies the intensive use of the necropolis until the late Hellenistic period. The Π-shaped  
296 burial enclosures, bearing facades, contained various cist, tile-covered, and pit graves,  
297 sarcophagi, as well as burial cases with copper or clay vessels holding the remains of the  
298 cremations. In many cases, the Hellenistic tombs are found on the cist graves and burial cist  
299 cases of the Classical era [27].

300 The cemetery took its final form during the late Classical and especially the Hellenistic  
301 period. Graves were made for one individual with some exceptions that contained two burials.  
302 During the Hellenistic period reusing the graves became common practice. These graves were  
303 probably used by extended families. Numerous burial offerings were placed in the tombs. A  
304 total of 700 graves have been investigated in the Necropolis [26].

305 In Amvrakia, inhumation was the most common practice and cremation was very  
306 limited. It appears that all the dead were buried in an extended posture, with the hands parallel  
307 to their body. The orientation rule is N-S and the head of the deceased is placed toward the  
308 south. In general, the predominant tomb type is the cist grave, in different variations. More  
309 than half of the graves are of the cist type. The limestone cist graves were also used as family  
310 tombs. In many cases they contained more than one burial, that is, the bones of the older  
311 burials were set aside for the new burial. In some cases, the graves also contained cremation  
312 urns or vessels. Porous sarcophagi have also been excavated, but they do not represent the  
313 common burial type.

314 During the last period of the Archaic era, especially the years 500-480 BCE, the  
315 number of burials in both cemeteries of the city increased substantially. The majority of adult  
316 burials are accompanied by at least one drinking vessel as grave goods.

317 The cemeteries of Amvrakia are different in comparison with the Epirus hinterland,  
318 (tombs in the valley of Gormos in Pogoni, Vitsa in Zagori, Liatovouni in Konitsa, and Dourouti  
319 Ioannina). In some cases in Epirus, tumuli had been erected (covering a period: LBA - 3rd  
320 century BCE), but never became the main burial monument type. So far, they are only found  
321 in two areas, Ephyra and Pogoni [38]. The construction of tumuli, is linked with symbolic acts  
322 that promote and maintain the collective identity and continuity of preceding communities. [39].

323 In other cases, graves were often arranged in clusters, while in some cases the graves  
324 were arranged around a particular burial. The Amvrakia cemeteries do not appear to follow  
325 the conservatism of the burial customs of Epirus, which exhibits a lack of innovations. The  
326 simple grave types in the Epirus hinterland and the absence of grave markers are in contrast  
327 to the cemeteries of Amvrakia. It is therefore obvious that Amvrakia adopted the burial  
328 customs of southern Greece, such as those of Corinth and Athens. The Amvrakia burial  
329 customs of the 6th century BCE follow those of the metropolis. Yet, during the early colonial  
330 stages of Amvrakia it appears that burial customs were still different from those of the  
331 metropolis [40].

332 The eastern cemetery of the city was smaller in size than the western one. The plots  
333 that have been investigated in the eastern cemetery are scattered. Therefore we do not have  
334 the comprehensive picture we do have for the western cemetery. The eastern cemetery did  
335 not have the monumentality that the western cemetery had acquired, at least during the Late

Classical period. It had a 6m wide burial street with burial enclosures on both sides and a paved pavement along the eastern side [41]. The archaeological research from the beginning of the 20th century to the present day has revealed a large section of the Amvrakia eastern cemetery, with burials dating from the Late Archaic, Classical, and Hellenistic periods. This proves the continuous use and functionality of the burial site. Most graves are cist-shaped, followed by the pit graves, and the small cist-cases. The absence of graves dating to the late Hellenistic period indicates the progressive abandonment of the eastern cemetery [42].

Particularly important evidence in modern research are the funerary stelae of Amvrakia, one of the largest sets of inscribed monuments we have to date in northwestern Greece. Most of the stelae come from the western cemetery; numerically fewer are those from the eastern cemetery [43].

## 2.1.1 Graves associated with the deep-sequenced individuals of the present study

### Archaic period

**-Grave CVII:** The limestone cist-grave CVII, oriented north-south, was located at southwestern cemetery of Amvrakia (Theodorou plot) and it was excavated on 19/08/1997 in trench D2. The grave is of small dimensions and measures approximately: 2.00 × 0.65 × 0.64 m. The floor of the cist tomb is paved with gravel and mud. The opening was covered by a large limestone slab. The grave was reused. It contained a primary (orientation N-S; Anthro ID 5) and a secondary burial (Anthro ID 781), each of one individual. The primary burial was an adult individual (18-50 years old) with undetermined sex (after macroscopic estimation). The secondary burial (earlier remains) was pushed to the sides of the cist when the grave was reopened. No grave goods were found, but a fragmented iron nail was discovered. There is no direct dating, as the chronology is mostly based upon ceramics. The burials were dated to the late Archaic period, second half of the 6th century BCE (ca. 550-500 BCE).  
Deep-sequenced individual: Individual A (primary burial), **Amv\_Epi\_Arch\_1**.



**-Grave LXIX:** Pithos (storage vessel) subadult (infant) burial (**Supplementary Figure S3**). The pithos was located in the burial enclosure γ, southwestern cemetery of Amvrakia (Kommenos plot) and it was excavated on 04/10/2011. The pottery vessel is undecorated and was found in a vertical position at a depth of 12.62 m from the surface. The pithos contained a single inhumation of an infant (Anthro ID 267). The pithos was fragmented. Four ceramic pots were found in situ. Three of them were Corinthian imports and the kyathos was probably made by an Amvrakian workshop [40]. The burial was dated to the late Archaic period, third quarter of the 6th century BCE (ca. 550-525 BCE). It is worth mentioning that the burial of adults in pithoi did not occur in the burial customs of Corinth. This seems to be a practice of the local population before colonization. Lefkada and Corfu, also Corinthian colonies, buried their dead in pithoi as a common practice in northwestern Greece in pre-colonial times. Deep-sequenced individual: **Amv\_Epi\_Arch\_1**.

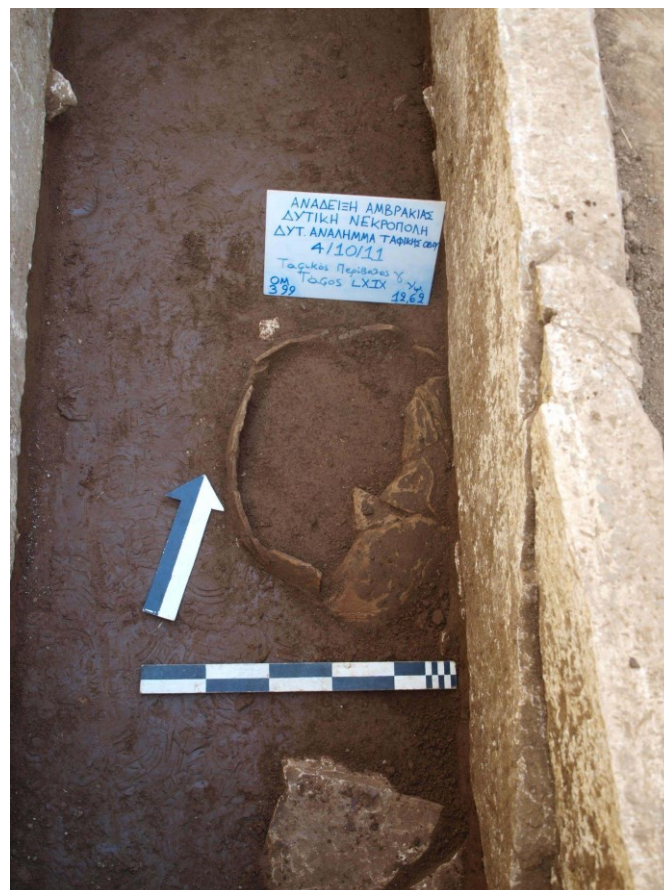

**Supplementary Figure S3.** Grave LXIX, Western Necropolis of Amvrakia. Image(s) source: Archive of the Ephorate of Antiquities of Arta, Ministry of Culture, Greece.

**-Grave CXXVI:** The limestone cist-grave CXXVI (**Supplementary Figure S4**), oriented S-E and N-W, was located in burial enclosure E, at the southwestern cemetery of Amvrakia (Kommenos plot) and it was excavated on 25/10/2012 at a depth of 11.84 m from the surface. The grave contained two burials (I: primary - II: secondary). A burial of a 35 year old male (Anthro ID 1) and a burial of a 35-45 years old female (Anthro ID 51), were identified by the excavation team [40]. The floor of the cist tomb was paved with gravel and mud. One individual (I) was accompanied by a black-figured flask located above the right shoulder. Additionally, two bronze 'scrapers' (stleggides) for cleaning the dust and the remaining oil from their skin after training and a fragmented bronze end of a musical instrument (all offerings for the man) were found. There is no direct dating, as the chronology is based mostly upon ceramics. The burials were dated to the late Archaic period ca. 500-480 BCE.

Deep-sequenced individual: Individual I (burial I), **Amv\_Epi\_Arch\_3**.

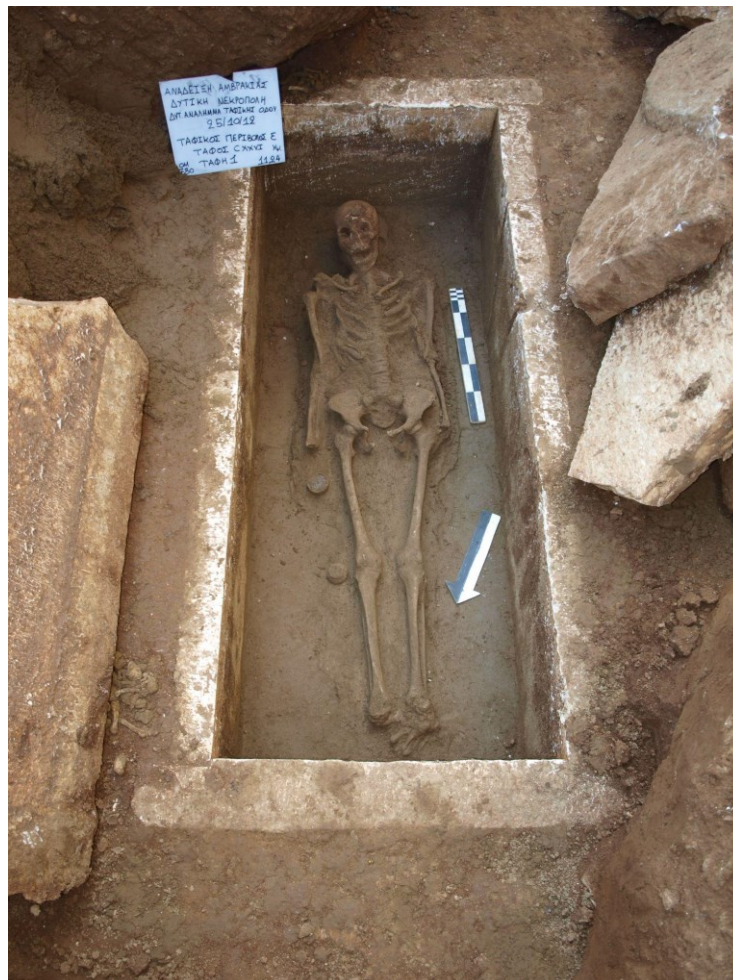

**Supplementary Figure S4.** Grave CXXVI (primary), Western Necropolis of Amvrakia. Image(s) source: Archive of the Ephorate of Antiquities of Arta, Ministry of Culture, Greece.



## Classical period

**-Grave CXIX:** The limestone cist-grave CXIX was located in burial enclosure E, at the southwestern cemetery of Amvrakia (Kommenos plot) and it was excavated on 25/09/2012, at a depth of 12.49 m from the surface. A fragmented limestone slab was found *in situ*, probably covering the grave opening. The grave was reused. It contained a primary (orientation S-N; Anthro ID 7) and a secondary burial (**Supplementary Figure S5**; Anthro ID 8), each of one individual. The earlier remains were pushed to the north side of the cist when the grave was reopened. One individual was accompanied by a kyathos (drinking-cup for wine) and two small lekythoi and a bronze ring. According to A. Aggeli, a burial of a 45-49 years old woman was found in situ. A secondary burial of a female individual over 60 years of age, with no grave goods, was also recognised [40]. There is no direct dating, as the chronology is based mostly upon ceramics. The burials were dated to the late Classical period, second quarter of the 4th century BCE (ca. 375-350 BCE).

Deep-sequenced individual: Retrieval individual (=secondary burial), **Amv\_Epi\_CI\_1**.

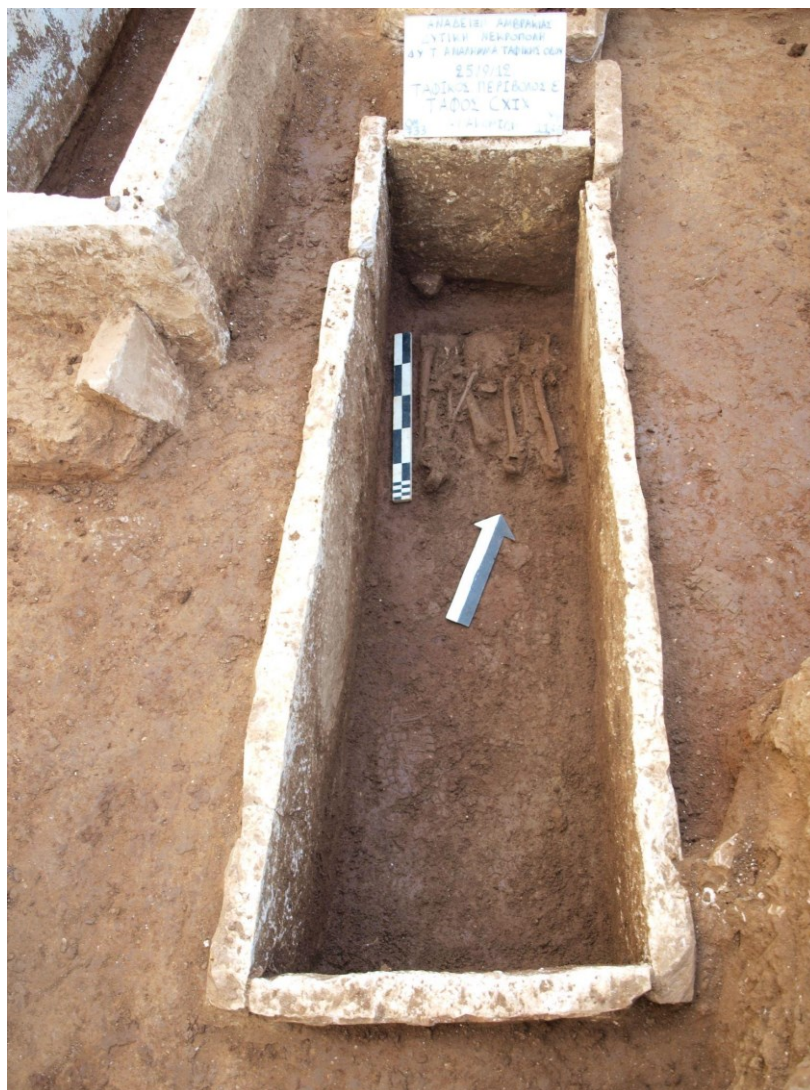

**Supplementary Figure S5.** Grave CXIX (retrieval), Western Necropolis of Amvrakia. Image(s) source: Archive of the Ephorate of Antiquities of Arta, Ministry of Culture, Greece.

**-Grave CCCXXXIX:** The limestone cist-grave CCCXXXIX (**Supplementary Figure S6**), oriented north-south, was located at the southwestern cemetery of Amvrakia (Kommenos plot) and it was excavated on 30/07/2014 in trench E18 at a depth of 14.76 m from the surface. The opening was covered by a large limestone slab. Grave CCCXXXIX, which had dimensions 1,95 m × 0,67 m, height: 0,53 m is located north of the grave CCCXXXVII. It contained two burials, each of one individual: burial I (Anthro ID 16) and II (Anthro ID 11), both with a S-N orientation. According to A. Aggeli, the main burial belonged to a female, with a poor state of skeletal preservation. The head was oriented to the south, probable age of 50 years (after macroscopic estimation). A canastron was placed at both sides of the body at the level of the neck. Underneath, of the female burial, a male burial of a young man 18-19 years old (after macroscopic estimation), in extended posture, and heading to the south, was discovered. One ceramic vessel, a black figure skyphos (drinking-cup) and two bronze 'scrapers' (stleggides) for cleaning the dust and the remaining oil from their skin after training are associated with the male burial [40]. There is no direct dating, as the chronology is based mostly upon ceramics. The burials were dated to the Classical period, third quarter of the 5th century BCE (ca. 450-425 BCE).

Deep-sequenced individual: Individual II (burial II), **Amv\_Epi\_CI\_2**.

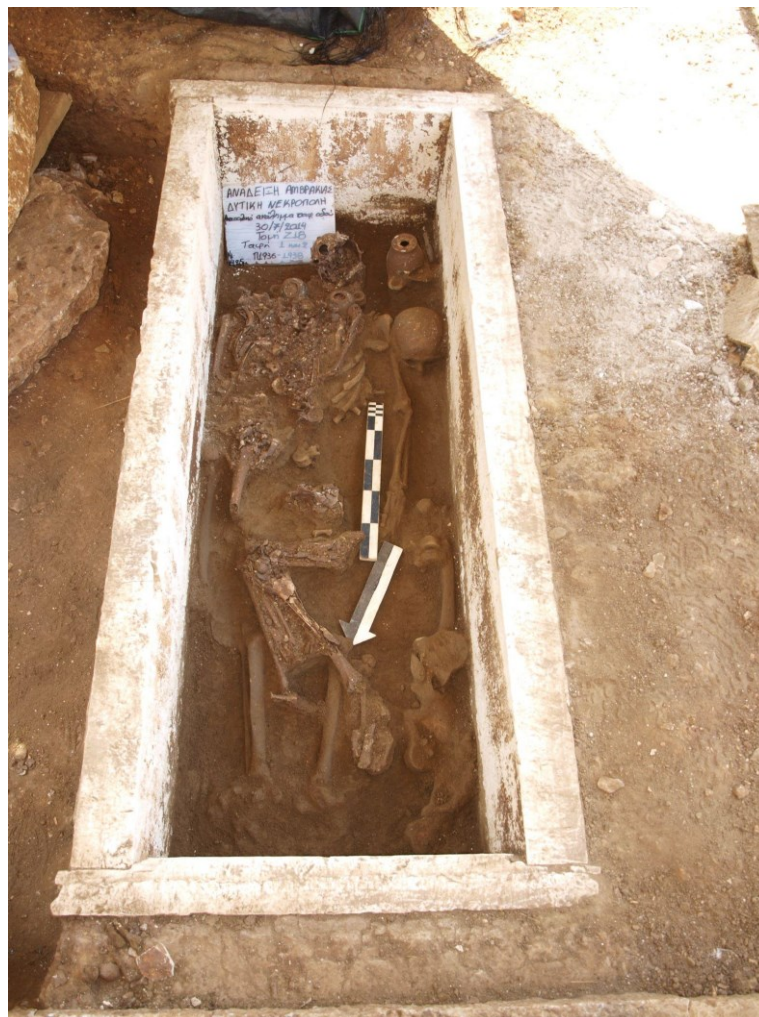

**Supplementary Figure S6.** Grave CCCXXXIX, Western Necropolis of Amvrakia. Image(s) source: Archive of the Ephorate of Antiquities of Arta, Ministry of Culture, Greece.



**-Grave CXLVII:** The limestone cist-grave CXLVII (**Supplementary Figure S7**) was located in the southwestern cemetery of Amvrakia (Kommenos plot) and it was excavated on 17/06/2013 in trench A12 at a depth of 13.25 m from the surface. A limestone slab was found *in situ*. The grave was located and partially constructed below the cist XL. The grave contained one individual (orientation SE-NW; Anthro ID 12). The individual (probably female, after macroscopic estimation) was accompanied by a red figured lekythos (oil container) and a silver coin (not well preserved)[40]. There is no direct dating, as the chronology is based mostly upon ceramics. The burials were dated to the Classical period, first quarter of the 4th century BCE (ca. 400-370 BCE).  
Deep-sequenced individual: **Amv\_Epi\_CI\_3**.

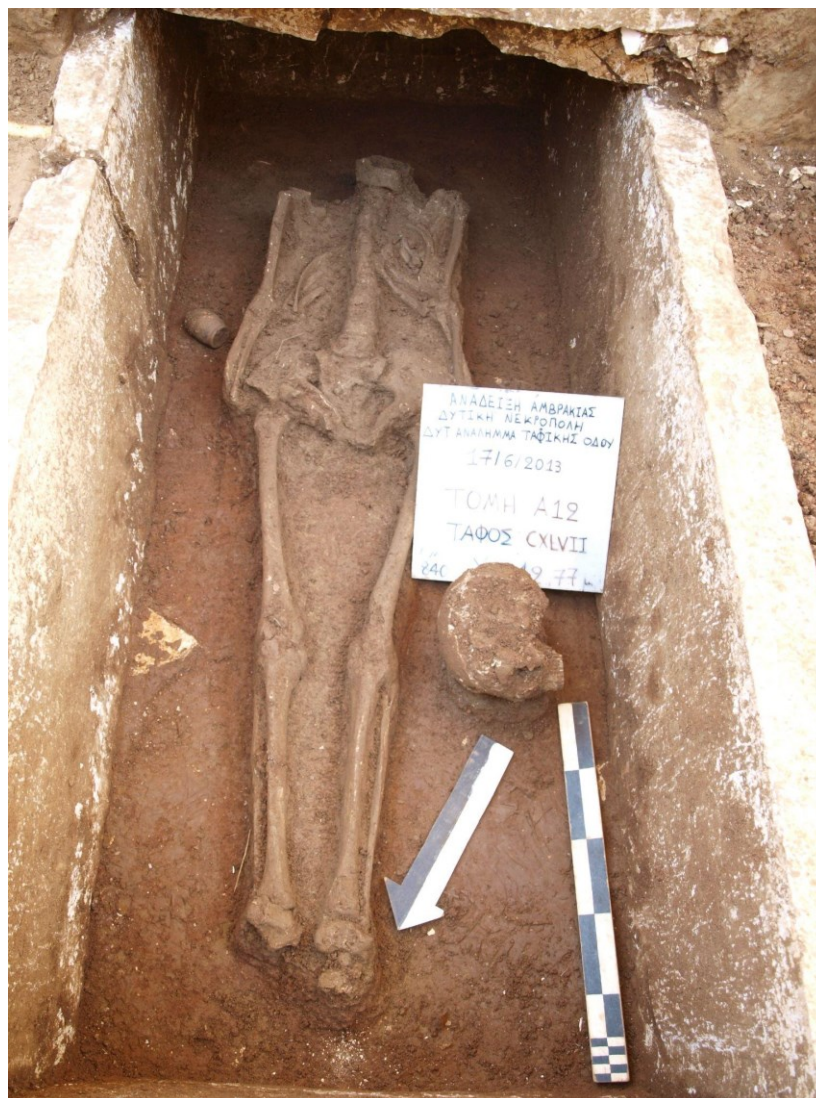

**Supplementary Figure S7.** Grave CXLVII, Western Necropolis of Amvrakia. Image(s) source: Archive of the Ephorate of Antiquities of Arta, Ministry of Culture, Greece.

**-Grave CCCLXXXVIII:** The pit-grave CCCLXXXVIII (**Supplementary Figure S8**) was located at the southwestern cemetery of Amvrakia (Kommenos plot) and it was excavated on 28/07/2015 in trench E21 at a depth of 15.28 m from the surface. The grave was located and partially constructed below the burial CCCLXXXVI. The grave contained two individual burials. Both primary (Anthro ID 14) and secondary (Anthro ID 13) burials had orientation N-S. The individuals were accompanied by a small lekythos (oil container) [40]. There is no direct dating, as the chronology is based mostly upon ceramics. The burials were dated to the Classical period, second quarter of the 5th century BCE (ca. 475-450 BCE).  
Deep-sequenced individual: Individual II (burial II), **Amv\_Epi\_CI\_4**.

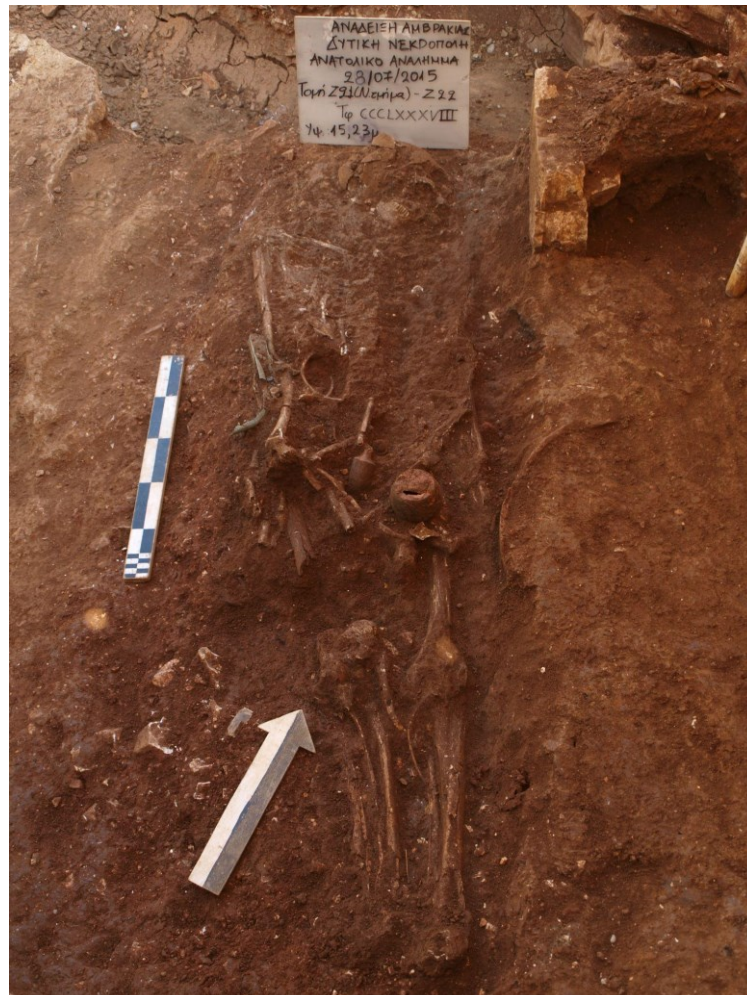

**Supplementary Figure S8.** Grave CCCLXXXVIII, Western Necropolis of Amvrakia. Image(s) source: Archive of the Ephorate of Antiquities of Arta, Ministry of Culture, Greece.



**-Grave CV:** The pit-grave CV (**Supplementary Figure S9**) was located in burial enclosure ε, at the southwestern cemetery of Amvrakia (Kommenos plot) and it was excavated on 30/03/2012 at a depth of 13.10 m from the surface. A limestone slab was found *in situ*. The grave contained distracted secondary burials of two subadults represented by two temporal bones (bonedata\_30032012\_cv1 and bonedata\_30032021\_cv2). The estimated age of the subadults was 4 and 4-18 years old (after macroscopic estimation), respectively. One ceramic vessel, a black-figured skyphos (drinking-cup), is associated with the burials. A clay rattle and a clay doll figurine were also found in situ [40]. The chronology is based upon ceramics. The burials were dated to the late Classical period, second quarter of the 4th century BCE (ca. 375-350 BCE).

Deep-sequenced individuals: Retrieval individual I (=secondary burial I), **Amv\_Epi\_CI\_5** and retrieval individual II (=secondary burial II), **Amv\_Epi\_CI\_6**.

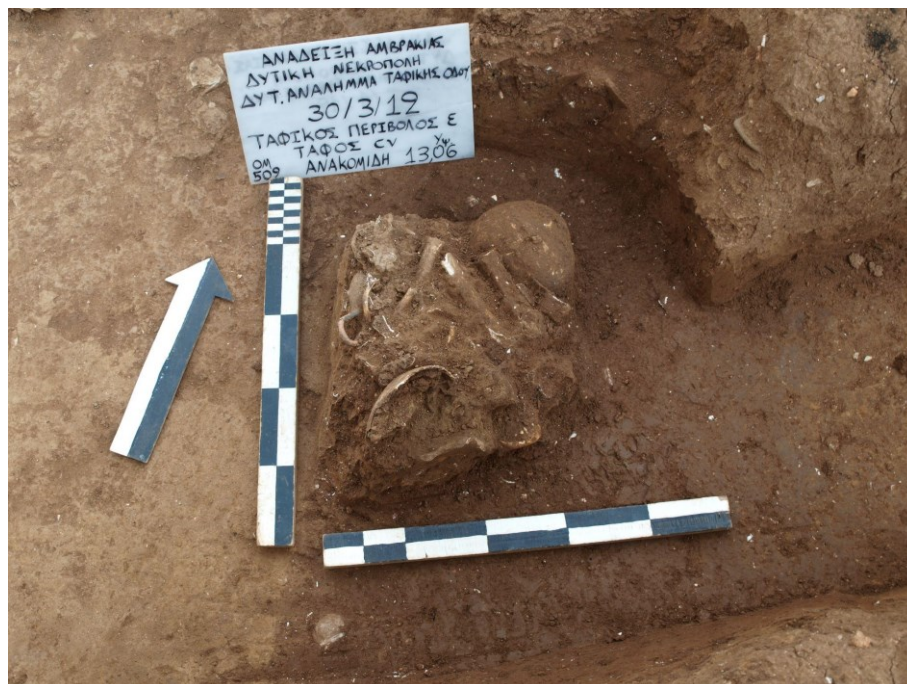

**Supplementary Figure S9.** Grave CV, Western Necropolis of Amvrakia. Image(s) source: Archive of the Ephorate of Antiquities of Arta, Ministry of Culture, Greece.

## Hellenistic period

**-Grave CCVIII:** The build limestone cist-grave CCVIII (**Supplementary Figure S10**), oriented E-W, was located at the southwestern cemetery of Amvrakia (Kommenou plot) and it was excavated on 19/07/2012 in trench E14. It was excavated at a depth of 15.90 m from the surface. A pile of stones was found *in situ*. The grave was reused. According to the excavation log book the grave contained two primary (orientation E-W; Anthro ID 211-212) and three secondary burials (Anthro ID 214-216). The earlier remains were pushed to the side of the cist when the grave was reopened. One ceramic vessel, a skyphos (drinking-cup), is associated with one of the burials. There is no direct dating, as the chronology is based mostly upon ceramics. The burials were dated to the Hellenistic period, 1st-3rd quarter of 2nd century BCE (ca. 200-125 BCE).

Deep-sequenced individual: primary burial individual Anthro ID 212, **Amv\_Epi\_Hel\_1**.

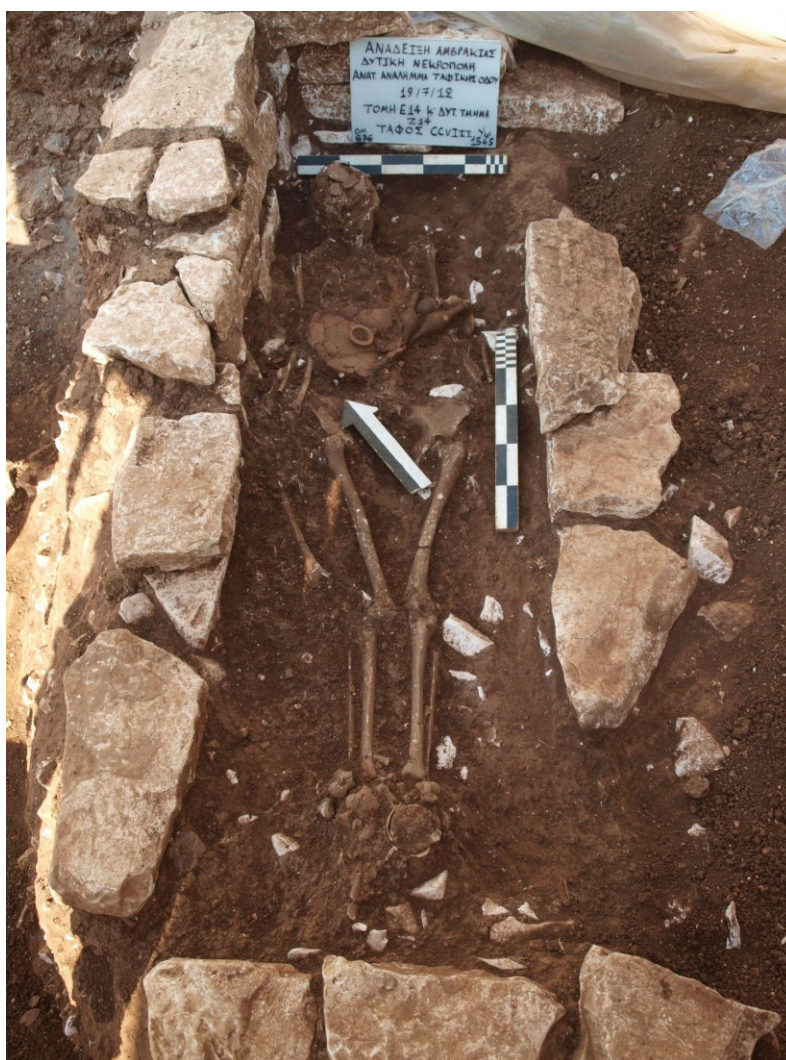

**Supplementary Figure S10.** Grave CCVIII, Western Necropolis of Amvrakia. Image(s) source: Archive of the Ephorate of Antiquities of Arta, Ministry of Culture, Greece.



**-Grave CXCIv:** The pit-grave CXCIv (**Supplementary Figure S11**), oriented E-W, was located at the southwestern cemetery of Amvrakia (Kommenou plot) and it was excavated on 26/06/2012 in trench Section E12 and Benchmark E11 - E12, and Section E13 (North of Wall 103), at a depth of 14.90 m from the surface. The grave contained one primary burial (orientation N-S; Anthro ID 656). An unidentified Hellenistic bronze coin found *in situ*, is associated with the burial. There is no direct dating, as the chronology is based mostly upon ceramics. The burial was dated to the Hellenistic period, 2nd half of 3rd century BCE (ca. 250-200 BCE).

Deep-sequenced individual: **Amv\_Epi\_Hel\_2**.

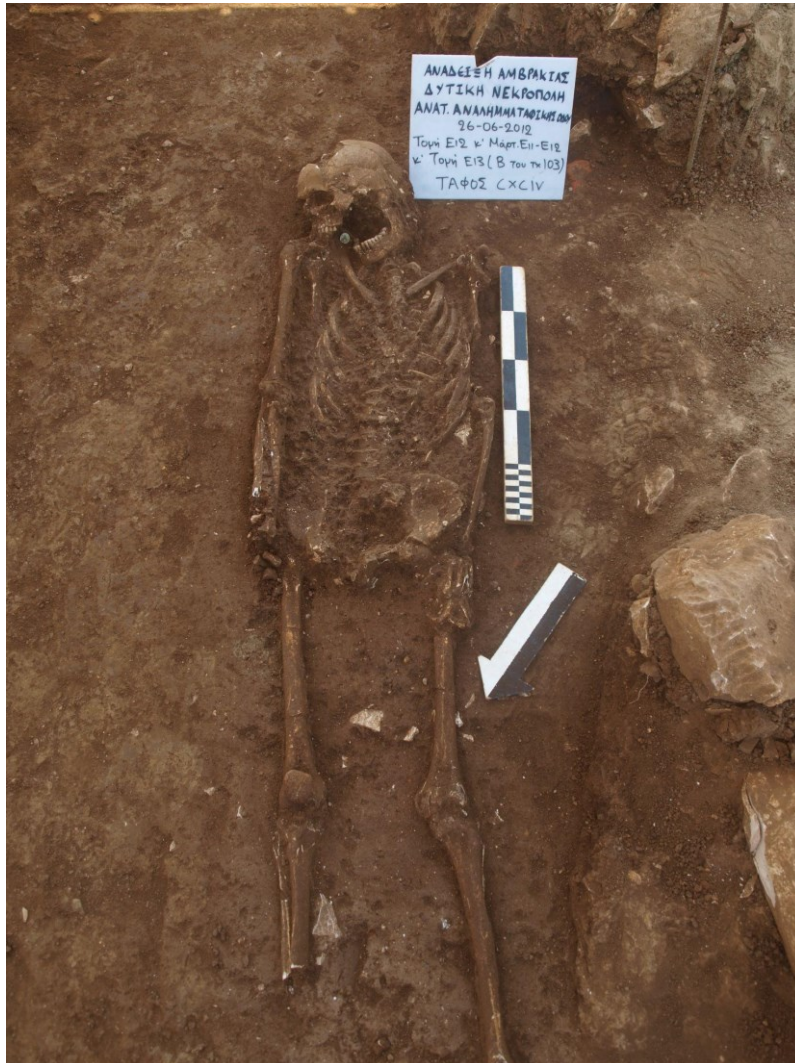

**Supplementary Figure S11.** Grave CXCIv, Western Necropolis of Amvrakia. Image(s) source: Archive of the Ephorate of Antiquities of Arta, Ministry of Culture, Greece.

**-Grave CCXLV:** The pit-grave CCXLV (**Supplementary Figure S12**), oriented S-N, was located at the southwestern cemetery of Amvrakia (Kommenou plot). It was excavated on 05/10/2012 at a depth of 14.52 m from the surface. The grave contained one primary burial (orientation S-N; Anthro ID 389) and one secondary burial (Anthro ID 390). A golden “danake” (coin), served as the so-called Charon's obol, was placed in the individual's mouth. It was found *in situ* among the individual's teeth. There is no direct dating, as the chronology is based mostly upon ceramics. The burials were dated to the Hellenistic period, 2nd-3rd quarter of 2nd century BCE (ca. 175-125 BCE).  
Deep-sequenced individuals: Retrieval individual (=secondary burial), **Amv\_Epi\_Hel\_3** and primary burial individual, **Amv\_Epi\_Hel\_4**.

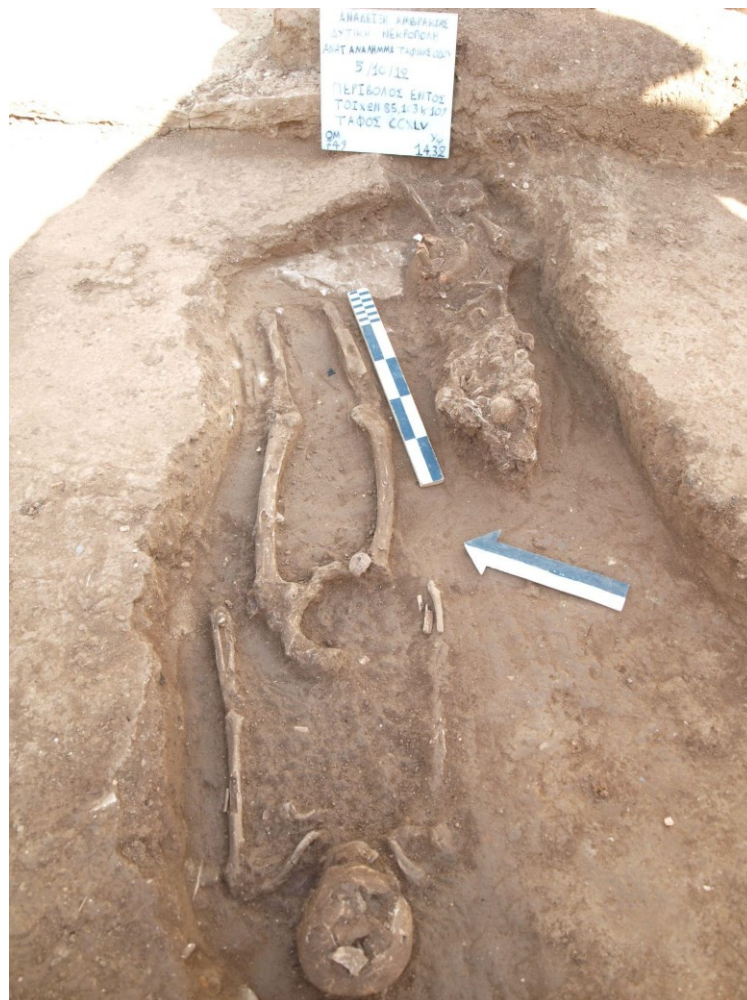

**Supplementary Figure S12.** Grave CCXLV, Western Necropolis of Amvrakia. Image(s) source: Archive of the Ephorate of Antiquities of Arta, Ministry of Culture, Greece.



**-Grave CCXXIII:** The limestone cist-grave CCXXIII (**Supplementary Figure S13**), oriented N-S, was located at the southwestern cemetery of Amvrakia (Kommenos plot) and it was excavated on 30/08/2012, in the precinct within the walls 105, 107, and 110, at a depth of 14.62 m from the surface. Broken limestone slabs were found *in situ*. The grave contained a total of five burials; three primary burials (Anthro ID 438 - 440), two secondary burials (Anthro ID 441-442), and one cremation burial (bonedata\_30082012\_CCXXIII) found in an amphora. The cremation amphora was found in the west side of the tomb. It held a lid made of lead (M89/OM697). The burials were accompanied by a terracotta spindle-shaped unguentarium (perfume bottle). There is no direct dating, as the chronology is based mostly upon ceramics. The burials were dated to the Hellenistic period. Due to absence of associated grave finds with the secondary burials, the dating is based on the usage period of the grave; late 4th to the 2nd century BCE (ca. 325-100 BCE).  
Deep-sequenced individual: Retrieval individual (=secondary burial) Anthro ID 441, **Amv\_Epi\_Hel\_5**.

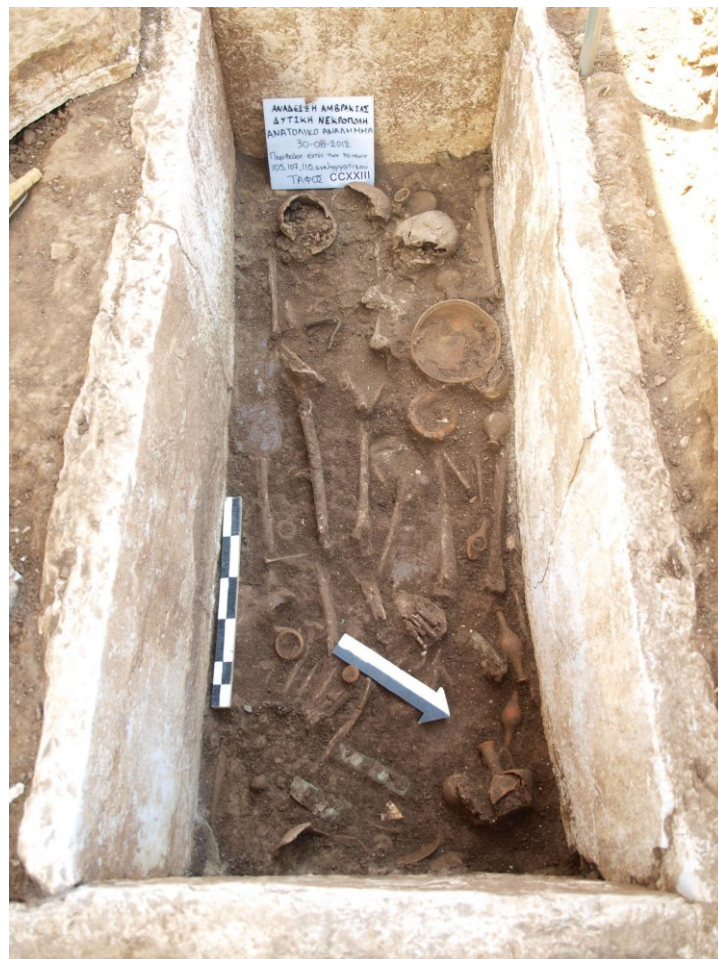

**Supplementary Figure S13.** Grave CCXXIII, Western Necropolis of Amvrakia. Image(s) source: Archive of the Ephorate of Antiquities of Arta, Ministry of Culture, Greece.

## Undated burial

**-Grave CCXLIII:** The limestone cist-grave CCXLIII (**Supplementary Figure S14**), oriented E-W, was located at the southwestern cemetery of Amvrakia (Kommenos plot) and it was excavated on 04/10/2012, in the perivolos within walls 85, 103, and 109, at a depth of 14.54 m from the surface. A limestone slab was found *in situ*. The grave contained two burials: one primary burial (orientation N-S; Anthro ID 661) and one secondary burial, as well as several isolated teeth (bonedata\_04102012\_CCXLIII). A fragmented iron stleggis (body scraper) was found *in situ*. Neither direct, nor indirect (e.g. ceramics-based) dating is available. Due to absence of -chronology-indicative- associated grave finds with these burials, their dating is based on the usage period of the necropolis; Archaic to Roman period (ca. 700 BCE - 476 CE).

Deep-sequenced individual: bonedata\_04102012\_CCXLIII, **Amv\_Epi\_Archaic\_to\_Roman**.

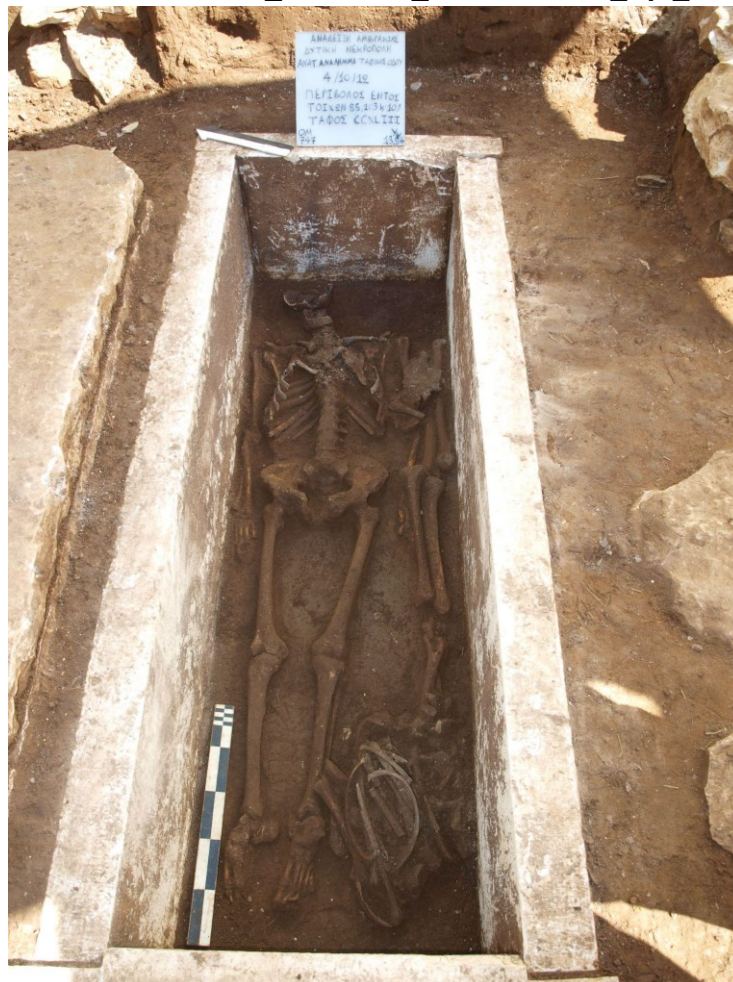

**Supplementary Figure S14.** Grave CCXLIII, Western Necropolis of Amvrakia. Image(s) source: Archive of the Ephorate of Antiquities of Arta, Ministry of Culture, Greece.

## 2.2. Ammotopos - “Kokkino Lithari” site

A prehistoric settlement of great importance was discovered (2015 - 2016) during construction work for the Ionian highway connecting western Greece to Athens. The site is situated at a crossroad of people and goods for the topography of the area, connecting Athamania, Molossida, and the Amvrakian plain. Remains of dry masonry constructions with finds of pottery, (big storage vessels), numerous stone tools etc. are dated to the Middle and Late Bronze Age (c. 2000-1000 BCE). The new archaeological site, named “Kokkino Lithari”, is located on the steep side of the hill directly opposite of House A of Orraos. The hill of “Kokkino Lithari” is a site where Neolithic structures and stone tools have been found. One of the most interesting finds was a grave located on the southern part of the hill, with walls made of limestone slabs. The tomb contained four burials (**Supplementary Figure S15**), an unglazed drinking vessel (kantharos type of local production), and a bronze ring. Another grave located closeby, at the Kastri hill, was uncovered. The Kastri tomb was dated to the Late Helladic (LH IIIA2- IIIB) period (ca. 1350-1200 BCE). This tomb contained five burials, a bronze knife, a necklace of stone beads, fragmented pottery (which were later restored and reconstructed to a Mycenaean jar and a Mycenaean global alabastron), and four Mycenaean kylikes from unstratified layers. The pottery clearly indicates the influence of the Mycenaean workshops in the area [26,44–46].

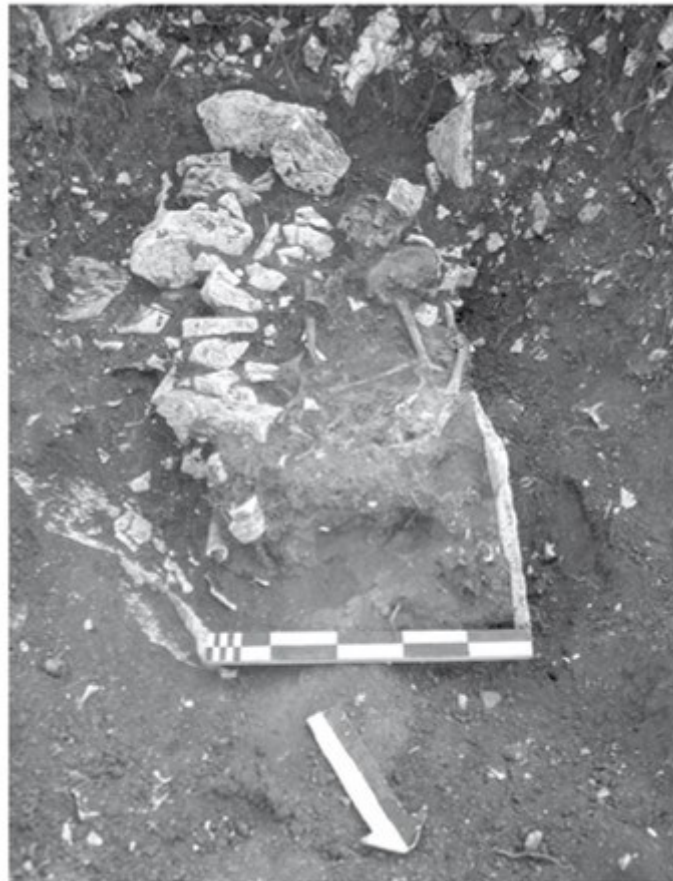

**Supplementary Figure S15.** Grave I, Kokkino Lithari site in Ammotopos. Image(s) source: Archive of the Ephorate of Antiquities of Arta, Ministry of Culture, Greece.

## Sampled Individuals

**-Grave I:** The grave was built with limestone slabs. It was located in the southern part of the "Kokkino Lithari" hill (IONIA Highway, X.Θ. 153+975). It was excavated on 26 & 27-05-2015, and contained four skeletons preserved from the femur and above. Two of them were oriented S-N (Anthro ID 17, Anthro ID 18), a third one in a N-S orientation, whereas the skeletal remains of a fourth burial were pushed toward the margins of the grave. No particular care was taken during the burial to ensure the position and orientation of the deceased. The grave goods were a bronze ring and a ceramic kantharos type vessel (drinking vessel) of probable local origin [46]. The finds date the burials to the Late Bronze Age (c.1350 - c.1125 BCE), and C<sup>14</sup> dating of individuals I and II narrows it down to 1276-1126 calBCE [3225-3075 calBP (95.4%)]. The dating was performed by the Oxford Radiocarbon Accelerator Unit (ORAU), University of Oxford, and the dates were calibrated using OxCal v.4.4.4 [47] and the IntCal20 atmospheric data from Reimer et al. [48].

Deep-sequenced individuals: Individual I (**Amm\_Epi\_LBA\_1**) and individual II (**Amm\_Epi\_LBA\_2**).



## 2.3. Cemeteries of Tenea

Since 2013 until today, ancient Tenea has been systematically excavated in the context of the “[Tenea Project](#)” that is supported by an interdisciplinary team. Important remains of the ancient city have been uncovered, which relate to its public and private life. The excavation of a large part of its cemeteries yielded important information concerning the living conditions of its inhabitants, as well as the broader image of the city in terms of its organization and layout, customs and practices.

Initially, in 1984, the archaeological service brought to light the archaic porous sarcophagus of Chiliomodi, which is now exhibited in the Archaeological Museum of Ancient Corinth [49]. Inside the sarcophagus, a female burial aged 18–28 years was preserved in an outstretched position, oriented SW/NE. The burial was enriched with, among other things, a metal and wooden pin, a bronze mirror, a pyxis - kalathos, and a handleless decorated pyxis with curved walls, which are representative examples of Corinthian art during the early 6th century BCE [50]. The uniqueness of the find, however, lies in the covering slab of the sarcophagus, which had a painted representation on its inner side in ad secco technique. Two lions heraldically placed on an off-white background are depicted with an antefix in between in the form of a palmate. The image is framed by a red band and is definitely related to the monumental painting of the Archaic period [49,50].

Around the sarcophagus of 1984, a cluster of Archaic graves was discovered in the years 2013-2015 (**Supplementary Figure S16**), which yielded a substantial number of grave goods, many of which introduce new typological shapes in the relevant bibliography [51]. More specifically, four burials in porous monolithic sarcophagi, which date from the beginning of the 6th to the beginning of the 5th century BC, have come to light. These are burials of a child (Grave 02), a woman about 50 years old (Grave 03), and two men (Grave 04 and 05), aged about 40-50 years and over 50 years old. The burials were enriched with ceramic and metal objects that were located, either inside, or around the graves. The graves were not uniformly oriented. The child's burial (Grave 02) stands out, around and within which 58 ceramic, metal and lead objects that accompanied the burial were found. Typologically, the findings consist of oenoches, aryballoi, pyxides, as well as a lekanis, a hydriks, a lekythos and two bronze lekanides that date to the Corinthian art of the early 6th century BCE. Remarkable finds are a double askos with a rope handle and trefoil strained spout, as well as two small-sized handleless vases, for which no parallel finds have been identified so far [36]. The other graves had undisturbed burials in an extended position-oriented SW/NE. Graves 03 and 04 contained only one burial each, and date to the mid and late 6th century BCE. Grave 05 dates to the beginning of the 5th century BCE and contained six vases, two kylikes, two lekythoi, a skyphos, and an oenochos. In the proximity of the grave a modern deposit was found, in which two lekanides with lids, two kylikes, two skyphoi, and an oenochos were found [36].

At a short distance from the archaic cluster, a Hellenistic period pit grave was found, which housed the remains of two adults. The burials were adorned with a krateriskos, a miniature oenochos, a miniature cup, and a lamp, which can be dated through the four coins minted in the reign of Ptolemy III that were also placed as grave goods.

Hellenistic burials were also found at the southwestern border of the cemetery zone, at the “Palaio Scholeio” area (**Supplementary Figure S19**). The burials were organized in the area north and east of a semi-underground cistern, violating in some cases earlier structures for their encapsulation. The excavation revealed a total of ten graves of the Hellenistic period, the majority of which were reused in Roman times. The number and type of grave goods found inside the undisturbed graves is impressive, with vases representative of the Hellenistic

period, such as miniature vases and unguentaria, but also more refined shapes, such as the lagynos and the funerary calpe found in Grave 17. Also noteworthy are the metal objects that came to light, such as bronze mirrors, iron strigils, and a bronze oinochoe. A gold-plated bronze wreath of myrtle leaves and fruits, a gold ring, and other metal jewellery are included, as well as gold danakes.

The graves belong to the types of pit graves, monolithic sarcophagoi, but also stone coffins with porous covering slabs. The reuse of the graves during the Roman period resulted in the identification of sidelined anthropological remains on the outside of the graves and the coexistence of Hellenistic and Roman finds. The macroscopic study of the anthropological remains found inside and outside the graves played a key role in the separation of the main and secondary burials.

The Roman burials identified as having reused Hellenistic graves and others in upper excavation layers in the same area, belong to a well-organized Roman cemetery around the perimeter of an above-ground funerary monument discovered in 2016 (**Supplementary Figure S22**). The monument is a two-room above-ground and temple-shaped funerary monument of the 1st - 2nd century CE. with dimensions 10.53 × 5.82 m, orientation E/W, and entrance to the West. In the burial chamber, five built cist graves are formed with dimensions of 2.00 × 0.68 m each in a circumferential layout that has the shape of the Greek letter "Π". Monuments of similar typology, roofed with vaults, can be found in Patras, Argos, Nicopolis, Ostia, and Asia Minor [35][36]. The funerary monument of Tenea is one of the few above-ground burial monuments found so far in the Corinthia regional unit of present-day Greece, yet without there being another of similar typology.

Around the monument, an organized cemetery of Roman times was revealed, dating from the 3rd century CE, up to the 5th century CE. The graves are distinguished according to their typology into pit graves, kalyvites pit graves, and jar burials. The burials were found richly adorned with lamps, glass, gold, silver, lead, bronze and iron jewellery, vases of everyday use, glass vessels, metal tools, bone jewellery and tools, organic remains, coins, and shoe nails [36,51].

As all the above evidence suggests, the "Palaio Scholeio" area and specifically the location of the funerary monument, was a place with long burial use and ritual value in antiquity, near the ancient city and the residential web.



### 2.3.1 Graves associated with the deep-sequenced individuals of the present study

#### Archaic period (Faneromeni-Kamareta site)

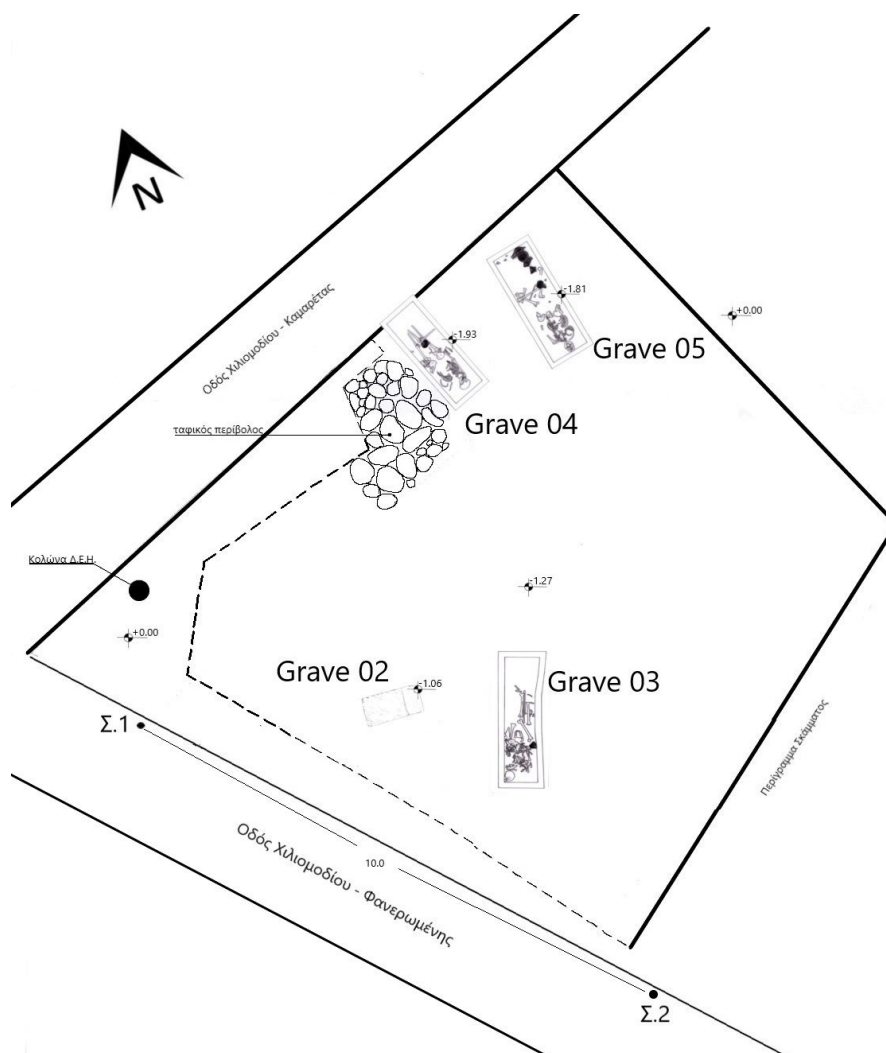

**Supplementary Figure S16.** The location of graves 3 and 5 in the Phaneromeni-Kamareta site of Ancient Tenea. Image(s) source: Archive of the Ephorate of Antiquities of Corinth, Ministry of Culture, Greece.

**-Grave 03:** The porous sarcophagus (**Supplementary Figure S17**), oriented N-S, was excavated on 08/09/2014, in trench E1-I, in the cemetery of Tenea (Faneromeni-Kamareta, Tsirtsis plot). The sarcophagus carried a porous lid. The dimensions of the sarcophagus are  $2.20 \times 0.09 \times 0.45$  m. A layer of mortar covers much of the sarcophagus. The mortar thickness is 1-3.5 cm. The interior of the sarcophagus contained one burial of an adult. It contained one skyphos (drinking-cup) and an iron nail, all found *in situ*. The chronology is based mostly on the ceramics and dates to the late Archaic period (ca. 550-500 BCE). Deep-sequenced individual: **Ten\_Pel\_Arch\_2**.

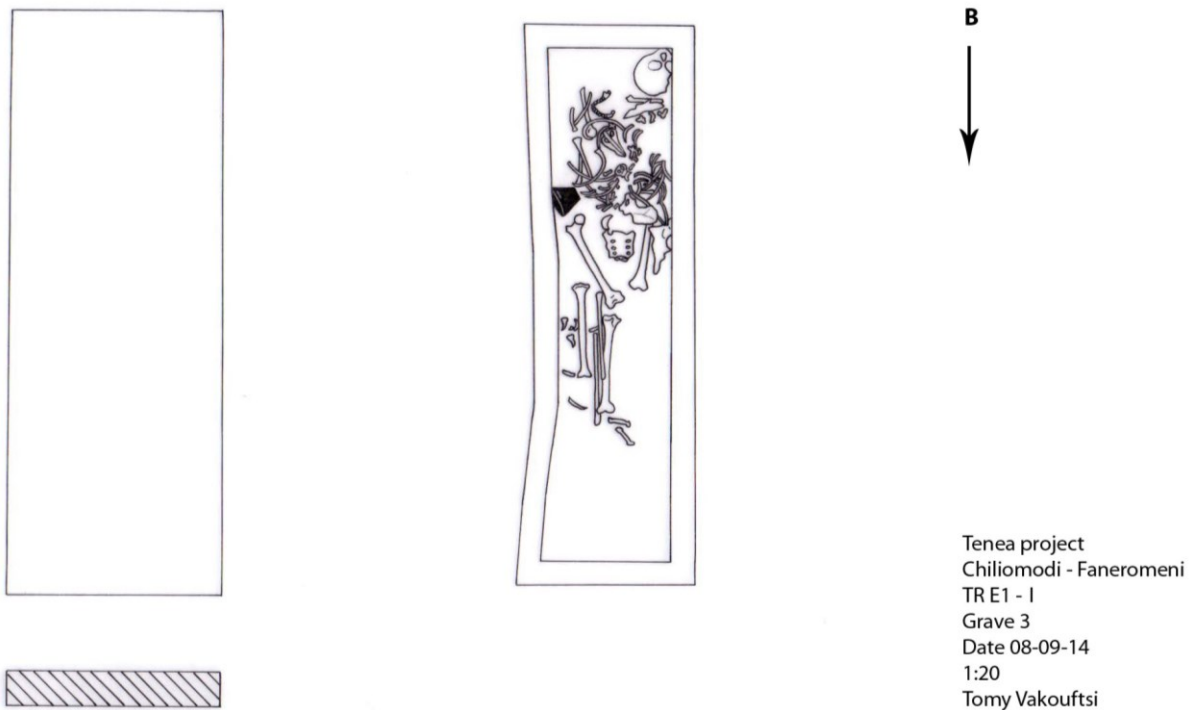

**Supplementary Figure S17.** The sarcophagus of grave 5 in the Faneromeni-Kamareta site of Ancient Tenea. Image(s) source: Archive of the Ephorate of Antiquities of Corinth, Ministry of Culture, Greece.

698 -**Grave 5:** The porous sarcophagus (**Supplementary Figure S18**), oriented NE-SW, was  
 699 excavated on 08/10/2014, in trench E1-I, in the cemetery of Tenea (Faneromeni-Kamareta,  
 700 Tsirtsis plot). The sarcophagus carried a porous lid. The dimension of the sarcophagus are  
 701  $0.80 \times 0.82 \times 2.10$  m. A modern layer covers much of the sarcophagus. Its thickness is 1 cm.  
 702 The interior of the sarcophagus contained one burial of an adult. It contained six vases (among  
 703 them two kylikes, two lekythoi, one skyphos, and one oinochoe) and one iron ring. The  
 704 chronology is based on the ceramics and dates to the late Archaic period (ca. 500-480 BCE).  
 705 Deep-sequenced individual codes: **Ten\_Pel\_Arch\_1**.

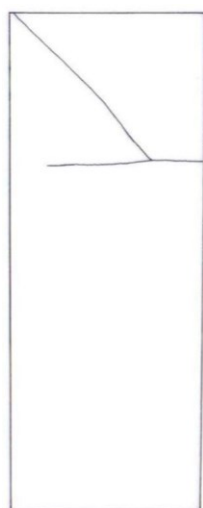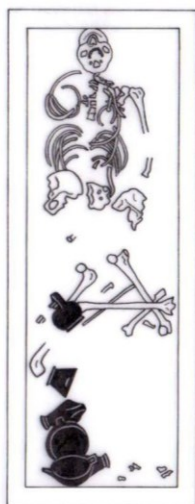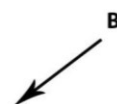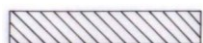

Tenea project  
 Chiliomodi - Faneromeni  
 TR E1 - I  
 Grave 5  
 Date 08-10-14  
 1:20  
 Tomy Vakouftsi

706 **Supplementary Figure S18.** The sarcophagus of grave 5 in the Faneromeni-Kamareta site  
 707 of Ancient Tenea. Image(s) source: Archive of the Ephorate of Antiquities of Corinth, Ministry  
 708 of Culture, Greece.  
 709  
 710

## Hellenistic and Roman periods (Cemetery of Tenea)

### Hellenistic period

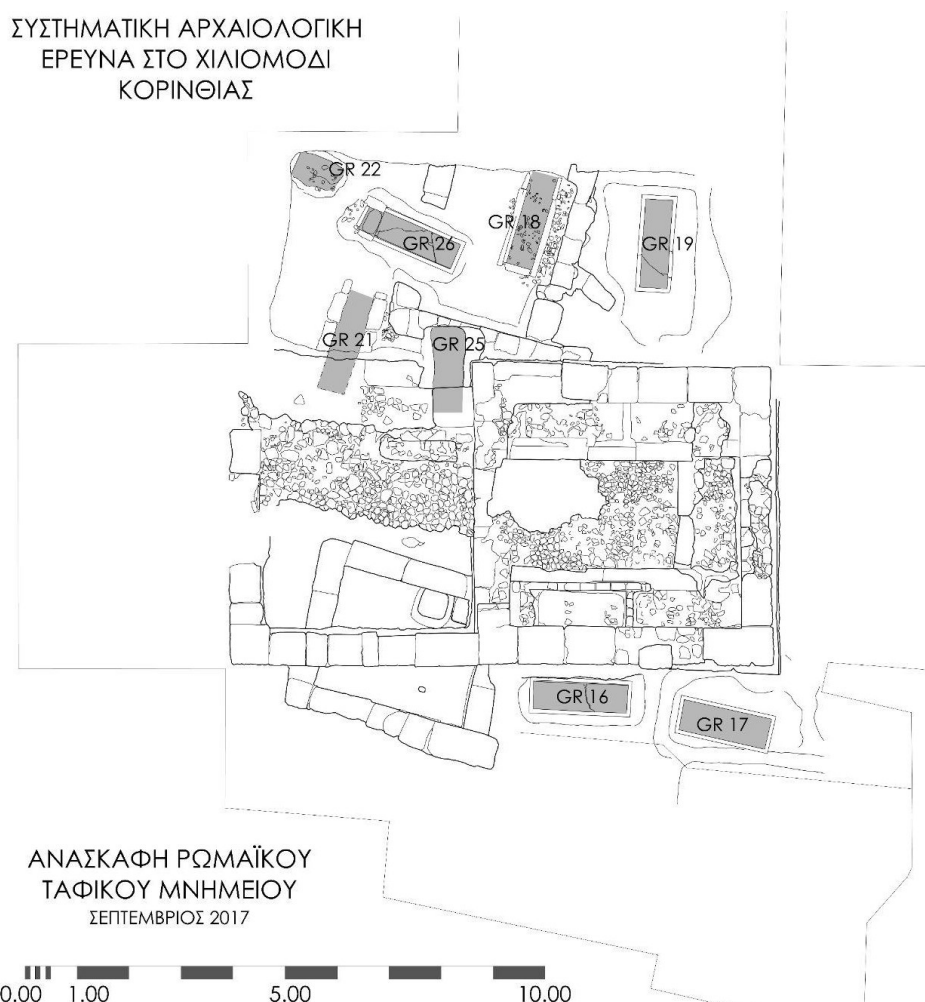

**Supplementary Figure S19.** The Hellenistic graves in the cemetery of Tenea (Palaio Scholeio, Hasikidis plot). Image(s) source: Archive of the Ephorate of Antiquities of Corinth, Ministry of Culture, Greece.

**-Grave 18:** The porous sarcophagus, oriented N-S, was excavated on 24/09/2017 in trench 2017/3, in the cemetery of Tenea (Palaio Scholeio, Hasikidis plot). The grave was located north of a cistern used for ritual purposes, upon which the Roman grave monument (Grave Monument I) was built. Grave 18 contained the burial of one adult. The individual was accompanied by seven fusiform unguentaria, a terracotta lamp, a skyphos, two miniature vases, two pytharia, a gold *Danake*, a ring with semi-precious stone, a folded mirror, a bronze wreath with gilded leaves and myrtle fruits, red-colored pigments, metal fragments, a bone hinge, etc. The chronology is based on the ceramics and dates to the Hellenistic period (ca. 150-100 BCE).

Deep-sequenced individual: **Ten\_Pel\_Hel\_1**.

**-Grave 26 (re-used Hellenistic grave):** The porous sarcophagus (**Supplementary Figure S20**), oriented E-W, was excavated on 09/10/2017 in trench 2017/2 in the cemetery of Tenea (Palaio Scholeio, Hasikidis plot). The sarcophagus carried a porous lid. The dimensions of the grave are 1.91 × 0.53 m. The interior of the sarcophagus contained three burials of three adults. The coffin itself, as well as one of the burials (Individual 2), dates to the Hellenistic times (323–31 BCE), while the remaining burials were located inside the sarcophagus during the Roman period. The sarcophagus contained various offerings, including a glass unguentarium, six ceramic unguentaria, two ceramic oinochoe, a bronze oinochoe, a skyphos, a glass vessel, a ceramic pedestal, a silver coin, etc. The chronology is based mostly on the ceramics.

Deep-sequenced individual codes: Individual 2, **Ten\_Pel\_Hel\_2**.

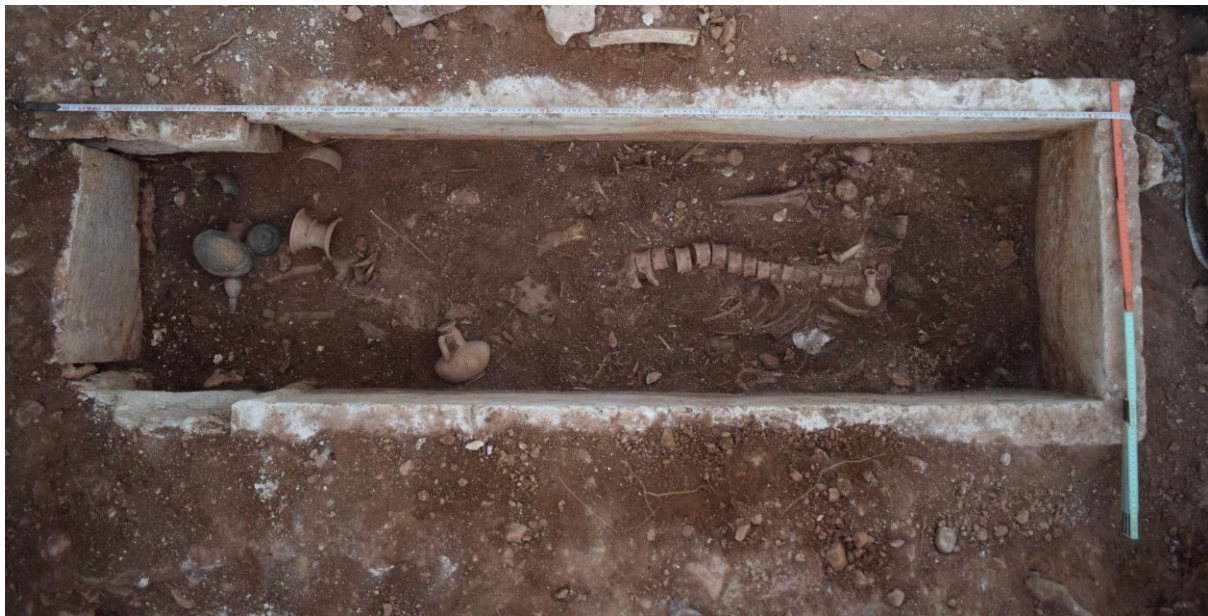

**Supplementary Figure S20.** Grave 26, cemetery of Tenea (Palaio Scholeio, Hasikidis plot). Image(s) source: Archive of the Ephorate of Antiquities of Corinth, Ministry of Culture, Greece.

**-Grave 33 (re-used Hellenistic grave):** The pit-grave 33 (**Supplementary Figure S21**), oriented W-E, was excavated on 20/09/2018, in trench 2018/3, in the cemetery of Tenea (Palaio Scholeio, Hasikidis plot). The grave was covered with a porous lid, upon which a roman vase was found. The dimensions of the grave are 1.31 × 0.42 m. The grave contained the burial of one adult. The individual was accompanied by a fragmented Hellenistic unguentarium (perfume bottle). From the evidence of the burial assemblage, it is not possible to determine whether the skeletal remains belong to a burial contemporary with the Hellenistic vase found inside the pit or contemporary with the Roman vase found on top of the covering lid. In either case it appears that the grave was disturbed during the Roman period either for reuse or because of the construction (foundation) of the Roman wall found parallel to the grave. Putative date: late Hellenistic - early Roman period, 1st century BCE - 1st century CE (ca. 100 BCE - 100 CE).

Deep-sequenced individual: **Ten\_Pel\_LHellenisticERoman**.

TENEA PROJECT  
PLOT CHASIKIDIS  
TRENCH 2018/X GROUP X

GRAVE 33

X: PHASE X  
0X.09.2018

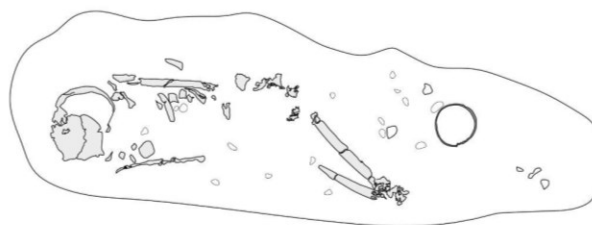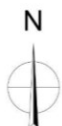

0 0.1 0.5 1.00 m  
Scale: 1:10 A. Anastasiou, L. Syrokov, E. Lazoga September 2018

**Supplementary Figure S21.** Grave 33, cemetery of Tenea (Palaio Scholeio, Hasikidis plot).

Image(s) source: Archive of the Ephorate of Antiquities of Corinth, Ministry of Culture, Greece.

765 Roman period  
766

ΣΥΣΤΗΜΑΤΙΚΗ ΑΡΧΑΙΟΛΟΓΙΚΗ  
ΕΡΕΥΝΑ ΣΤΟ ΧΙΛΙΟΜΟΔΙ  
ΚΟΡΙΝΘΙΑΣ

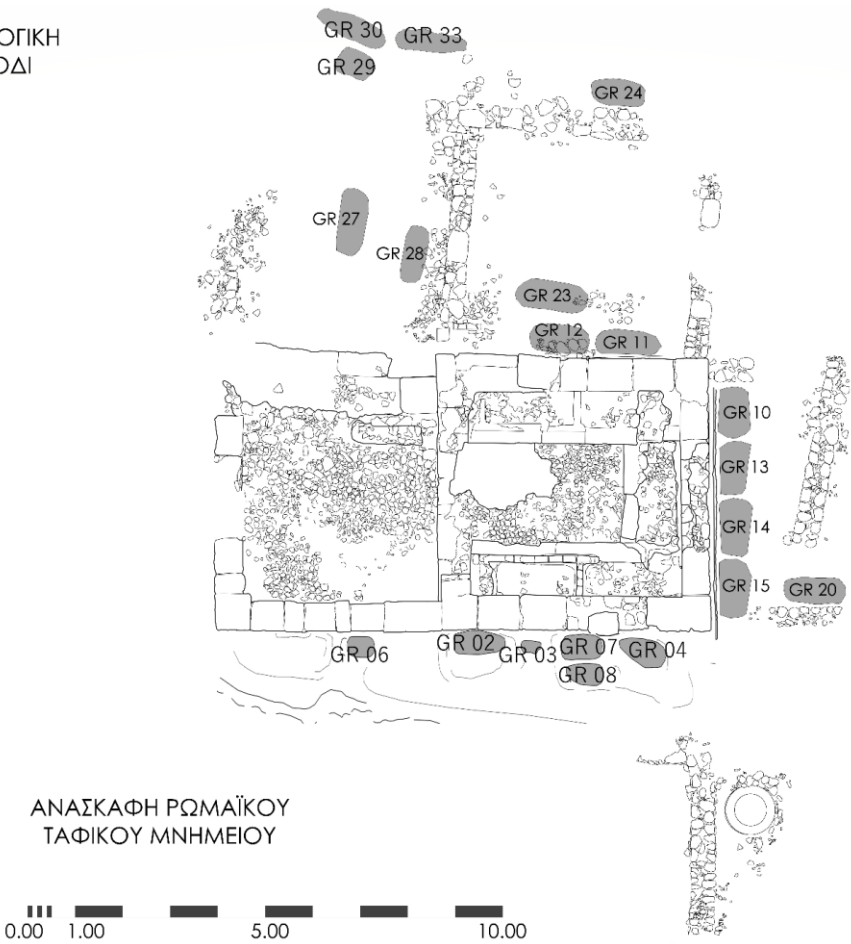

767  
768 **Supplementary Figure S22.** The Roman graves in the cemetery of Tenea (Palaio Scholeio,  
769 Hasikidis plot). Image(s) source: Archive of the Ephorate of Antiquities of Corinth, Ministry of  
770 Culture, Greece.

771  
772



**-Grave 07:** The pit - kalyvites grave (**Supplementary Figure S23**), oriented E-W, was excavated on 06/10/2016, in the cemetery of Tenea (Palaio Scholeio, Hasikidis plot). The grave was found intact, with dimensions 1.50 × 0.60 m. The grave contained the burials of three children. The main child, aged about 5 years old (Individual 1) was placed in an extended position, while the skulls and some long bones of two other children were found toward the west of the main burial. The individuals were accompanied by a glass unguentarium (perfume bottle), a needle and several nails. The chronology is based mostly on the grave offerings and dates to the Roman Period (3rd century CE).

Deep-sequenced individual: Individual 1, **Ten\_Pel\_Rom\_3**.

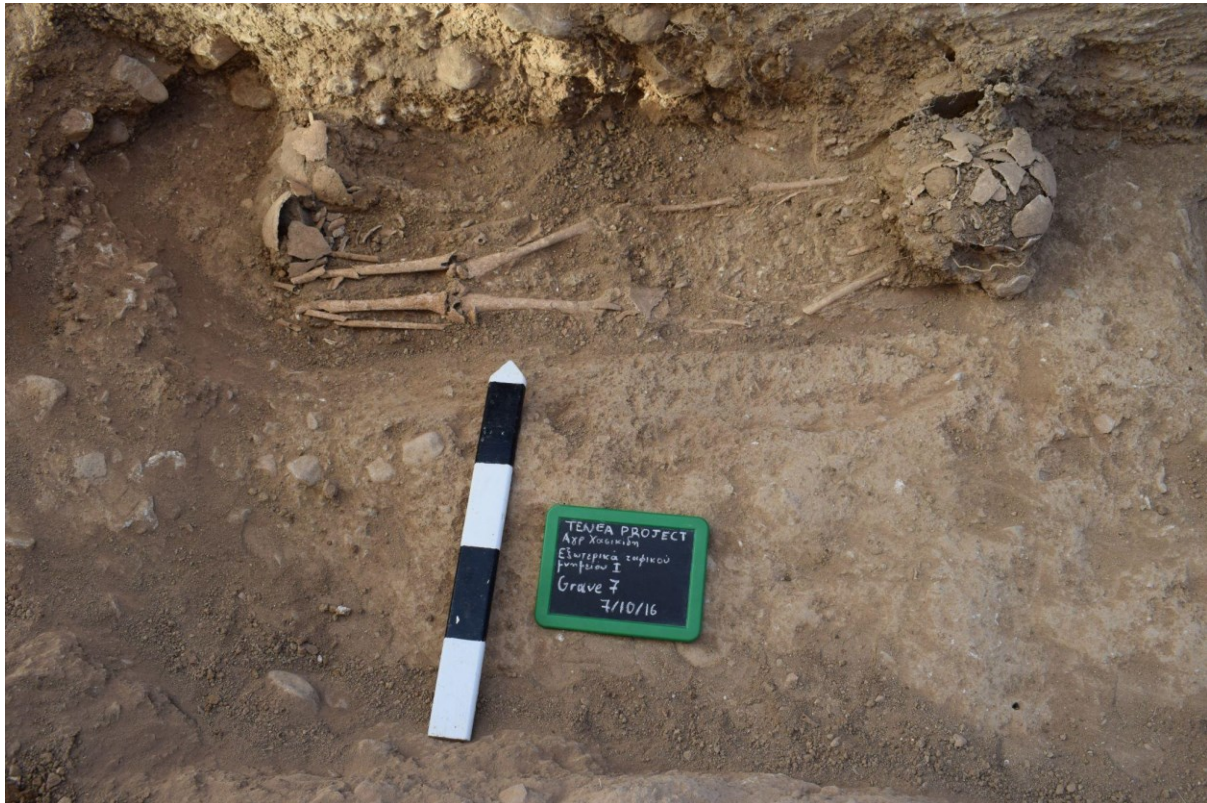

**Supplementary Figure S23.** Grave 07, cemetery of Tenea (Palaio Scholeio, Hasikidis plot). Image(s) source: Archive of the Ephorate of Antiquities of Corinth, Ministry of Culture, Greece.



**-Grave 15:** The pit - kalyvites grave (**Supplementary Figure S24**), oriented N-S, was excavated on 15/09/2017 in trench 2017/4, in the cemetery of Tenea (Palaio Scholeio, Hasikidis plot). The grave was found intact, with dimensions 1.17 × 0.52 m. The grave contained the burial of one child, aged about 7 years. The individual was accompanied by a lamp bearing an image of Aphrodite, a ceramic plate and a coin. The chronology is based mostly on the grave offerings and dates to the Roman period, (2nd century CE).

Deep-sequenced individual: **Ten\_Pel\_Rom\_2**.

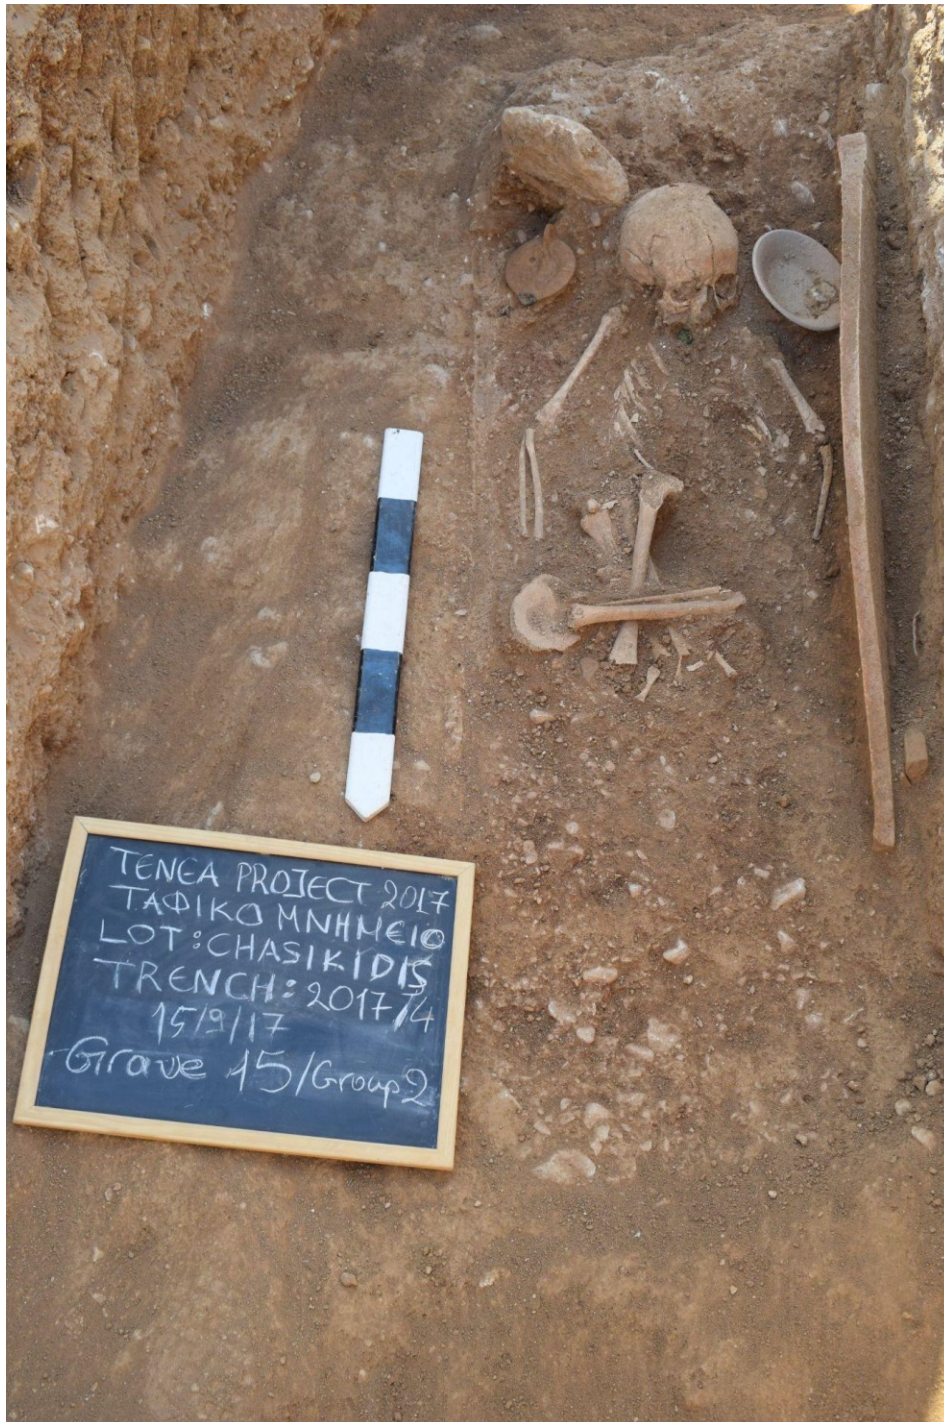

**Supplementary Figure S24.** Grave 15, cemetery of Tenea (Palaio Scholeio, Hasikidis plot). Image(s) source: Archive of the Ephorate of Antiquities of Corinth, Ministry of Culture, Greece.

**-Grave 22:** The pit-grave (**Supplementary Figure S25**), oriented NW-SE, was excavated on 06/10/2017 in trench 2017/2, in the cemetery of Tenea (Palaio Scholeio, Hasikidis plot). The pit grave carried a porous lid. The dimensions of the grave are 1.00 × 0.60 m. The grave contained the burial of a woman aged around 18 years old and a fetus around 20–22 weeks old, found in the pelvic area. The individuals were accompanied by a gold foil, while remains, probably of a wooden carrier, were collected along with iron nails. From the evidence of the burial assemblage, it is not possible to determine the chronology of the grave, although it most likely belongs to the roman period (31 BCE - 330 CE).

Deep-sequenced individual: Individual 1 (adult), **Ten\_Pel\_Rom\_4**.

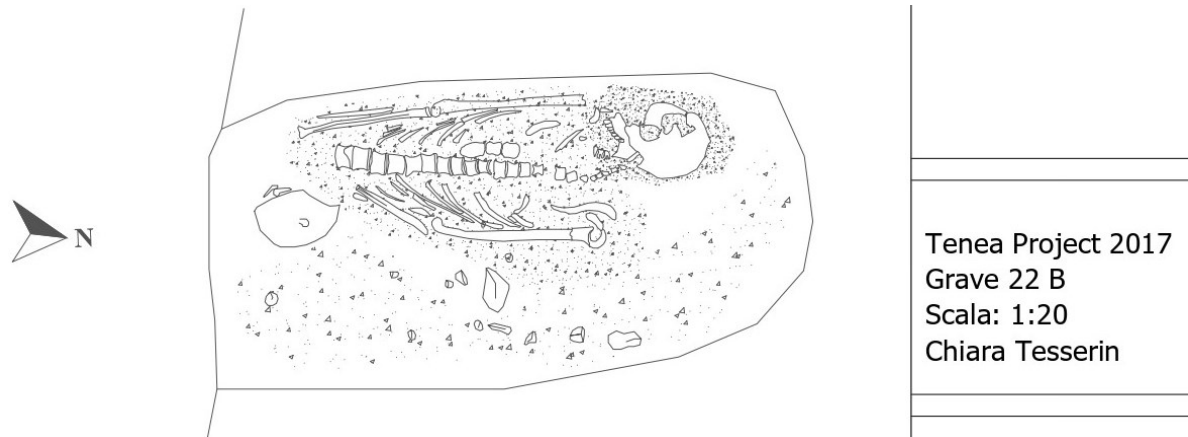

**Supplementary Figure S25.** Grave 22, cemetery of Tenea (Palaio Scholeio, Hasikidis plot). Image(s) source: Archive of the Ephorate of Antiquities of Corinth, Ministry of Culture, Greece.

**-Grave 30:** The pit - kalyvites grave (**Supplementary Figure S26**), oriented SE-NW, was excavated on 07/09/2018 in the cemetery of Tenea (Palaio Scholeio, Hasikidis plot). The grave contained three burials of two adults (Individual 1 and Individual 3) and one child (Individual 2). The individuals were accompanied by a gold earring, handleless vase, lekanis, bone pins, and a Hellenistic coin placed as *Charon's obol*. The chronology is based on the grave offerings and dates to the Roman period (3rd - 4th century CE). Deep-sequenced individual codes: Individual 2 (child), **Ten\_Pel\_Rom\_1**.

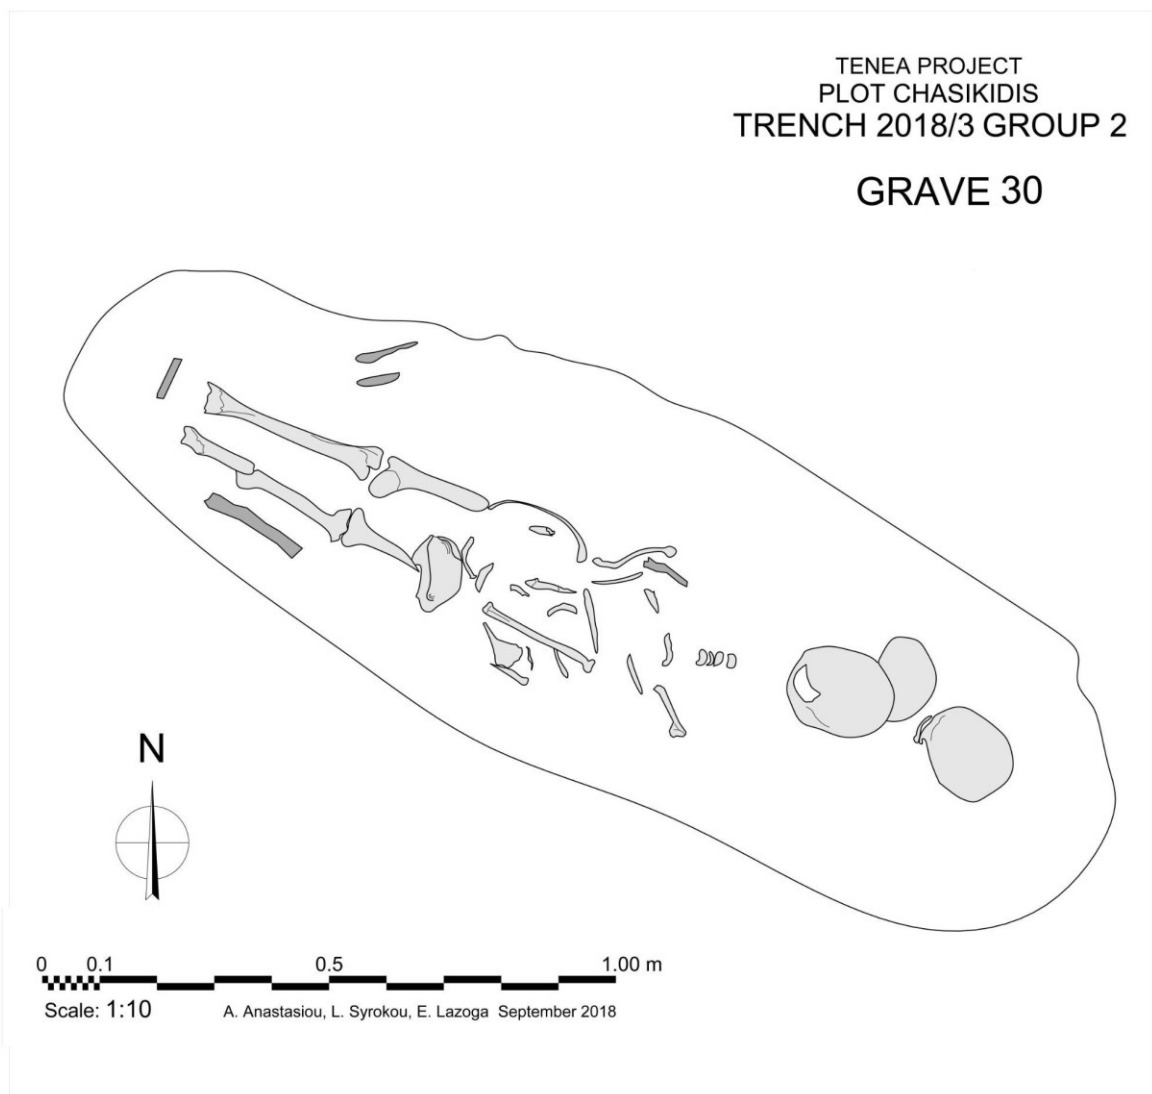

**Supplementary Figure S26.** Grave 30, cemetery of Tenea (Palaio Scholeio, Hasikidis plot). Image(s) source: Archive of the Ephorate of Antiquities of Corinth, Ministry of Culture, Greece.

## 3. Ancient DNA Analysis

### 3.1 Sample Preparation

*Despoina Vassou, Sevasti Koursioti, and Nikolaos Psonis*

All analyses, that is, sample processing, DNA extraction, and genomic library preparation were performed in the cleanroom facilities of the Ancient DNA Lab at IMBB-FORTH. Negative controls (DNA-free) were included in all steps of the experimental procedure (DNA extraction, library preparation, and PCR amplification) to control for exogenous DNA contamination. Details on the analyses conducted for each sample are provided in **Additional file 1**.

#### *Dental samples processing*

For all dental samples, we used the minimally destructive dental root cementum decalcification method of Harney et al. [52]. Briefly, the outer surface of the tooth was decontaminated by a series of gentle washes using a cotton swab, starting with water, then 0.5% sodium hypochlorite solution (bleach), water again to remove all bleach traces, and finally absolute ethanol to remove all water traces. The samples were left to dry completely and were subsequently UV irradiated (6 J/cm<sup>2</sup> at 254 nm) in a UVP CL-1000 UV Crosslinker for 10 mins on each side. Each dental root was submerged in a 1 ml extraction buffer (0.45M EDTA, 0.05% Tween 20, Proteinase K 0.25 mg/ml) at 42 °C under mild agitation. The buffer was exchanged after 24 hours in some cases, if cementum was still visible. DNA extraction and purification was performed using the magnetic beads-based protocol of Rohland et al. [53] with buffer D.

#### *Pars petrosal samples processing*

For the majority of the temporal bone samples, the outer surface of the petrous area was cleaned using a diamond disk at low speed with a multitool drill (ProLab Basic Laboratory Control, Bien Air, Switzerland). *Pars petrosal* was isolated and powdered using pliers. For one sample (Amv\_Epi\_Arch\_3), we used the minimally destructive petrous bone powder sampling method of Orfanou et al. [54] that involves targeted drilling toward the petrous area without cutting the bone. Before drilling, the outer surface of the petrous bone was decontaminated in the same way as described above for the teeth. For all *pars petrosal* samples, approximately 50-150 mg of powder were used for demineralization, DNA extraction and purification using either the magnetic beads-based or the large-volume column-based protocol of Rohland et al. [53] with buffer D.

#### *Genomic libraries and sequencing*

Double stranded, blunt-end libraries were constructed following published protocols [55,56], albeit by substituting buffer BL01 with buffer D [57] to enrich for smaller fragments of DNA. No library pre-treatment was used during pre-screening. The number of amplification/indexing PCR cycles for each library was determined with qPCR. Single or double indexing was performed for pre-screening purposes. Purification of amplified libraries was performed twice with AMPure XP Beads (BeckMan Coulter, Inc., USA) at a 1:1.8 ratio (DNA:beads). Quality control and quantification of the libraries was performed with Qubit

(Thermo Fisher Scientific, Inc., USA) and Bioanalyzer (Agilent Technologies, Inc., USA). Endogenous DNA content and post-mortem deamination (PMD) damage was initially estimated via shallow sequencing on an Illumina NextSeq500 platform using either, single-end (1×75), or paired-end (2×75) chemistry (Genomics Facility, IMBB-FORTH, Greece).

For deeper sequencing on selected samples and libraries (useful mapped content >1.0%), we prepared fresh libraries (from previous or new DNA extractions) following the same procedure as above, albeit with two modifications: a) pre-treatment of the libraries with the USER<sup>TM</sup> enzyme (New England BioLabs Inc., USA) for 30 min [partial UDG-treatment method of Rohland *et al.* [58]] in order to reduce deamination misincorporation in the DNA sequence data and b) double indexing with unique 8bp barcodes in order to reduce potential cross-sample contamination issues during indexing. USER treatment was not performed for two samples (Amv\_Epi\_Arch\_2 and Amv\_Epi\_Arch\_3). Deeper sequencing was performed in an Illumina Novaseq6000 platform (Macrogen, Inc., South Korea), using paired-end (2×100 and 2×150) chemistry.

## 3.2 Read Processing, Damage estimation, Genetic sex determination

**Nikolaos Psonis**

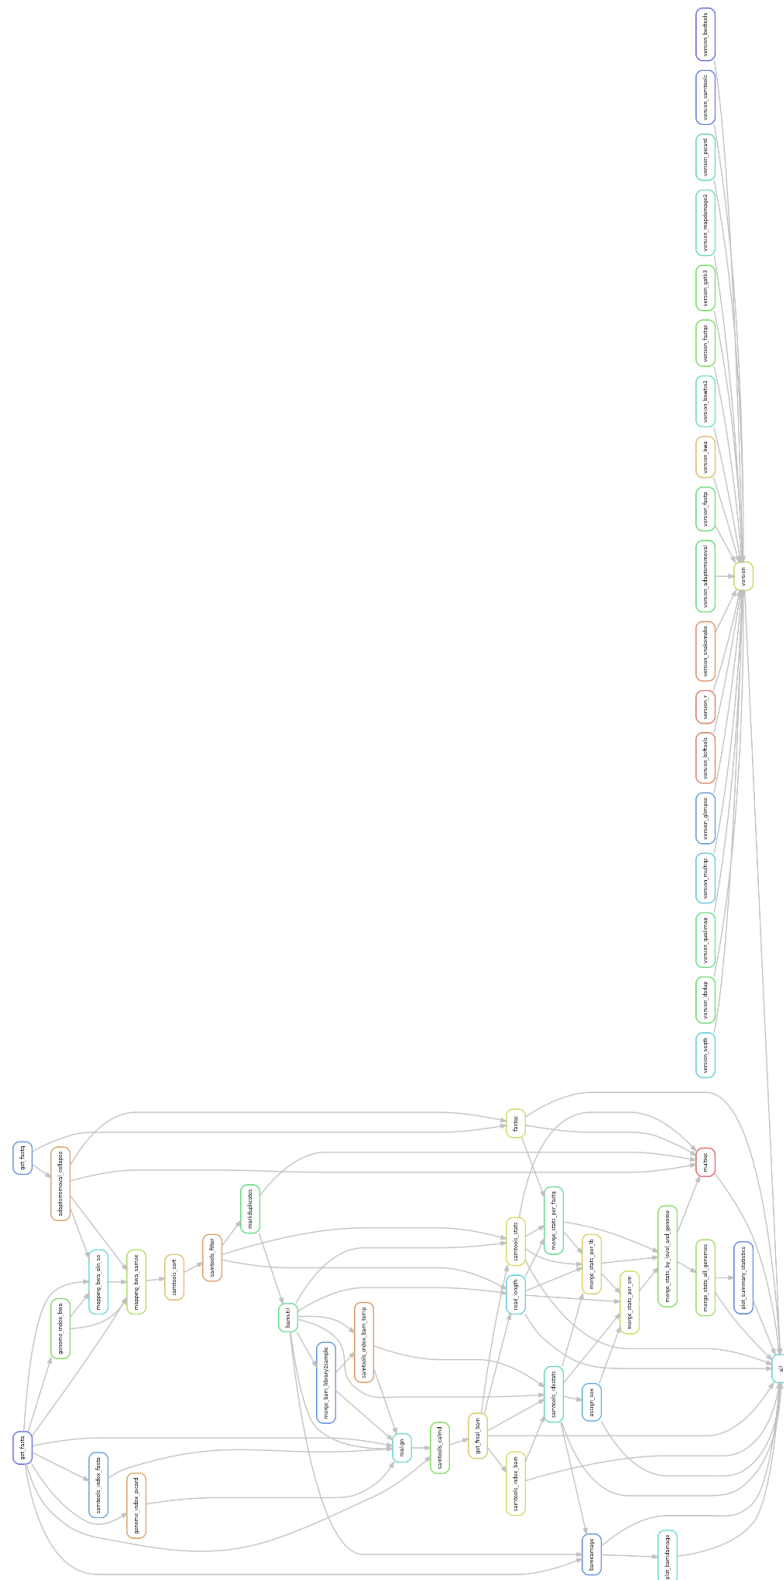

**Supplementary Figure S27.** Rulegraph of the mapache pipeline used in this study, as produced by snakemake. The graph depicts the second mapache run that includes bamUtil.



Initial analyses using the raw reads were performed at three levels: (a) at the FastQ level corresponding to the sequencing reads in each FastQ file, (b) at the library level, corresponding to multiple BAM files from the same (PCR amplified) library, and (c) at the level of individuals, corresponding to multiple BAM files from the same individual. All analyses were performed as implemented in the mapache v.0.3.0 commit f1316e1 [59] pipeline (**Supplementary Figure S27**) by using the snakemake v.7.18.2 workflow manager [60] with parameter `--notemp` to retain intermediate files that are required for downstream analyses (e.g., the BAM files at the FastQ or the library level). In order to ensure reproducibility of the results, our mapache configuration (config.yaml) and samplelist files are available at <https://doi.org/10.5281/zenodo.10848927>.

Note that pre-screening data were exclusively used to identify the most promising libraries for deep sequencing and are not included in the final dataset (i.e., not merged with the deep sequencing data).

All computational analyses were conducted on an AMD EPYC 7452 system with 64 physical cores and 1 TB of RAM running Ubuntu 20.04.6 LTS.

### 3.2.1 Analyses at the FastQ level

We received already de-multiplexed sequences from the sequencing facility. De-multiplexing relied on the two 6- to 8-bp barcodes of each double-indexed library. Initial quality control was performed for each FastQ file using FastQC v.0.11.9 (<http://www.bioinformatics.babraham.ac.uk/projects/fastqc/>). Using AdapterRemoval v.2.3.2 [61] the raw sequences were filtered using a base quality of 2 [default value; values > 2 yield a larger amount of short sequences that will not be propagated to the mapping step; stricter base quality filtering (Illumina proposed values of >20-30 that equal to 0.01-0.001 error probability) is applied *after* mapping (see downstream analyses)] to remove low quality bases from the read ends, trimmed for Illumina adapters and stretches of ambiguous bases (Ns). Paired-end reads were merged by requiring at least 11 bp (default value; a corresponding parameter exploration with 9 up to 11bp showed no substantial difference in results) overlap between the pairs, whereas merged reads shorter than 30 bp were discarded to avoid mere random matches [see e.g. 62] in the next step (parameters used: `--trimqualities --gzip --trimns --collapse --minalignmnetlength 11 --minlength 30`). Only the output with fully (non-truncated) collapsed reads was used for downstream analyses. FastQC was then used again to verify that (i) trimming was successful and (ii) to assess the post-adapter-removal quality of the reads.

The merged reads were mapped to the 1000 Genomes project version of the human reference genome *hs37d5* [63] using BWA v.0.7.17 [64] and the *aln/samse* algorithm using settings optimized for aDNA reads, including disabling the seed length (`-l 1024`) and using `-n 0.01` (the fraction of missing alignments given a 2% uniform base error rate) and `-o 2` (maximum number of gap openings) to allow for higher sensitivity [65] and to minimize reference bias in downstream population genomics analyses [66]. Informative read groups (RG) were also added during the above step (using `-r`) to keep track of PCR-parallels. SAMtools v.1.14 [67] was used to sort the uniquely mapped reads by chromosome order (*sort* function) and to filter them using the *view* function for a mapping quality of 30 (`-q30`) such as to only keep alignments with but a few mismatches, remove reads with flag 4 (denoting an unmapped read) in their header (`-F4`), and index (*index* function) the final BAM file. Note that

indexing was also performed in all BAM outputs generated by the intermediate steps outlined below.

Trimming and mapping metrics reported by mapache at the FastQ level include (a) the absolute number and proportion of fully collapsed reads from the total number of raw reads (reported by mapache as `trim_prop` and `reads_trim`, respectively), as well as their mean length (`length_reads_trimmed`) and (b) the absolute number and the proportion of mapped reads - including duplicates - from the total number of raw reads, known as *mapped content* (reported by mapache as `mapped_raw` and `endogenous_raw`, respectively), as well as their mean length (`length_mapped_raw`). All of the above metrics are provided in **Additional file 2**.

### 3.2.2 Analyses at the library level

Multiple BAM files from the same library were merged with SAMtools *merge*. Duplicated sequences (PCR clones and single amplification clusters incorrectly detected as being multiple clusters by the sequencer's optical sensor; also known as optical duplicates) at the library level were removed using the *MarkDuplicates* function of the Picard software tool [68].

Mapping metrics calculated by mapache at the library level included the same metrics as at the FastQ level, but also (a) the absolute number and proportion of duplicate reads in the overall number of mapped reads (reported by mapache as `duplicates` and `duplicates_prop`, respectively) and (b) the absolute number and proportion of uniquely mapped (non-duplicate) reads in the overall number of reads, known as *useful mapped content* (reported by mapache as `mapped_unique` and `endogenous_unique`, respectively), as well as their length (`length_mapped_unique`). In addition, we manually calculated (c) the *endogenous DNA content* (ratio of number of mapped reads, including duplicates, over the number of fully (non-truncated) collapsed reads), (d) *the efficient endogenous DNA content* (number of mapped reads, excluding duplicates, to the number of fully collapsed reads). All mapping metrics mentioned above are provided in **Additional file 2**.

Based on a visual inspection of the damage plots (see below) and to avoid incorporating incorrect sequence information caused by *post-mortem* deamination at either end of the reads, we soft-clipped (a) six bases at either ends of each read in libraries obtained by shotgun sequencing *without* UDG (USER<sup>TM</sup>) treatment and (b) two bases at either ends of each read from libraries treated *with* UDG. Soft clipping was performed using the *trimBam* function of bamUtil v.1.0.15 [69].

To investigate the level of *post-mortem* DNA degradation, such as DNA fragmentation and deamination (C-to-T for both ds- and ss-libraries and G-to-A transitions for ds-libraries only), the uniquely mapped deduplicated sequences were analyzed with a modified version<sup>7</sup> (see [https://github.com/sneuensc/mapache/wiki/3.-Config-file-\(parameters\)](https://github.com/sneuensc/mapache/wiki/3.-Config-file-(parameters))) of bamdamage [70] as implemented in the mapache pipeline using 10,000 reads per BAM file. By default, mapping quality and base quality thresholds were set to 30 and 20, respectively, in order to keep well-aligned and high-quality reads only. Deamination damage values are provided in **Additional file 3**.

---

<sup>7</sup> the following changes were made:

- speed up: there is now a subsampling (every nth alignment) if desired. Can be specified in the config file.
- Output is not just the pdf, but also the underlying data. The figure is improved and the y-axis of R1 and R2 have the same scale.

Note that in the mapache pipeline, the bamUtil program is executed before mapdamage. Thus, in order to properly estimate deamination damage, the mapache pipeline was run twice as described in the next section.

### 3.2.3 Analyses at the individual level

Multiple BAM files from the same individual were merged via the SAMtools *merge* function. We did not remove identical sequences at the individual level as these represent original DNA fragments from different cells of the same individual, rather than duplication artifacts from our analysis procedure. Local indel re-alignment was performed at the individual level using the RealignerTargetCreator and IndelRealigner tools of GATK v.3.8 [71] after recomputing the MD tag using the SAMtools *calmd* function. The mean genome depth (as well as that of the X and Y chromosomes and of the human mitogenome) coverage was determined at the individual level using Qualimap v.2.2.2d [72]. Mapping metrics calculated by mapache at the individual level were the same as those mentioned for the library level, as well as the mean depths of coverage. All mapping metrics mentioned above are provided in **Additional file 2**. Overall, the total raw sequences per individual ranged from 77232103 to 2379802838, the proportion of fully collapsed reads was between 65.45% and 84.21%, the mapped content varied between 1.27% and 48.42% with a proportion of duplicated reads ranging from 16.57% to 27.80%. The mean coverage depth exceeded  $\sim 0.05\times$  ( $0.07 - 6.31\times$ ) for all 26 individuals.

Genetic sex inference was performed using two approaches. First, we used the Rx method [73] as implemented in mapache. This method relies on the ratio of the normalized X-chromosome coverage depth to the normalized autosomal depth. Secondly, we manually applied (not in the mapache pipeline) the Ry method [74] using the python script provided by the authors (the input was piped via SAMtools *view*). This method is based on the ratio of the reads mapped exclusively to Y, and to both, X, and Y chromosomes, respectively. The results are provided in **Additional file 3**. Overall, the genetic sex inference analyses confirmed that nine individuals were males and 17 were females. Both methods used mostly agreed with each other (albeit the Ry method failed to assign sex in three cases).

As mentioned above, in the mapache pipeline the program bamUtil is executed at the library level *before* mapdamage. Thus, the mapache pipeline was run twice: (a) First, we disabled the bamUtil program in the mapache configuration file. The BAM files of the run containing *post-mortem* damage were not used for downstream analyses, with the exception of a mtDNA-based contamination estimation analysis (see section 4.3). (b) For the second run, we renamed the main output directories of mapache (*0\_2\_library*, *0\_3\_sample*), enabled bamUtil, and generated the BAM files at the library and individual level using data without *post-mortem* damage. We used these BAM files for downstream population genomics analyses.

All individuals' genetic data were characterized by an ancient-like DNA signature. More specifically, in the USER-treated libraries, the C-to-T and G-to-A deamination damage at the two first bases of the read ends showed a "spike" pattern, with the C-to-T damage at the first base of the 5' end of the reads (**Additional file 3**) ranging (among the different libraries) from 7.74% to 36.97%. The two non-USER-treated libraries (256\_1\_B\_lys2\_ex1\_lib2 and 299\_B\_lys1\_ex1\_lib1) displayed the classic "smiley" pattern and their 1st-base-5'-end C-to-T damage was 54.09% and 42.30%, respectively. In conjunction with the deamination damage, the mean fragment length of the deduplicated mapped reads of each library (**Additional file 2**) correspond to the characteristics of degraded DNA, ranging from  $\sim 39$  bp to  $\sim 80$  bp (collapsed-reads; 150 sequencing chemistry was used). As expected, the damage plots at the

1011 library level did not show the deamination effect for the second run, in which bamUtil was  
1012 used.



### 3.3 Contamination estimation

**Nikolaos Psonis**

Genome authenticity was further verified by using four distinct contamination estimation approaches, all performed at the individual level. One approach is X-chromosome-based, one is nuDNA, and two are mtDNA-based. In the analyses below, indexing of BAM and FastA files was performed with the SAMtools *index* and *bwa index* functions, respectively.

First, we performed an mtDNA-based contamination estimation by using contamMix v.1.0-10 [76] with a minimum base quality filter of 30 (default value) to only retain bases of good quality and a set of 311 modern mitochondrial genomes from around the globe [77] serving as sources of potential contamination. For this method, it is necessary to construct the consensus mtDNA sequence from the BAM files. To this end, the majority-rule consensus sequence was computed with ANGSD v.0.941-6-g67b6b3b [78] using the following parameters: `-doCounts 1 -minMapQ 30 -minQ 30 -doFasta 2`, in order to exclusively use well-aligned reads. Hence, as input files in contamMix we used: (a) `--samFn` (BAM format): mitochondrial mapped reads (MT-reads) from the full alignment file with clipped deaminated bases (second mapache run; see above), extracted using SAMtools *view* and (b) `--malnFn` (FastA format): a multiple sequence alignment (MSA) containing the consensus mitogenome above and the aforementioned 311 worldwide modern mitochondrial genomes. The MSA was computed with the automatic mode of mafft v.7.505 [79].

Secondly, we performed a second, independent mtDNA-based contamination estimation with schmutzi v.1.5.6 [80]. MT-reads from the full alignment file that contained deaminated bases (first mapache run; see above), were extracted using SAMtools *view* and realigned against rCRS only (using *bwa* and SAMtools; same parameters as in **Section 3.2**) as proposed by the software developers. Recomputing the MD tag of the mtDNA BAM files that provides information about the reference base and is used for SNP/indel calling without taking into account the reference was performed with SAMtools *calmd*. According to the workflow recommended by the developers for ancient samples, we first applied the *contDeam* method to estimate initial contamination and endogenous deamination rates. Depending on the library type, we set the `--library` option to single or double and we also considered only two bases at both read ends as being deaminated (`--lengthDeam 2`). Following this, we called the actual schmutzi method (*mtcont*), that is, the iterative procedure without the prediction of the contaminant (`--notusepred`), but also with contaminant prediction. As potential contamination sources we used a database of 197 mitochondrial allele frequencies that are provided with the schmutzi software.

Thirdly, we used an X-chromosome-based contamination estimation on XY samples by using the contamination function of ANGSD based on haploid X-chromosomal regions (X:50000000-154900000). First, we ran ANGSD with the options `-minMapQ 30`, `-minQ 30`, `-doCounts 1`, and `-iCounts 1`, in order to only use well-aligned reads. Then, we executed contamination providing the publicly available HapMap file HapMapChrx.gz (<https://github.com/ANGSD/angsd/tree/master/RES>).

Finally, we used ContamLD, an autosomal contamination estimation software that utilizes the fact that contamination breaks down the expected patterns of linkage disequilibrium in the endogenous genome. As a 1000G panel we used the TSI (Toscani, Italy) one (1240K panel available here: <https://reichdata.hms.harvard.edu/pub/datasets/release/contamLD/>).

1058 All contamination estimation analyses mostly supported each other (**Additional file 3**)  
1059 resulting in >98.49% authenticity levels in ContamMix, <4% contamination estimates in  
1060 schmutzi (if analysis applicable; both with and without `--notusepred`), and <1.62%  
1061 contamination estimates based on X-chromosome in XY samples. ContamLD resulted in  
1062 negative contamination estimates (damage correction version) and a “Model\_Misspecified”  
1063 warning, which according to the developer this usually means the coverage is very low and  
1064 the estimate might not be reliable. Changing the panel to CEU did not change the end result.

## 3.4 Uniparental haplogroup estimation

**Nikolaos Psonis**

The classification to mitochondrial and Y-chromosomal haplogroups was performed using data at the individual level from reads with clipped deaminated bases (second mapache run; see above).

### 3.4.1 mtDNA

We generated the mtDNA consensus sequence for each individual by using the MT-reads from the BAM file after mapping against *hs37d5* (extracted with SAMtools *view*). The majority-rule consensus sequence in both cases was called with ANGSD using the following parameters: `-doCounts 1 -minMapQ 30 -minQ 30 -setMinDepth 2 -doFasta 2`, in order to only use well-aligned reads and avoid misincorporation of sequencing errors. The classification to haplogroups was performed with the webtools HaploGrep3 v.3.3.2.1 [81] and HaploCart v.1.0 [82] for the sake of comparison and cross-validation. The results are given in **Additional file 3**. The mitochondrial haplogroup assignment by the two methods used was almost identical, albeit in a few cases (10/26), the two methods produced different assignments to the most external leaf of the mitochondrial tree.

The LBA Ammotopos samples were assigned to the J1c(or 2) and T2b3 haplogroups. Amvrakia included H15a1b, T1a4, and U5a1g1 during the Archaic period, H, K1a2, N1a1a1(or b), and T2b(6 or 3c) during the Classical period, and H46, J2b1(or a) and W(+194 or 9) during the Hellenistic period. An additional individual from the late Classical - Hellenistic times was assigned to the H5a(3 or 3a) haplogroup. Finally, Tenea included T1a4 during the Archaic period, T2n and U3a3 during the Hellenistic period, and N1a1a(+152 or 2), U1a1c(or 1), and U3a3 during the Roman period.

According to the Allen Ancient DNA Resource (Version 8; aadr\_v.54.1.p1\_1240K\_public; [83]), the aforementioned haplogroups have been observed: a) J1c in multiple individuals in Neolithic to Medieval Europe and Middle East, including IA Greece, b) J1c2 only in Neolithic to Medieval Europe, but not in Greece, c) T2b3 in prehistoric Europe, but not in Greece, d) H15a1b, in only one individual in LBA-EIA Armenia, e) T1a4 only in a couple of Neolithic to Medieval Europe, but not in Greece, f) U5a1g1 in prehistoric Eurasia, but not in Greece, g) H in individuals in Neolithic to Medieval Europe and Middle East, including Neolithic, BA, but also Roman Greece, h) K1a2 in individuals in Neolithic to Medieval Europe and Middle East, including Neolithic and BA Greece, i) N1a1a1 predominantly from Neolithic Europe, but not in Greece, j) N1a1a1b has not been observed, k) T2b6 has not been observed, l) T2b3c only in Neolithic Ireland, m) H46 in prehistoric Europe, but not in Greece, n) J2b1 in prehistoric and historical Europe and Middle East, but not in Greece, o) J2b1a in Neolithic to Medieval Europe, but not in Greece, p) W194 in prehistoric Europe, but not in Greece, q) W9 only in one individual from Ottoman Anatolia, r) H5a3 in BA Germany, only, s) H5a3a in a couple ancient European individuals, but not in Greece, t) T2n has not been observed, u) U3a3 only in BA Jordan, v) N1a1a+152 in prehistoric Europe and Middle East, but not in Greece, w) N1a1a2 has not been observed, x) U1a1c in prehistoric and historical West Asia, and y) U1a1c1 in BA Iran and in Medieval Russia.

### 3.4.2 Y-chromosome

Classification into Y-chromosomal haplogroups was performed using Yleaf v.3.1 [84] with a minimum read quality of 30 (`-q 30`), a minimum percentage of a base result for acceptance of 90 (`-b 90`), in order to only use well-aligned reads and avoid misincorporation of sequencing errors and the *hg19* reference genome (`-rg hg19`) and its accompanying `predict_haplogroup.py` python script. The minimum prediction score was 0.95 (set by default). This version of Yleaf uses YFull (v.10.01) for the underlying haplogroup tree structure.

For the sake of comparison and verification, we also used Yhaplo v.1.1.2 [85]. First, by piping the BCFtools v.1.15 [86] *mpileup* and *call* modules, we called and filtered SNPs found at the Y chromosome (`-r Y`), kept bases with base quality  $\geq 30$  (`-q 30`) and reads with mapping quality  $\geq 30$  (`-Q 30`) to ensure that only well-aligned reads were used, and we downgraded mapping quality for reads containing excessive mismatches (`--adjust-MQ 50`; value recommended by the developers) to avoid keeping (small, ancient) reads that originate from another region or a different species. We also set ploidy to 1 (`--ploidy 1`; Y-chromosome is haploid) and selected the multiallelic caller (`-m`) designed for rare-variant calling. Then, using the BCFtools *norm* module, we performed normalization (left-alignment and normalization of indels; check if REF alleles match the reference; split of multiallelic sites into multiple rows; recovery of multiallelics from multiple rows). Finally, we ran Yhaplo with the `-aao` parameter in order to generate all auxiliary outputs. Yhaplo uses the ISOGG Y-DNA Haplogroup Tree (2016.01.04; <https://isogg.org/tree/>). The results are given in **Additional file 3**. The Y-chromosome haplogroup assignment to the major haplogroups by the two methods used in the present study was identical (9/9). However, due to partial coverage of the Y-chromosome, the estimated haplogroups may not represent the assignment of the samples to the most external node of the Y-chromosomal tree.

The male LBA Ammotopos sample was assigned to G2a2b2a1a1c1a, the male Amvrakia samples were assigned to J2 and T1a2 (Classical period) and E1b1b1 (Hellenistic period), and the male Tenea samples were assigned to T1a2 (Archaic period), E1b1b1a1b1 (Hellenistic period), and R1b1a2a2a and J2a1b1 (Roman period). The Allen Ancient DNA Resource (Version 8; `aadr_v.54.1.p1_1240K_public`; [83]) does not include entries from prehistoric or historical Greece for any of the aforementioned haplogroups.



## 3.5 Population Genomics analysis

**Stefanos Papadantonakis, Angelos Souleles, Pavlos Pavlidis, Angeliki Papadopoulou, and Nikolaos Psonis**

### 3.5.1 Lists of genomic sites

We used two different lists of genomic sites, one containing ~1.24 million sites, known as 1240K [87] that is extensively being used in human archaeogenomics research, and another one containing ~5 million sites (5M\_auto; 5M hereinafter) that was recently generated [88]. The lists are provided at <https://doi.org/10.5281/zenodo.10848927>.

### 3.5.2 Genotype calling and pseudohaploidization

For each of the aforementioned two lists of genomic sites (see section 4.5.1), SNP calling (in pileup format) per individual was performed with the SAMtools *mpileup* function by providing the position of sites in the reference genome, disabling the per-Base Alignment Quality, known as BAQ (-B) to reduce reference bias, ignoring read groups (RG) tags (one BAM = one sample), and skipping alignments and bases with mapping and base quality, respectively, smaller than 30, to only retain the well-aligned reads. Random pseudohaploidization was performed with the *pileupCaller* module of SequenceTools v.1.5.2 (<https://github.com/stschiff/sequenceTools>) by providing the pileup file and an EIGENSTRAT snp file with the positions of each list of genomic sites, using the `--randomHaploid` parameter, and selecting EIGENSTRAT as output format. The sex field in the output individual (ind) file was annotated using the result of the genetic sex inference above (see section 4.2). Calculation of coverage depth for the distinct lists of genomic sites was performed with the `eigenstrat_snp_coverage.py` v.1.1.0 python script (<https://github.com/TCLamnidis/EigenStratDatabaseTools>).

We merged individual EIGENSTRAT files to assemble different datasets (see below) with the EIGENSOFT v.7.2.1 [89] *mergeit* function and converted them to PACKEDPED (BED) files with the *convertf* function of the same software package.

### 3.5.3 Genetic relatedness analysis

To assess genetic relatedness, we used two different approaches developed for aDNA data, Relationship Estimation from Ancient DNA (READ) [90] and KIN v.3.1.3 [91]. READ can estimate up to 2nd-degree genetic relationships, whereas KIN identifies up to 3rd-degree genetic relatives provided at least 0.05× sequence coverage. KIN can also disentangle siblings from parent-child pairs. As lists of genomic sites we used both, the 1240K, and 5M lists for the sake of comparison [following the procedure outlined in 92]. For the READ analysis, we first extracted the 22 autosomal chromosomes (only for the 1240K panel, 5M includes only autosomal sites) using PLINK v.1.90b6.21 [93] and selected tped as output format (`--recode transpose`). Then, we executed READ using the median normalization method to decrease the influence of outliers. For the KIN analyses, we used the *KINgaroo* module without contamination correction (`-cnt 0`) to generate the input files from bamfiles for the *KIN* module that followed. Although we report all resulting genetic relationships (<https://doi.org/10.5281/zenodo.10848927>), we considered only those as being valid, which yielded  $|Z| > 1$  for READ and  $\Delta LL > 1$  for KIN, as proposed by the respective tool developers. We discovered three cases of genetic relatedness, two in Ancient Amvrakia, and one in ancient Tenea:

#### Case 1 - Classical Amvrakia

Grave CV (**Supplementary Figure S28**) contained two individuals (Amv\_Epi\_CI\_5 and Amv\_Epi\_CI\_6) dated to the Classical period (375-350 BCE). Both individuals were anthropologically estimated to be children (2-12 years old), whereas their genetic sex was inferred as being female for both (XX; **Supplementary Table 3; Additional file 3**). They also shared the same mt-DNA haplogroup (K1a2; **Supplementary Table 3; Additional file 3**). These two Individuals were inferred, by both READ and KIN, as 1st-degree genetic relatives, with KIN identifying them as siblings. Hence, these two individuals can confidently be recognised as sisters.

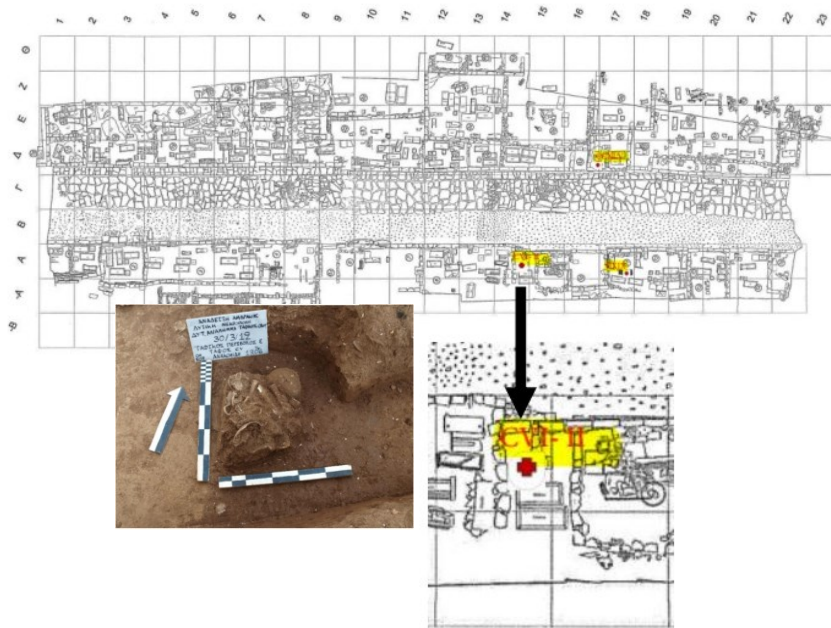

**Supplementary Figure S28.** The location of grave CV in the western necropolis of Ancient Amvrakia and the CV1 burial (retrieval).

Additionally, these two sisters were inferred (by both READ and KIN) to also have 2nd-degree genetic relationships with a third individual (Amv\_Epi\_CI\_1), found in a nearby grave (CXIX A; retrieval; **Supplementary Figure S29**) dated to around the same time (375-350 BCE). Anthropologically, this individual was estimated to be a young (20-34 years old) female (confirmed by genetic sex analysis; **Supplementary Table 3; Additional file 3**) and it belongs to a different mtDNA haplogroup (N1a1a1; **Supplementary Table 3; Additional file 3**). Hence, this individual could either be an aunt or the grandmother of the sisters (from their father's side), or their stepsister from a different mother. Based on the dating of these three burials and the age-at-death of Amv\_Epi\_CI\_1, the second scenario (grandmother-granddaughters) seems the least possible (although feasible).

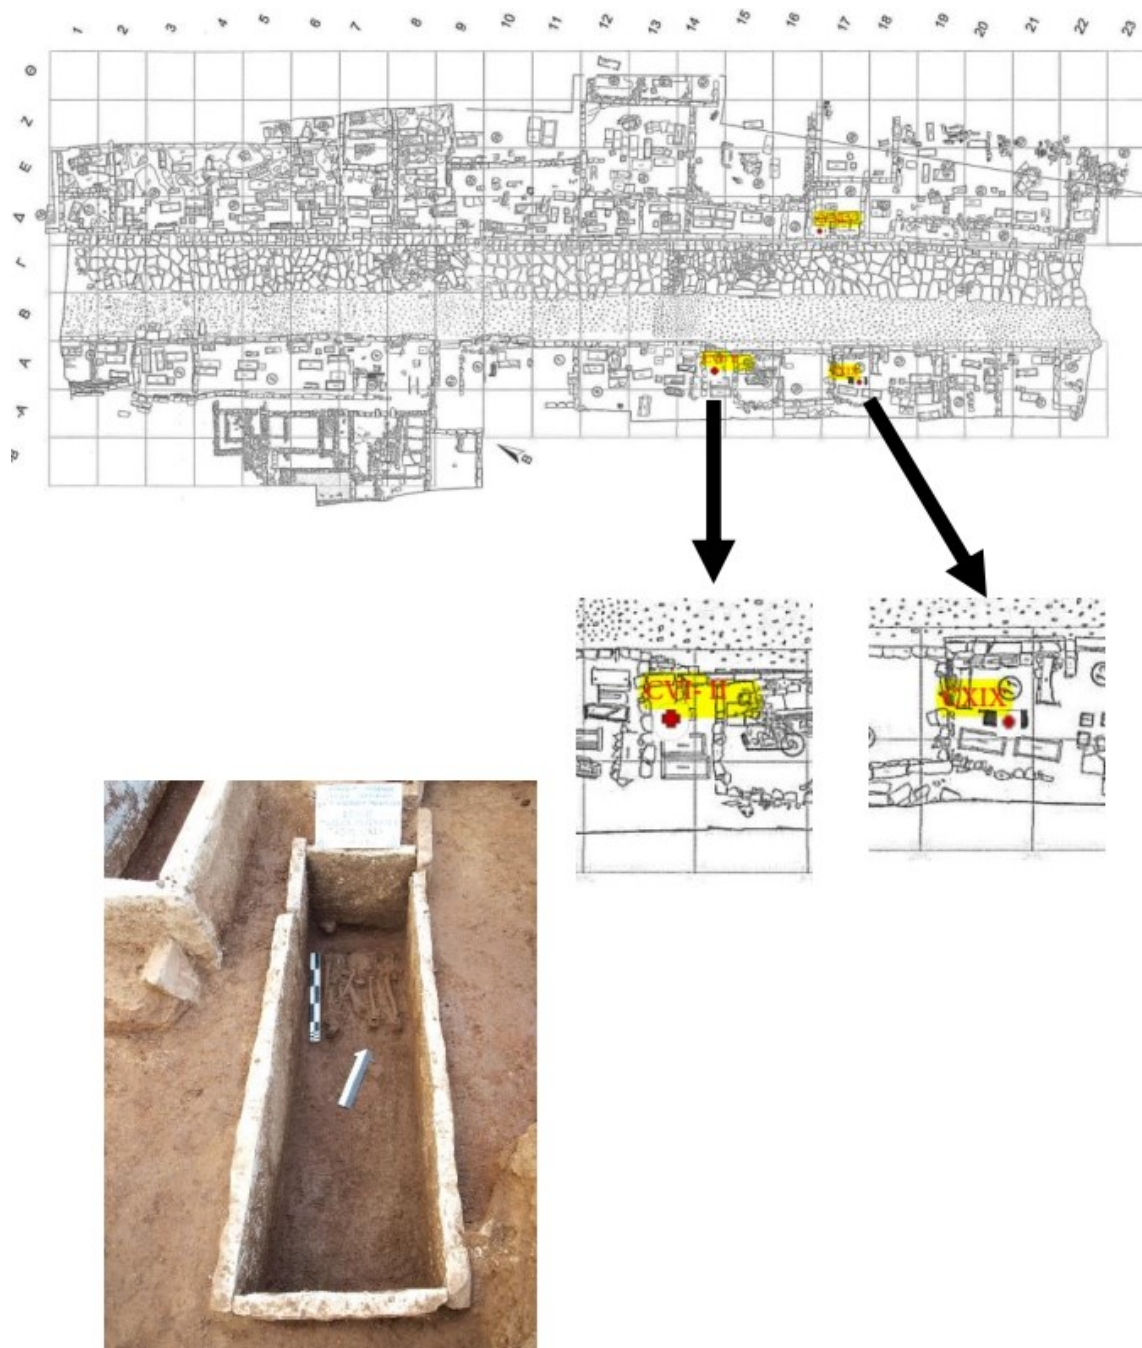

**Supplementary Figure S29.** The location of grave CXIX in the western necropolis of Ancient Amvrakia and the CXIX A burial (retrieval).

Case 2 - Hellenistic Amvrakia

Grave CCXLV (**Supplementary Figure S30**) contained two individuals (Amv\_Epi\_Hel\_3 and Amv\_Epi\_Hel\_4) dated to the Hellenistic period. They were buried with a small chronological difference (175-125 BCE), as the burial of Amv\_Epi\_Hel\_3 is a retrieval, whereas the one of Amv\_Epi\_Hel\_4 is a primary burial. Anthropologically, the first individual was estimated to be an old (>50 years old) male (possibly), whereas the second individual was also old (>50 years old), albeit the sex could not be determined. According to our genetic analyses, both individuals were females and share the same mtDNA haplogroup (W+194) (**Supplementary Table 3; Additional file 3**). READ and KIN inferred them to have a 1st-degree genetic relationship, with KIN indicating a parent-child relationship. Based on the fact that the burial of Amv\_Epi\_Hel\_3 is a retrieval, we consider it most likely that this individual was the mother and Amv\_Epi\_Hel\_4 the daughter, although the grave dating and the age-at-death cannot exclude the opposite.

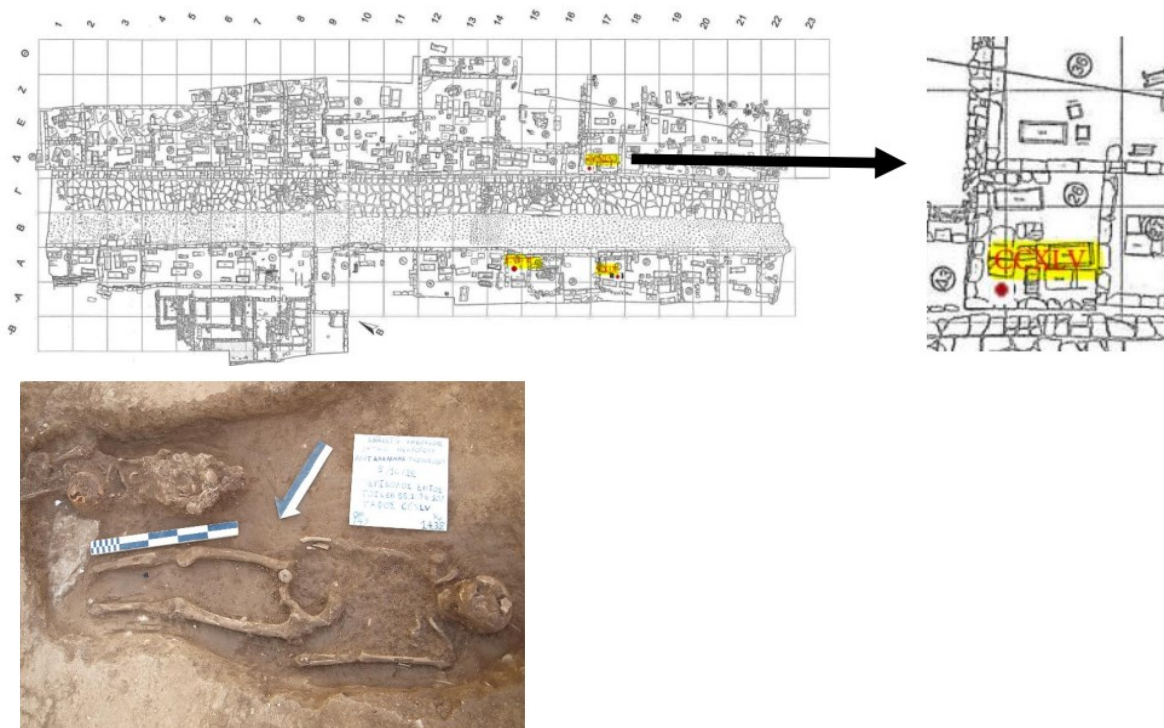

**Supplementary Figure S30.** The location of grave CCXLV in the western necropolis of Ancient Amvrakia and the two burials (retrieval and primary).



### Case 3 - Archaic Tenea

At the Faneromeni-Kamareta site, two related individuals were found in two neighboring graves (sarcophagi) dated to the Archaic period (**Supplementary Figure S31**). Individual Ten\_Pel\_Arch\_1 was found in grave 5 dated to 500 BCE, whereas individual Ten\_Pel\_Arch\_2 was found in grave 3 dated to 550-500 BCE. The first individual was anthropologically determined to be an old (>50 years old) male, whereas the second a middle-aged (50 years old) female. The genetic analyses confirmed their genetic sex and indicated that they belong to the same mtDNA haplogroup (T1a4) (**Supplementary Table 3; Additional file 3**). READ and KIN inferred their genetic relationship as being of 1st degree, with KIN yielding a parent-child relationship. Given that they share the same mtDNA haplogroup, the most likely scenario is that they are mother (Ten\_Pel\_Arch\_2) and son (Ten\_Pel\_Arch\_1), rather than father and daughter.

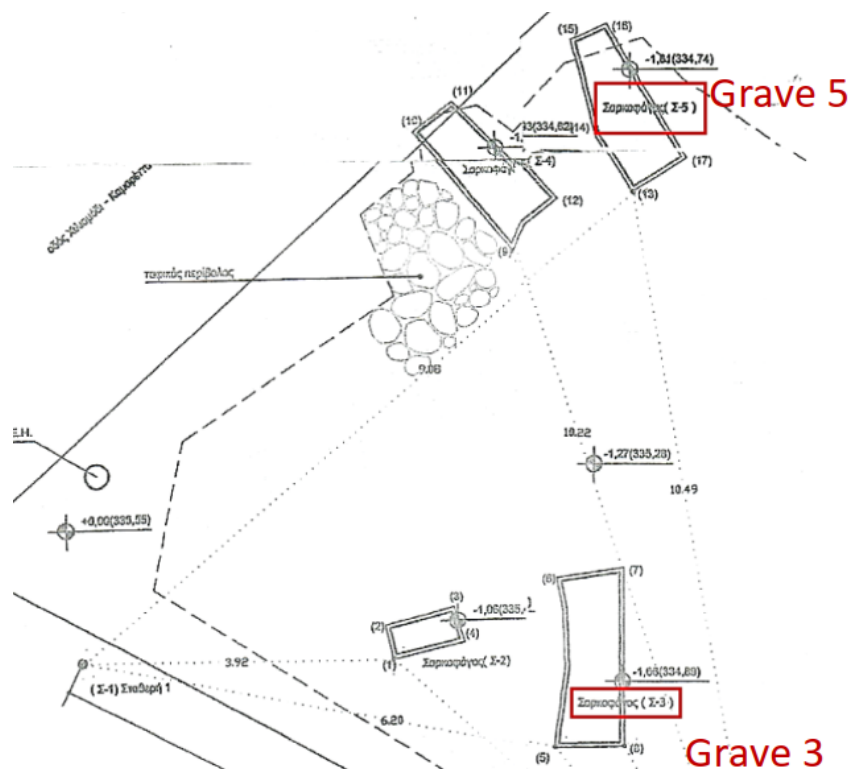

**Supplementary Figure S31.** The location of graves 3 and 5 in the Faneromeni-Kamareta site of Ancient Tenea. Image(s) source: Archive of the Ephorate of Antiquities of Corinth, Ministry of Culture, Greece.

### 3.5.4 Runs of homozygosity

Analyses of per individual Runs Of Homozygosity (ROH) levels were performed using the hapROH v.64 [94] software on the 1240K pseudo-haploid data in EIGENSTRAT format. We applied this method to individuals covering more than 300000 [95,96] sites on the 1240K panel (21/26). We followed the proposed pipeline presented in the Jupyter Notebook file called callROH\_vignette.ipynb (<https://www.dropbox.com/sh/eq4drs62tu6wuob/AABM41qAErmI2S3iypAV-j2da?dl=0>), using the 1000 Genomes Project as a reference panel (in hdf5 format). The output of HapROH, as well as the script are available at <https://doi.org/10.5281/zenodo.10848927>.

**Figure 5** displays the total length of ROH segments exceeding 4 cM that were detected in all the individuals analyzed here. The segments are categorized into four bins based on their length: 4-8 cM, 8-12 cM, 12-20 cM, and >20 cM. Shorter ROH segments in the 4-8 cM bin indicate a small population size, while longer segments in the >20 cM category suggest an isolated population and/or consanguinity practices. Individuals with a total of more than 50 cM of ROHs in the >20 cM category are considered possible offsprings of close kin [94]. **Supplementary Figure S32** presents a linear regression scatterplot showing the relationship between the total sum of ROHs and the genomic coverage of each individual, along with Pearson's  $r$  correlation coefficient. The  $p$ -value  $> 0.01$  indicates no statistically significant correlation between detected ROHs and genomic coverage, indicating that the detected ROHs are not affected by sequencing depth.

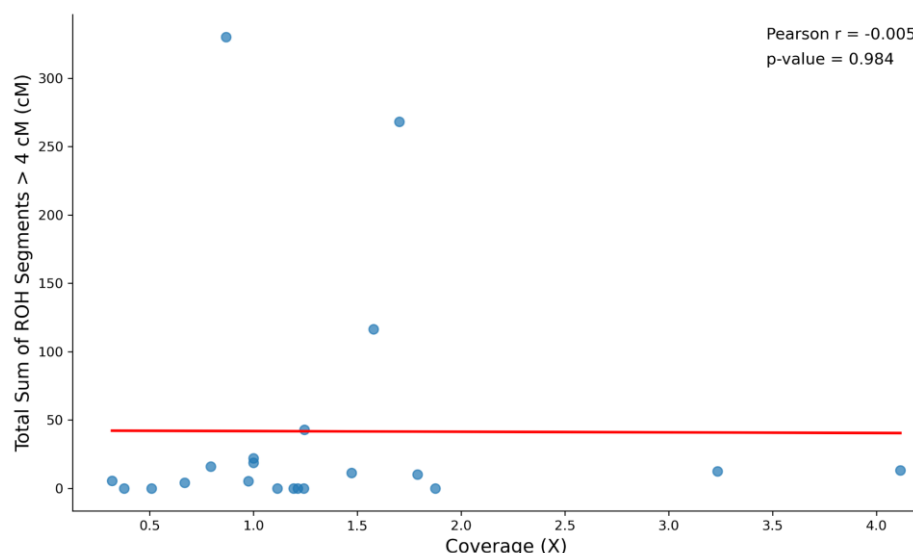

**Supplementary Figure S32.** Linear regression scatterplot showing the relationship between the total sum of ROHs and the genomic coverage of each newly sequenced individual. Estimated Pearson's  $r$  correlation coefficient, as well as  $p$ -value shown in top right corner.

### 3.5.5 Imputation and Identity-by-Descent segments screening

We imputed the newly produced ancient genomes of this study by using the 1000 Genomes phase 3 [63] dataset as a reference and GLIMPSE v.1.1.1 [97]. We first reduced the 1kGP sites list by removing singletons (uninformative for imputation), and keeping only biallelic SNPs with the BCFtools v.1.14 view ( $-m \ 2 \ -M \ 2 \ -c \ 2$ ) module as per [98]. This resulted in a total of 43285119 sites. Then, to generate genotype likelihoods, we used the

ATLAS pipeline v.0.9 [99], by estimating *post-mortem* damage (`task=PMD`) and calculating genotype probabilities (`task=call method=MLE`). The *GLIMPSE\_chunk* function was used to create smaller genomic chunks [window size: 2000000 and buffer-size: 200000 [98]] and *GLIMPSE\_phase* to perform imputation for each chunk. For this step, chromosomal VCF files and a genetic map are required. We used the VCF files produced by ATLAS containing the ~43 million sites and the HapMap phase II NCBI *b37* genetic map [100]. Finally, the chunks were ligated and phased with *GLIMPSE\_ligate* and *GLIMPSE\_sample*, respectively.

To infer shared Identity By Descent (IBD) segments between pairs of individuals in our dataset, we used the *ancIBD* v.0.5 tool [101], following the recommended by the developers processing procedure for our newly sequenced WGS data with at least 0.25× coverage (22 out of 26; *Amv\_Epi\_CI\_3*, *Amv\_Epi\_Hel\_2*, *Amv\_Epi\_Hel\_5*, and *Ten\_Pel\_Rom\_4* were excluded). Firstly, as *ancIBD* parameters are optimized for the 1240K list of genomic sites, the phased/imputed data were reduced only to those sites. In addition the VCF files were transformed into *hdf5* format. Both of these processes were conducted using the *ancIBD.IO.prepare\_h5.vcf\_to\_1240K\_hdf* function. Then, the IBD segments were called using the *hapBLOCK\_chroms* function with standard parameters used (`l_model='h5'`, `e_model='haploid_gl2'`, `h_model='FiveStateScaled'`, `t_model='standard'`, `p_col='variants/AF'`, `ibd_in=1`, `ibd_out=10`, `ibd_jump=400`, `min_cm=6`, `cutoff_post=0.99`, `max_gap=0.0075`), as proposed by the software developers. Finally, the *create\_ind\_ibd\_df* function was used to create summary data for the pairwise shared IBD segments and to perform a quality control filtering, by removing IBD segments of low SNP density (IBD segments with less than 220 SNPs per centiMorgan). The inferred IBD segments are categorized by length into four groups: 8-12 cM, 12-16 cM, 16-20 cM, and greater than 20 cM. Segments longer than 20 cM indicate closer relatedness, as only a few meiotic events are required to break up such long segments, whereas the shorter segments represent genealogical connections that are a few hundred years deep [101]. The output of *ancIBD*, as well as the script used are provided in <https://doi.org/10.5281/zenodo.10848927>. The number of shared IBDs within each of the four length bins, in a pairwise fashion, is presented in **Figure 3**.

Shared IBDs segments for the >20 cM bin indicate a) the individuals determined by READ and KIN (see **Section 3.5.3** above) to have a 1st- (*Amv\_Epi\_CI\_-5* and -6; *Amv\_Epi\_Hel\_-3* and -4; *Ten\_Pel\_Arch\_-1* and -2) and 2nd-degree (*Amv\_Epi\_CI\_-5* and -6 with *Amv\_Epi\_CI\_1*) genetic relationship (yellow and green colors in **Figure 3A; upper-right plot**) as being closely related, b) a relationship of intermediate genetic kinship (a few generations apart) among three Roman Tenea individuals (*Ten\_Pel\_Rom\_-1*, -2, and -3; petrol colors in **Figure 3A; upper-right plot**), and c) distant kin relationships (several generations apart) between Archaic and Classical Amvrakia individuals (*Amv\_Epi\_Arch\_3* with *Amv\_Epi\_CI\_-5* and -6; *Amv\_Epi\_Arch\_2* with *Amv\_Epi\_CI\_4*), between Archaic Amvrakia individuals (*Amv\_Epi\_Arch\_-1* and -3), and between Classical Amvrakia individuals (*Amv\_Epi\_CI\_-4* and -6). Shared IBD segments for the 16-20 cM bin (**Figure 3A; bottom-left plot**), in addition to the above relationships, also indicate some degree of distant genetic relationship between other pairs of Classical Amvrakia individuals (*Amv\_Epi\_CI\_1* with *Amv\_Epi\_CI\_-6* and -5, respectively). Shared IBD segments in the 12-16 cM and 8-12 cM bins, also indicate the presence of strong ancestral genetic links (yellow, green, petrol, and blue colors in **Figure 3B**) a) between Archaic Amvrakia and Archaic Tenea (*Amv\_Epi\_Arch\_-1*, -2, and -3 with *Ten\_Pel\_Arch\_-1* and -2 combination of pairs), b) between Classical Amvrakia and Archaic Tenea (*Amv\_Epi\_CI\_-2* and -4 with *Ten\_Pel\_Arch\_-1* and -2

combination of pairs), c) between Classical Amvrakia and Hellenistic Tenea (Amv\_Epi\_CI\_1 with Tenea\_Pel\_Hel\_1), d) between Archaic Tenea and Hellenistic Tenea (Tenea\_Pel\_Arch\_2 with Tenea\_Pel\_Hel\_1), e) between Classical Amvrakia and Hellenistic Amvrakia (Amv\_Epi\_CI\_-1 and -4 with Amv\_Epi\_Hel\_-3 and -4, respectively), and f) between Hellenistic Amvrakia and Archaic Amvrakia (Amv\_Epi\_CI\_4 and Amv\_Epi\_Arch\_1). Notably, the absence of shared IBD segments is observed a) between LBA Ammotopos and any other sample and b) between Roman Tenea and any other non-Roman sample from either Tenea, or Amvrakia.

### 3.5.6 Merging with public data

The 26 ancient individuals were studied at the population level in the context of previously published data for modern Western Eurasians individuals and prehistoric as well as historic (Iron age to Roman times) ancient individuals. The rationale for this sample selection is a) the inclusion of the spatiotemporally most closely related populations to our newly sequenced individuals and b) the inclusion of more distantly related populations that are required for specific, additional analyses (see below for details). Note that, different analysis types and methods required assembling distinct datasets from this data pool. Details on which sample was used in each analysis (and under which group label) can be found in **Supplementary Table 4 (Additional file 4)**. The details of each dataset assembly are provided in the following:

#### **“Dataset 1”: 670 ancient individuals (published)**

This dataset included a) 547 ancient individuals [102–131] whose data derive from the ‘1240K’ (1233013 sites) SNP capture assay [87] downloaded from the Allen Ancient DNA Resource (Version 8; aadr\_v.54.1.p1\_1240K\_public; [83]) in PACKEDANCESTRYMAP format, b) 1240K data from 111 ancient individuals [132,133] that at the time of manuscript preparation had not yet been integrated into the AADR database ([https://reich.hms.harvard.edu/sites/reich.hms.harvard.edu/files/inline-files/Reitsema2022PNAS\\_Ancient\\_1240K.zip](https://reich.hms.harvard.edu/sites/reich.hms.harvard.edu/files/inline-files/Reitsema2022PNAS_Ancient_1240K.zip); [https://figshare.com/projects/Genotype\\_data\\_for\\_103\\_individuals\\_from\\_study\\_Ancient\\_DNA\\_reveals\\_admixture\\_history\\_and\\_endogamy\\_in\\_the\\_prehistoric\\_Aegean\\_/156152](https://figshare.com/projects/Genotype_data_for_103_individuals_from_study_Ancient_DNA_reveals_admixture_history_and_endogamy_in_the_prehistoric_Aegean_/156152); PACKEDANCESTRYMAP format), and c) WGS data from 10 individuals generated by Koptekin et al. [88] (not in the AADR database, either), which we processed, starting from raw FastQ data (obtained after personal communication with the authors), using the same pipeline as the one used for the 26 samples of the present study (the mapache samplelist file for these 10 individuals is available at <https://doi.org/10.5281/zenodo.10848927>). All individuals fulfill the following selection criteria: a) they were genetically unrelated (above >2nd genetic kinship degree), b) they covered at least 100000 positions of the 1240K list, and c) their contamination assessment in AADR was not tagged as “QUESTIONABLE”. We merged data from these distinct sources into a single PACKEDANCESTRYMAP file using the EIGENSOFT *mergeit* function. This dataset was used in F-statistics analyses (see below).

#### **“Dataset 2”: 664 ancient individuals**

This is the same as “Dataset 1” albeit excluding six Upper Paleolithic Iberomaurusian hunter-gatherers from Tafolrat, Morocco. This dataset was used in the ADMIXTURE analysis (see below). The samples from Tafolrat were excluded from this analysis as two-thirds of their ancestry originates from sub-Saharan Africa [125].

### **“Dataset 3”: 670 ancient and 888 modern individuals**

This dataset included a) 888 modern West Eurasian individuals genotyped on the Human Origins SNP (HO; 597573 sites) array [87]; most of the HO data were downloaded from the Allen Ancient DNA Resource (Version 8; aadr\_v.54.1.p1\_HO\_public; [83]) and the rest are available in [133], both in the PACKEDANCESTRYMAP format, and b) the data from the ancient individuals of “Dataset 1”, albeit restricted to the HO sites. Individuals that were either tagged as outliers (`_o` suffix), as being genetically related, as *to-be-ignored*, and as having been obtained via whole genome amplification (`_wga` suffix) were omitted. This dataset was used in the PCA analysis (see below).

### **3.5.7 Principal Component Analysis**

Principal Component Analysis (PCA) was used to summarize the relationships among our 26 ancient samples in the context of the previously published ancient and modern genomes of “Dataset 3”. PCA was performed using the EIGENSOFT *smartpca* function, default parameters, and the `lsqproject: YES` and `numoutlieriter: 0` options, in order to project the data of the ancient samples onto the PCs calculated for the modern samples, and also, to disable outlier checking and removal, respectively. The stability of the PCA was assessed using Pandora v.2.0.0 [134] using `n_replicates: 100` as suggested by the developers and `kmeans_k: 4` and supplying the `smartpca_optional_settings` field in the configuration file with the aforementioned projection-related options above. Note that the `kmeans_k` setting is of minor importance as we mainly focus on the stability of individuals in the PCAs conducted on the 100 bootstrap replicates. The Pandora Stability estimate was 0.95 (convergence achieved after 25 pseudo-replicates), with an average  $\pm$  standard deviation support value of  $0.89 \pm 0.07$ , and a median of 0.90. Regarding the newly sequenced individuals, their support values were ranging between 0.70 and 0.86, with the exception of the following four individuals: Amv\_Epi\_Cl\_3 (0.67), Amv\_Epi\_Hel\_1 (0.65), Amv\_Epi\_Hel\_2 (0.53), and Ten\_Pel\_Rom\_4 (0.67). Their instability in PCA placement is shown in **Supplementary Figure 33**. Their lack of stability is due to coverage as three out of these four genomes are among the four least covered ones ( $<0.15\times$ ), whereas all of them are among the six genomes with the lowest mean depth coverage ( $<0.32\times$ ).



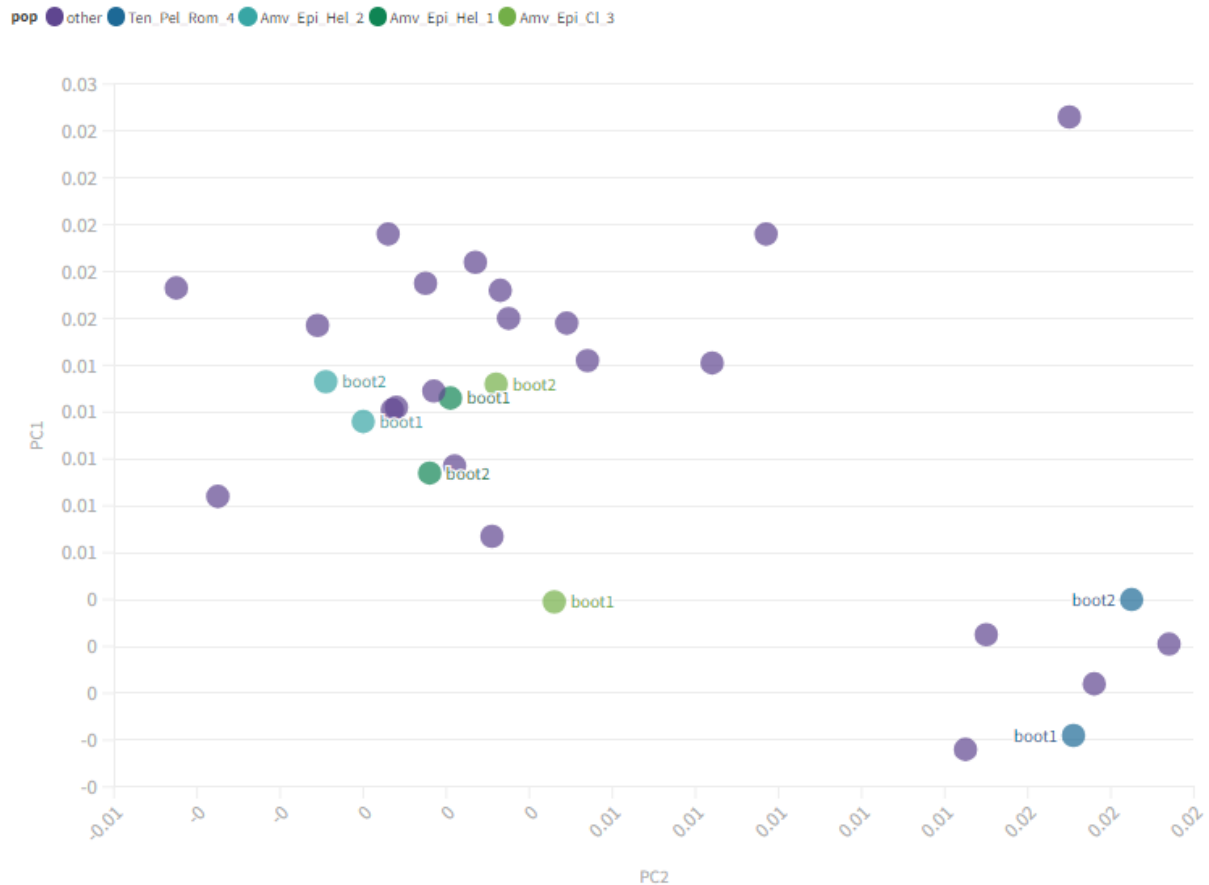

**Supplementary Figure S33.** Plot of two bootstrapped PCA replicates created using Pandora showing the variability in placement of the four newly sequenced individuals with a low Pandora Stability estimate ( $<0.70$ ). For clarity we plot only the individuals of the present study and both of the replicates only for the four focal individuals.

The grouping of samples, which is given in **Supplementary Table 4 (Additional file 4)**, reflects the spatiotemporal and cultural origin of the samples, meaning that each group is a combination of a) present-day countries name (3-digit codes) and b) relative archaeological period (e.g. Neolithic, Late Bronze Age, Archaic, Classical etc). In all cases we have also added the actual temporal range covered. In order to provide clarity to the plot and as we wanted to focus more on the temporal space of the newly sequenced individuals (LBA to Roman times) we merged some earlier (prehistoric) samples into single, genetically homogeneous, groups. As a result of the above, the grouping for the PCA analysis includes groups, such as GRC\_Neolithic\_6400-3600BCE, GRC\_EBA\_EMBA\_MBA\_2900-1700, and GRC\_LBA\_1700-1050BCE, which all three include, both, mainland and insular populations. However, we kept GRC\_Mainland\_WMakedonia\_MBA\_2100-1600BCE as a separate group as its genetic ancestry is quite different from the rest of the Greek MBA individuals [104]. In the cases of other Balkan countries excluding Greece, we merged the prehistoric samples into South\_Balkans\_EBA\_MBA\_MLBA\_3350-1100BCE (Albania, Bulgaria, North Makedonia) and NW\_Balkans\_EBA\_MBA\_MLBA\_2000-800BCE (Croatia, Serbia, Montenegro). Historical times were not merged together (see e.g. MKD\_IA\_900-500BCE and MKD\_Classical\_Hellenistic\_500-50BCE), whatsoever. Other merged groups are Hunter\_Gatherers\_22600-5500BCE (all Paleolithic and Mesolithic HGs), IRN-IRQ\_Neolithic\_Chalcolithic\_9500-3500BCE (Iran/Iraq Neolithics and Chalcolithics), ISR-

JOR\_Epip-Natufian\_and\_PPN\_12000-6200BCE (Natufians and Pre-pottery Neolithics from the Levant), and RUS-BGR-SER\_BA-Yamnaya-like\_3500-1600BCE (individuals with significant Yamnaya-like ancestry). In the case of Italy we divided the groups geographically in Mainland, Sicily, and Sardinia, whereas we also separated the Etruscans (ITA\_Mainland\_Etruscan\_800-001BCE) from other mainland contemporary to them individuals (ITA\_Mainland\_IA\_and\_RomanRepublic\_760-003BCE). In the case of Türkiye, we divided the samples temporarily, but in some cases that the samples of a given period do not cover the entire area of Türkiye we also mention the regions (see e.g. TUR\_South-SouthWest\_MBA\_MLBA\_2000-1200BCE, TUR\_West\_Archaic\_750-480BCE). Note that this grouping does not affect the results and is used only for better visualization.

The result of the PCA projection for the first two PCs is presented in **Figure 2A**. According to the results, the newly generated genomes are, in general, clustered together and overlap with other ancient eastern Mediterranean genomes, albeit they do display considerable variation. Two main clusters are formed, with three additional samples standing out.

The first cluster includes the majority of the Amvrakia samples (one of the three Archaic, all six Classical, and four out of five Hellenistic), the two BA Ammotopos samples and some of the Tenea samples (both of the two Archaic and two out of three Hellenistic). This cluster overlaps mostly with LBA (1700-1050 BCE) genomes from the entire present-day area of Greece, EIA (1100-500 BCE) genomes from present-day area of Bulgaria, as well as with the local population of the Ancient Greek colony of Himera in Sicily (780-400 BCE). Moreover, some additional samples are also placed close to this cluster including a Greek EBA\_MBA (2800-1700 BCE) individual and a Greek IA individual from the Peloponnese (1070-800 BCE). Close, but not overlapping, several other genomes are observed, including most of the Greek EBA\_MBA (2800-1700 BCE) and the rest of the Greek IA (1070-800 BCE and 800-500 BCE, respectively), a few Roman Imperial individuals from the Italian mainland (1-530 CE), a few from the South Balkans EBA\_MBA\_MLBA (3350-1100 BCE), and two more from the IA (900-500 BCE) and Classical-Hellenistic (500-50 BCE) present-day area of North Macedonia.

The second cluster includes all four Roman Tenea individuals, as well as one of the three Hellenistic Amvrakia individuals. This cluster, in comparison to the first one, is placed slightly more towards the bottom left of the PC space and the Iran-Neolithic/CHG - WHG axis. It mostly overlaps with Archaic (750-480 BCE), Roman (27-476 CE), and other Anatolian genomes [including a Hellenistic (510-30 BCE) and an EBA (3350-2000 BCE)], a Roman Imperial (1-530 CE) genome from Italy, as well as a few Greek genomes from the Roman (250-400 CE), the EBA\_MBA (2900-1700 BCE), and the LBA (1700-1050 BCE) times. Close, but not overlapping, are a few additional Greek EBA\_MBA (2900-1700 BCE) and Italian Roman Imperial (1-530 CE) genomes, as well as some EBA (3350-2000 BCE) and Hellenistic (510-30 BCE) genomes from the present-day area of Türkiye.

Between these two clusters, the remaining of the two Hellenistic Tenea individuals are placed, with close affinities to a local individual of the Ancient Greek colony of Himera, Sicily (780-400 BCE) and an IA individual from the Peloponnese (1070-800 BCE).

Finally, the two remaining Archaic Amvrakia individuals are closer to the first cluster, but more differentiated towards the upper left of the PC space and the Levant Neolithic - BA-Yamnaya-like axis. One of them, the closest to the first cluster, entirely overlaps with an Etruscan individual from Italy (800-001 BCE) and is surrounded by Greek genomes mostly from the EBA\_MBA (2900-1700 BCE), and the LBA (1700-1050 BCE). The other Archaic Amvrakia individual is placed relatively far away from the first cluster, in close proximity to

EBA\_MBA (2900-1700 BCE) Greece and a few Greek Neolithic (6400-3600 BCE) and Anatolian Neolithic (9000-5600 BCE) individuals.

When performing an additional PCA (only projecting the newly generated genomes onto modern ones) using only transversions (see plot at Zenodo: <https://doi.org/10.5281/zenodo.10848927>) and thus removing the effect of possible deamination and treatment biases, these two Archaic Amvrakia individuals are grouped within the first cluster that includes the third -UDG-treated- Archaic Amvrakia individual.

### 3.5.8 Population clustering analysis (ADMIXTURE)

We performed unsupervised ADMIXTURE v.1.3.0 [135] analysis using “Dataset 2” in order to examine the broader patterns of ancestry of our newly generated genomes in comparison to other ancient individuals. In preparation for this analysis, we used Plink v.1.9 [136] for dataset manipulations and pruned the dataset based on three different linkage disequilibrium  $r^2$  thresholds (0.40, 0.60, and 0.80) on a sliding window of 200 kbp with a step of 25 variant counts (`--indep-pairwise 200 25 0.4/0.6/0.8`), as well as three allele missingness (`--geno`) thresholds (40%, 60%, and 80%), resulting in distinct final SNP counts per dataset (**Additional Table A1**). Before LD pruning and allele missingness filtering, we removed the newly sequenced samples *Amv\_Epi\_Cl\_5*, *Amv\_Epi\_Cl\_4*, *Amv\_Epi\_HeI\_3*, and *Ten\_Pe\_Arch\_1* as they have a 1st-/2nd-degree genetic kinship with individuals that exhibit higher coverage in the dataset. We performed the analysis for  $K=2-10$ , using the `--haploid="*"` flag given that our data are pseudohaploidized and we determined the best  $K$  value and LD and allele missingness thresholds by using ADMIXTURE’s internal block jackknife routine to estimate cross validation errors (**Supplementary Figure S34**). The script is provided in <https://doi.org/10.5281/zenodo.10848927> and includes the following R packages: `argparse` v.2.2.3 [137], `doMC` v.1.3.8 [138], `foreach` v.1.5.2 [139], `ggh4x` v.0.2.8 [140], `ggthemes` v.5.0.0 [141], `gridExtra` v.2.3 [142], `reshape` [143], and `stringr` v.1.5.1 [144]. Note that for datasets filtered by linkage disequilibrium threshold 0.6 and allele missingness 80% ADMIXTURE ran into segmentation fault for  $K = 2-8$

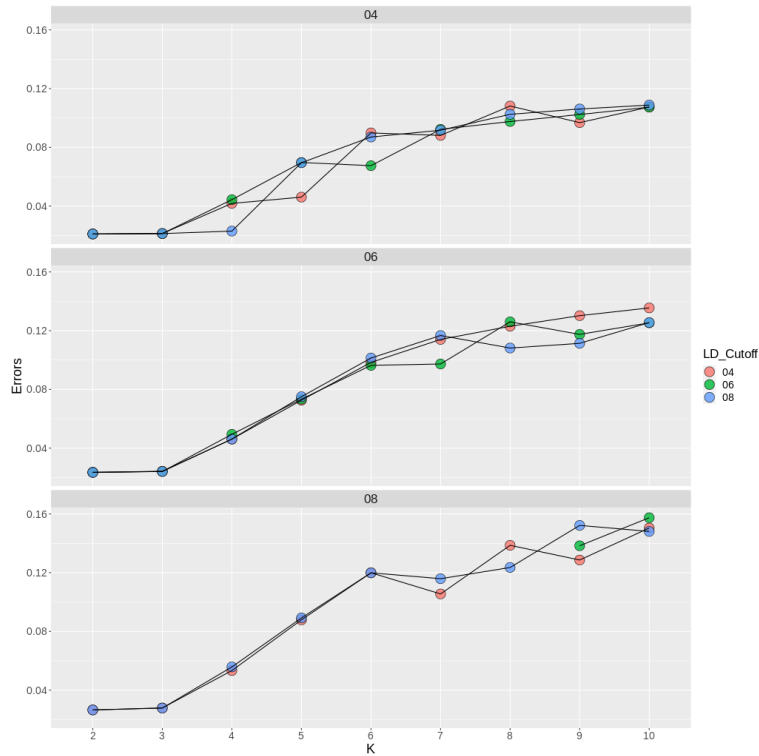

**Supplementary Figure S34.** ADMIXTURE block jackknife cross validation errors for K=2-10 and a linkage disequilibrium  $r^2$  threshold (LD\_Cutoff) of 0.40, 0.60, and 0.80, respectively. SNPs whose presence was below the respective missingness threshold, as well as SNPs exceeding the LD threshold on a sliding window of 200 kbp with a step of 25 variant counts, were removed.

**Additional Table A1.** Resulting number of SNPs after filtering the dataset used for ADMIXTURE analysis using distinct linkage disequilibrium (LD) and missingness thresholds.

| LD threshold ( $r^2$ ) | Allele missingness threshold (%) | # SNPs |
|------------------------|----------------------------------|--------|
| 0.80                   | 80                               | 750465 |
| 0.80                   | 60                               | 579477 |
| 0.80                   | 40                               | 343068 |
| 0.60                   | 80                               | 748320 |
| 0.60                   | 60                               | 579025 |
| 0.60                   | 40                               | 342986 |
| 0.40                   | 80                               | 710219 |
| 0.40                   | 60                               | 566062 |
| 0.40                   | 40                               | 339786 |

We observed similar results among the pruning/filtering options for K=2-4, albeit the allele missingness threshold of 80% was slightly worse than the 60% and 40%. For higher values, an allele missingness filter of 40% seems to marginally outperform the other two configurations regardless of the selected LD cutoff. The fewest errors were observed for K=2 and K=3. All resulting ADMIXTURE plots are provided in

<https://doi.org/10.5281/zenodo.10848927>. The resulting plots of ADMIXTURE analysis using an LD threshold of 0.80 and an allele missingness threshold of 40% are presented in **Figure 2B** (K=3; only historical individuals plotted) and in **Supplementary Figure S35 (A-I)** (K=2-10; all individuals plotted). The grouping of samples under the same population label is given in **Supplementary Table 4 (Additional file 4)**. Here, we applied an analogous grouping procedure as for the PCA analyses, with the following modifications: a) we further subdivided LBA to Roman times Greece geographically, in order to separate Crete, the Cyclades, and the Peloponnese from the mainland, b) we subdivided the Hunter Gatherers (into WHG, CHG, etc.), and c) we divided the Natufians and the pre-pottery Neolithics of the Levant. Note that this grouping does not affect the analytical results and is merely used for better visualization.

When focusing on K=3, which is the lowest K that allows to differentiate genetic clusters associated with three key European ancestral components, namely, Western hunter-gatherers (WHGs), early European farmers (EEFs), and Caucasus hunter-gatherers (CHGs), depicted with red, orange, and blue color, respectively in **Figure 2B** and **Supplementary Figure S35B**, our samples appear to comprise all three of the above ancestral components. Most of our samples (excluding the Roman Tenea ones), have ancestry proportions that resemble those of previously published LBA and IA genomes from mainland Greece: a high EEFs proportion, followed by a lower CHGs proportion, and a small WHGs proportion. The Roman Tenea genomes display a higher CHGs proportion than the rest of our samples, a reduced EEFs proportion, and an analogous WHGs proportion, thus resembling other published Roman genomes from Greece and Italy.



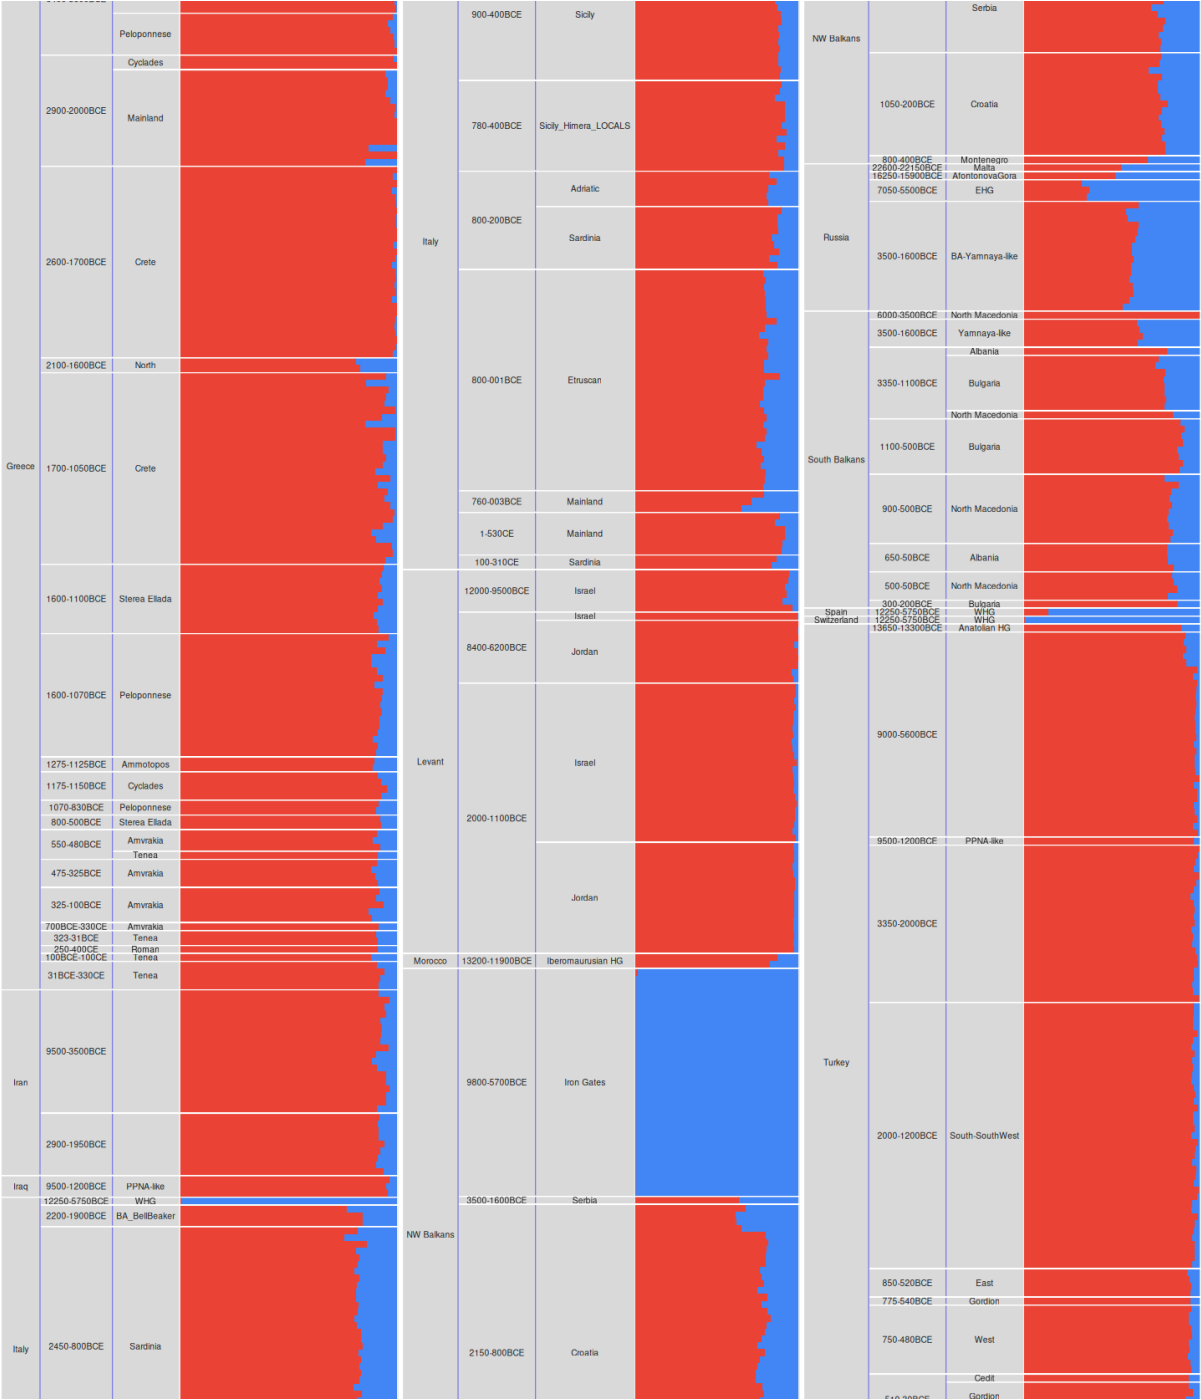

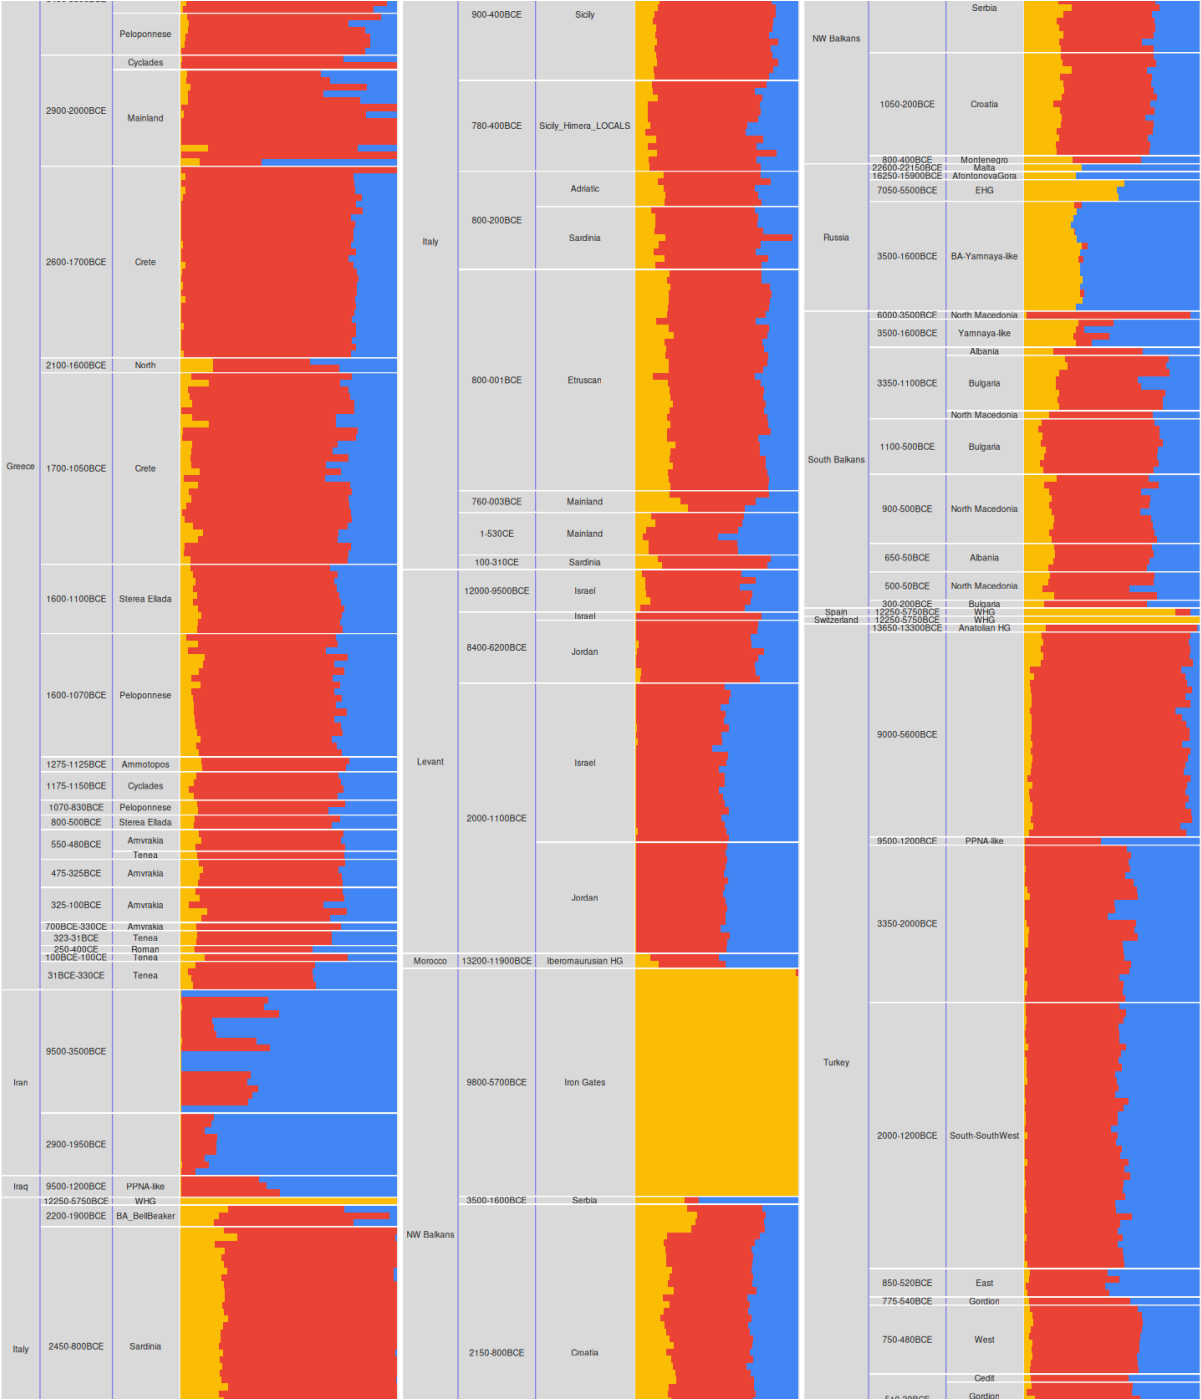

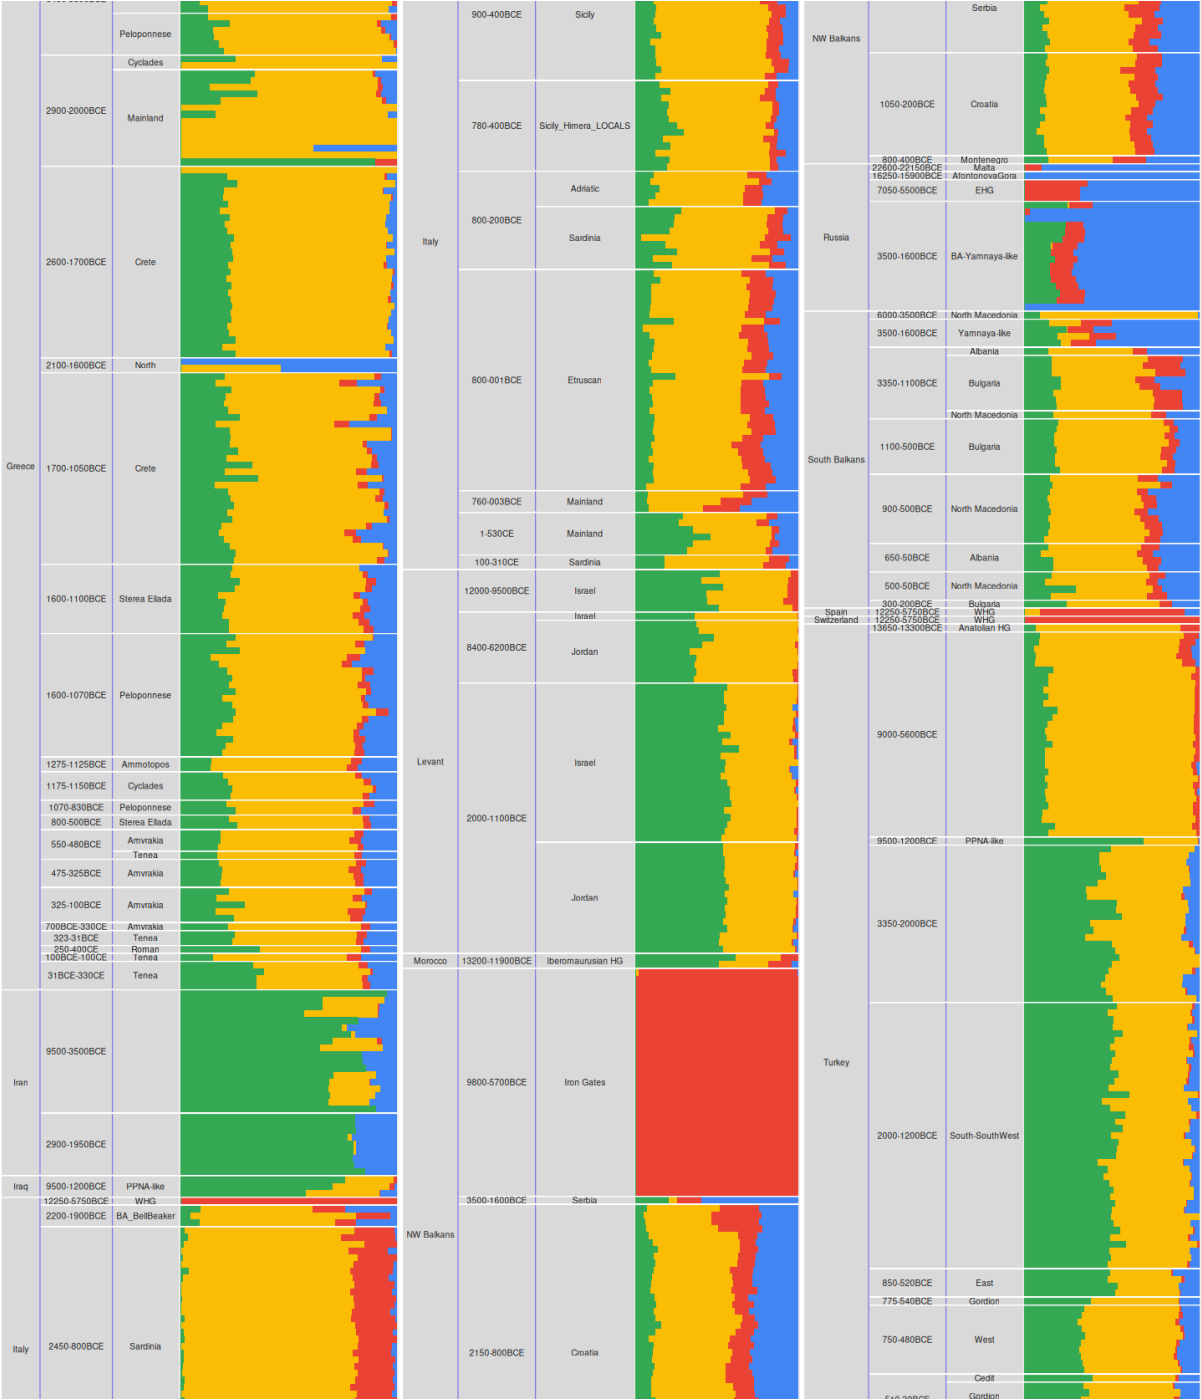

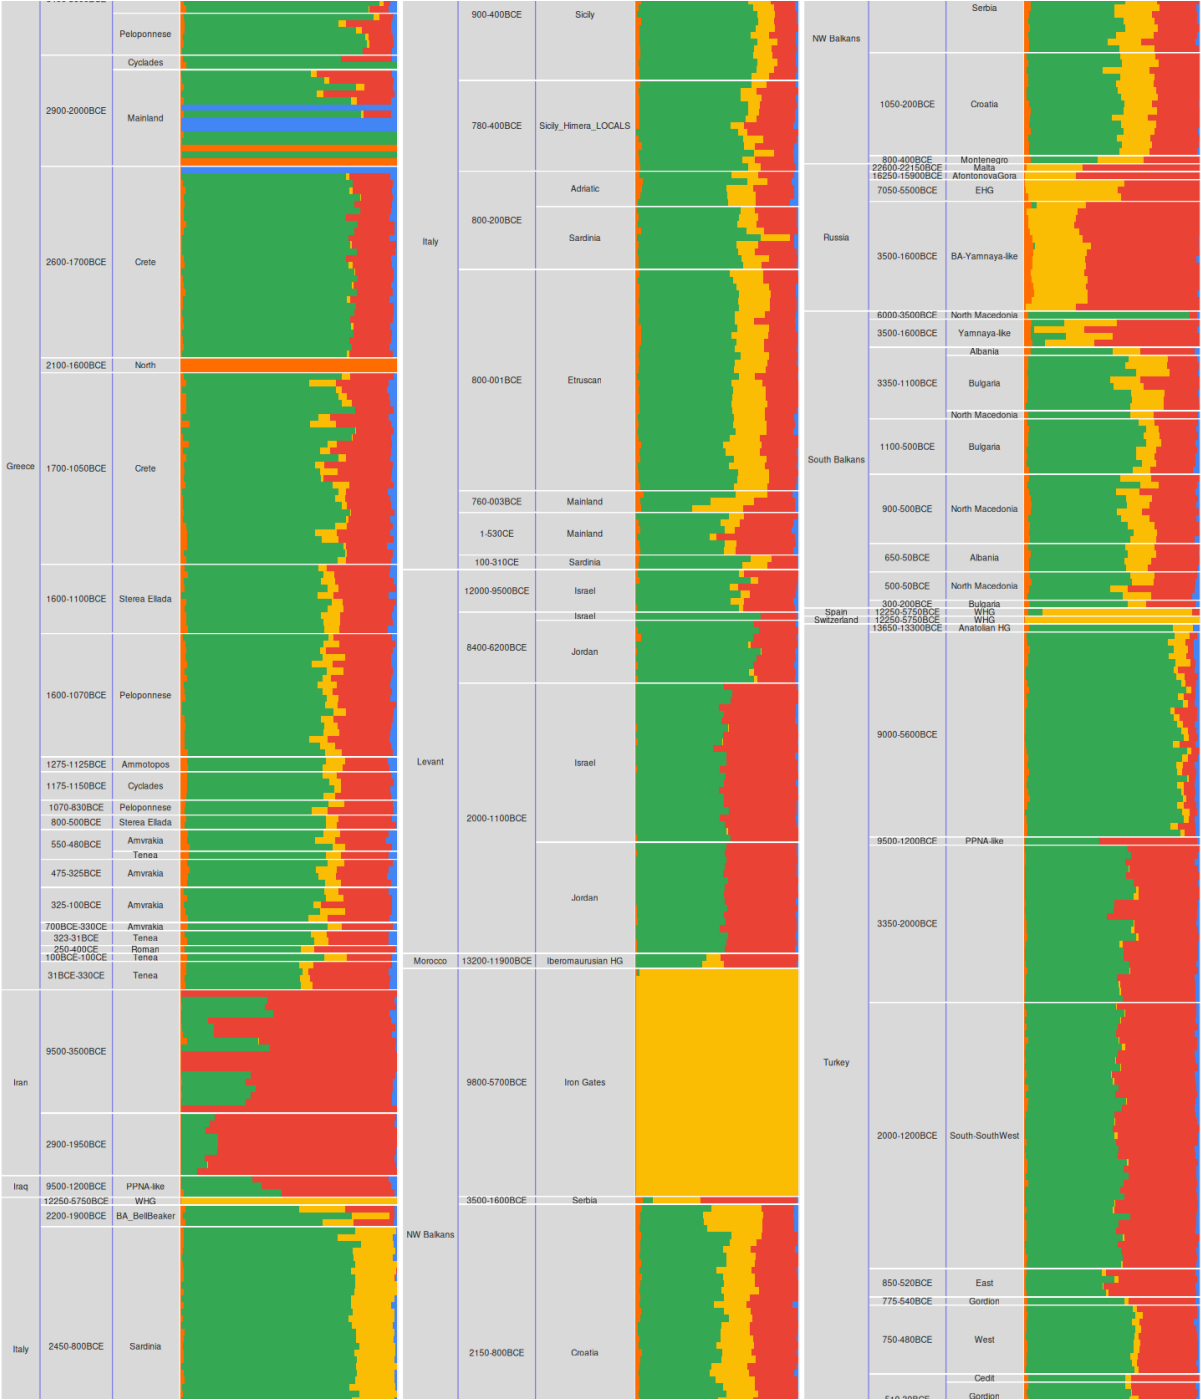

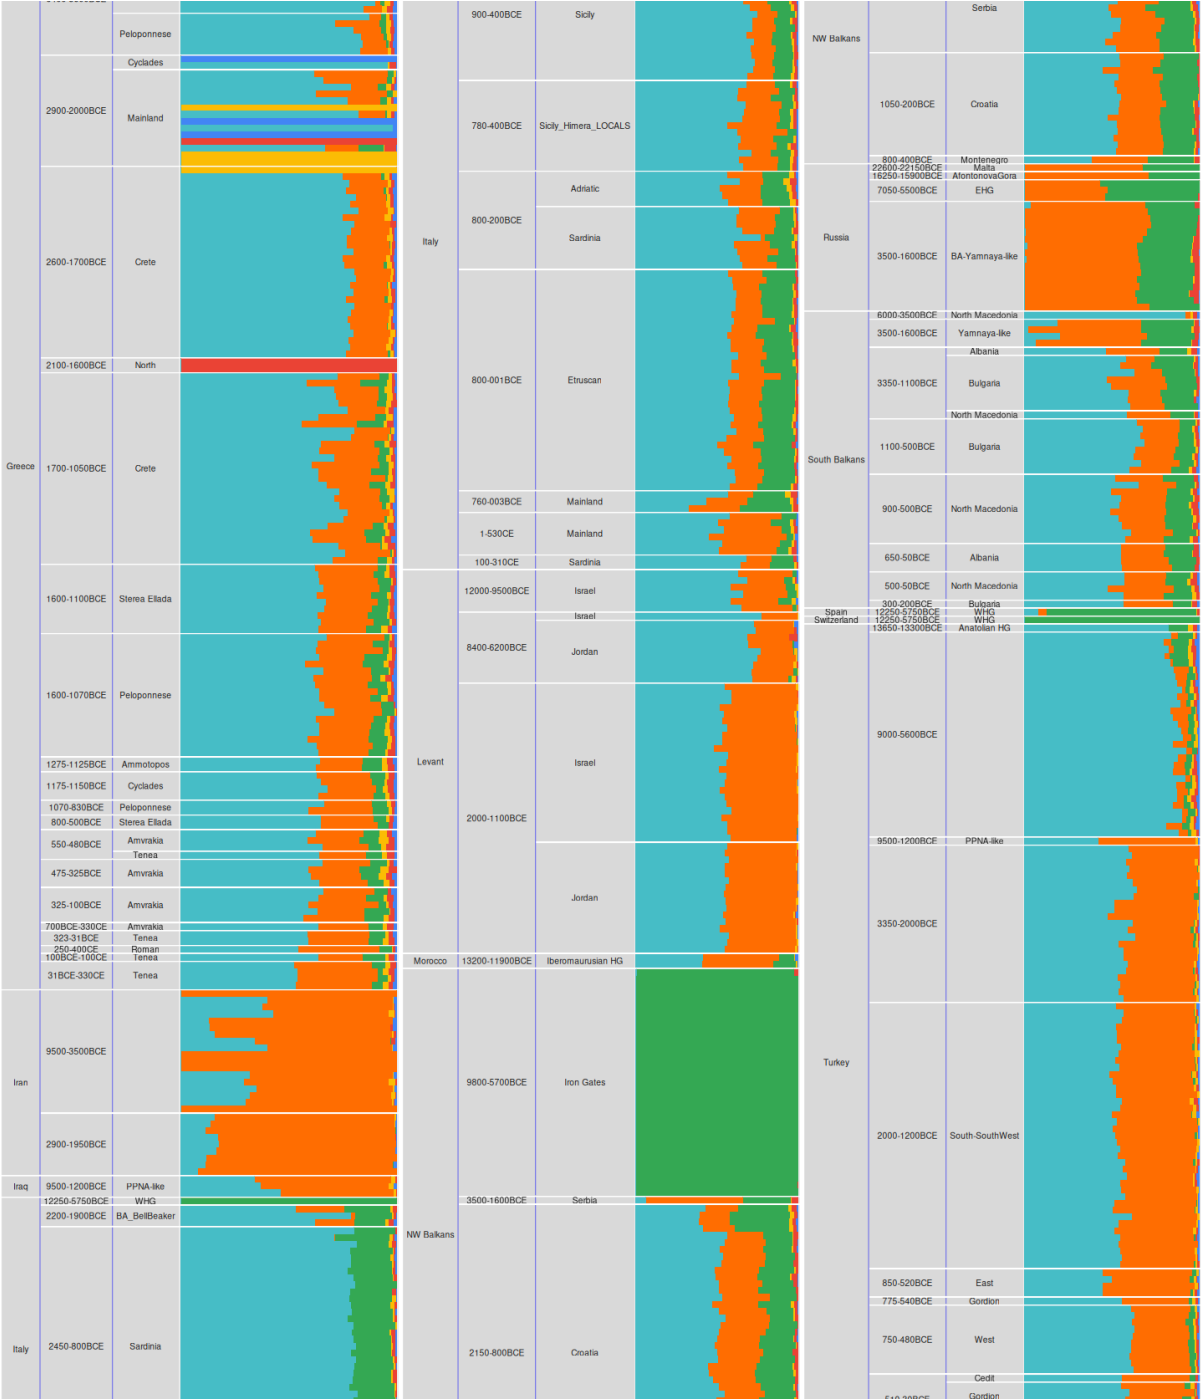



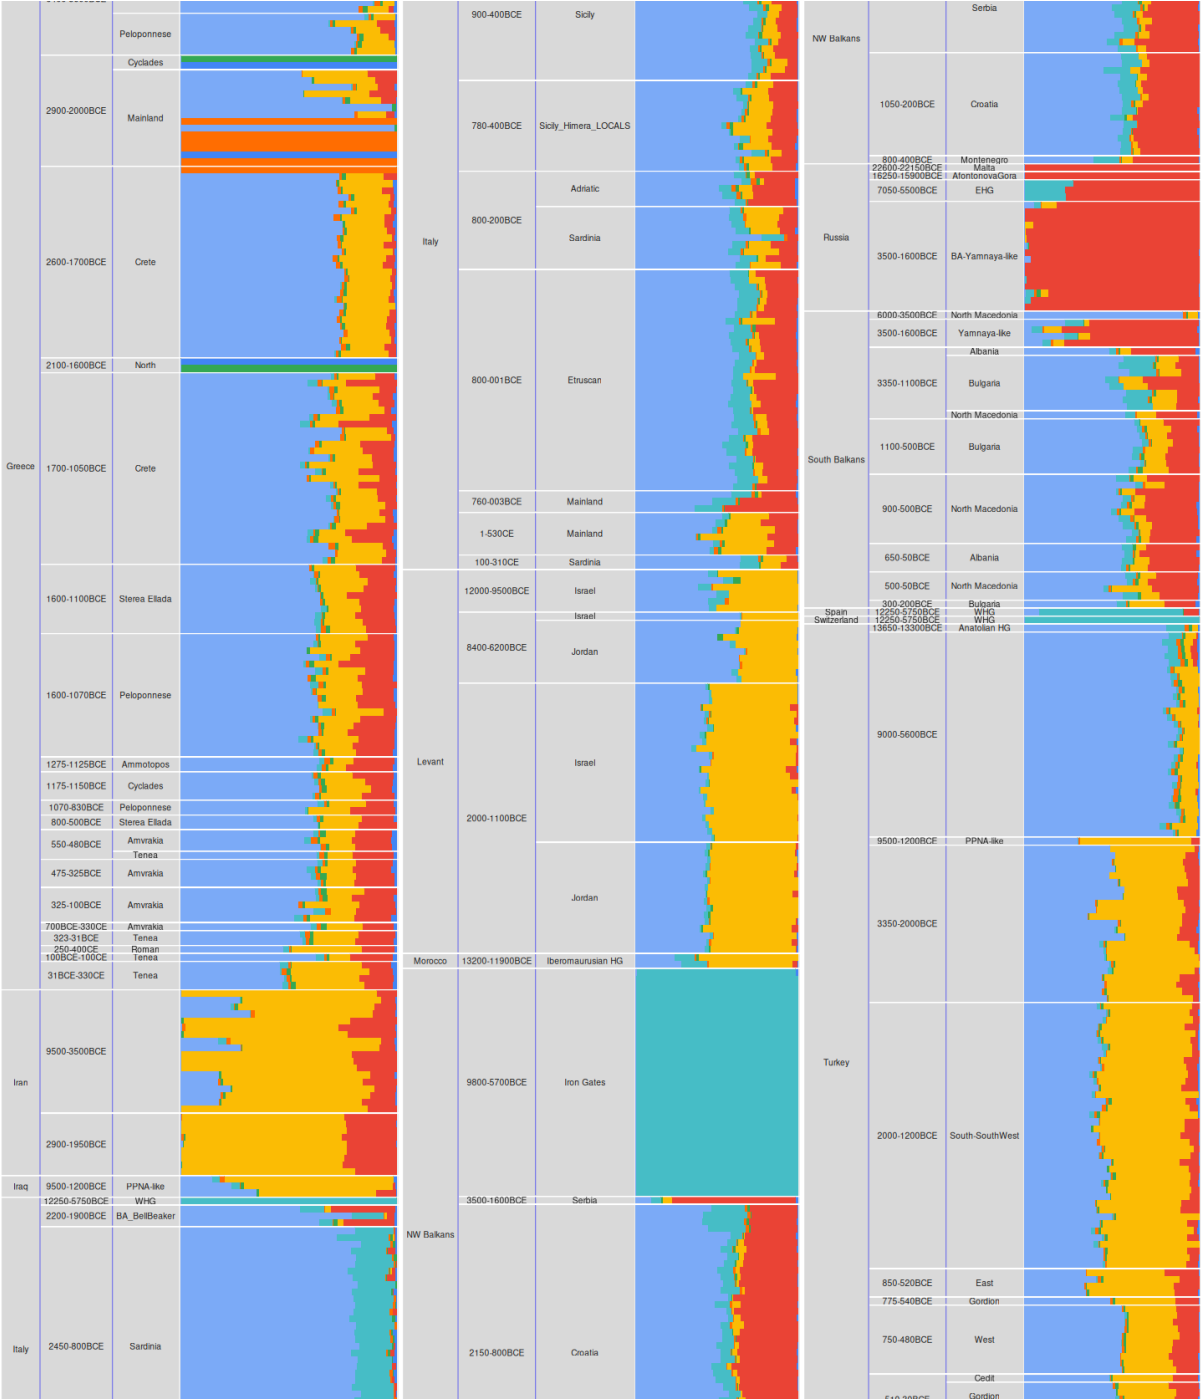

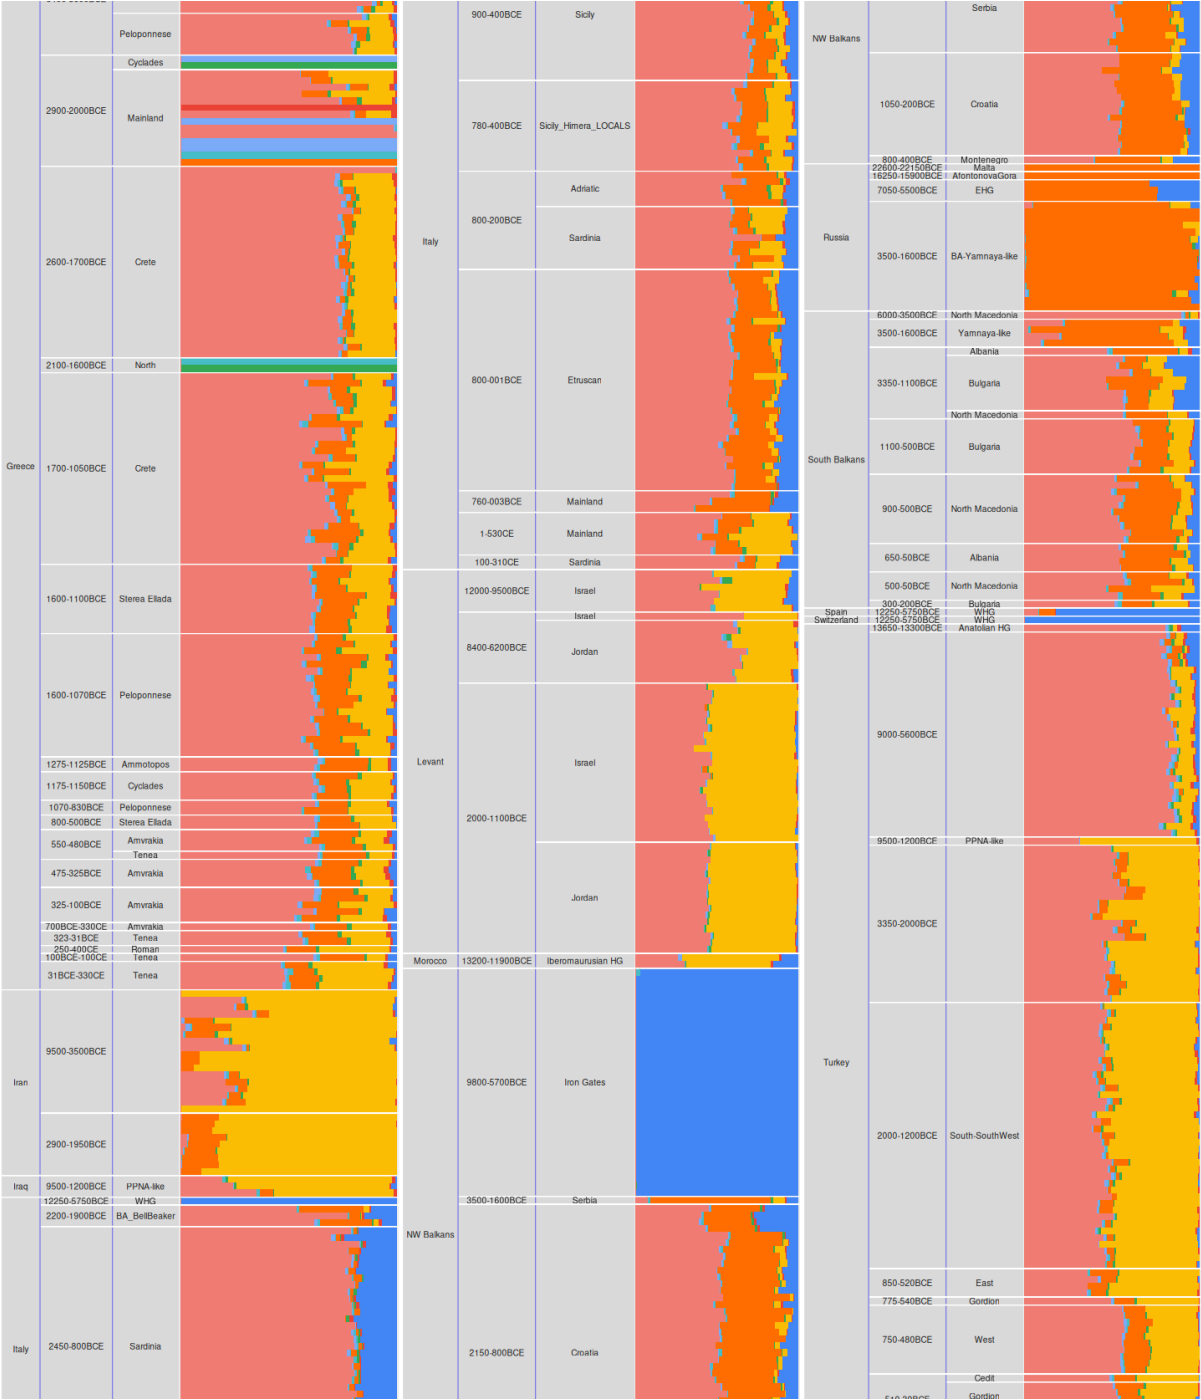

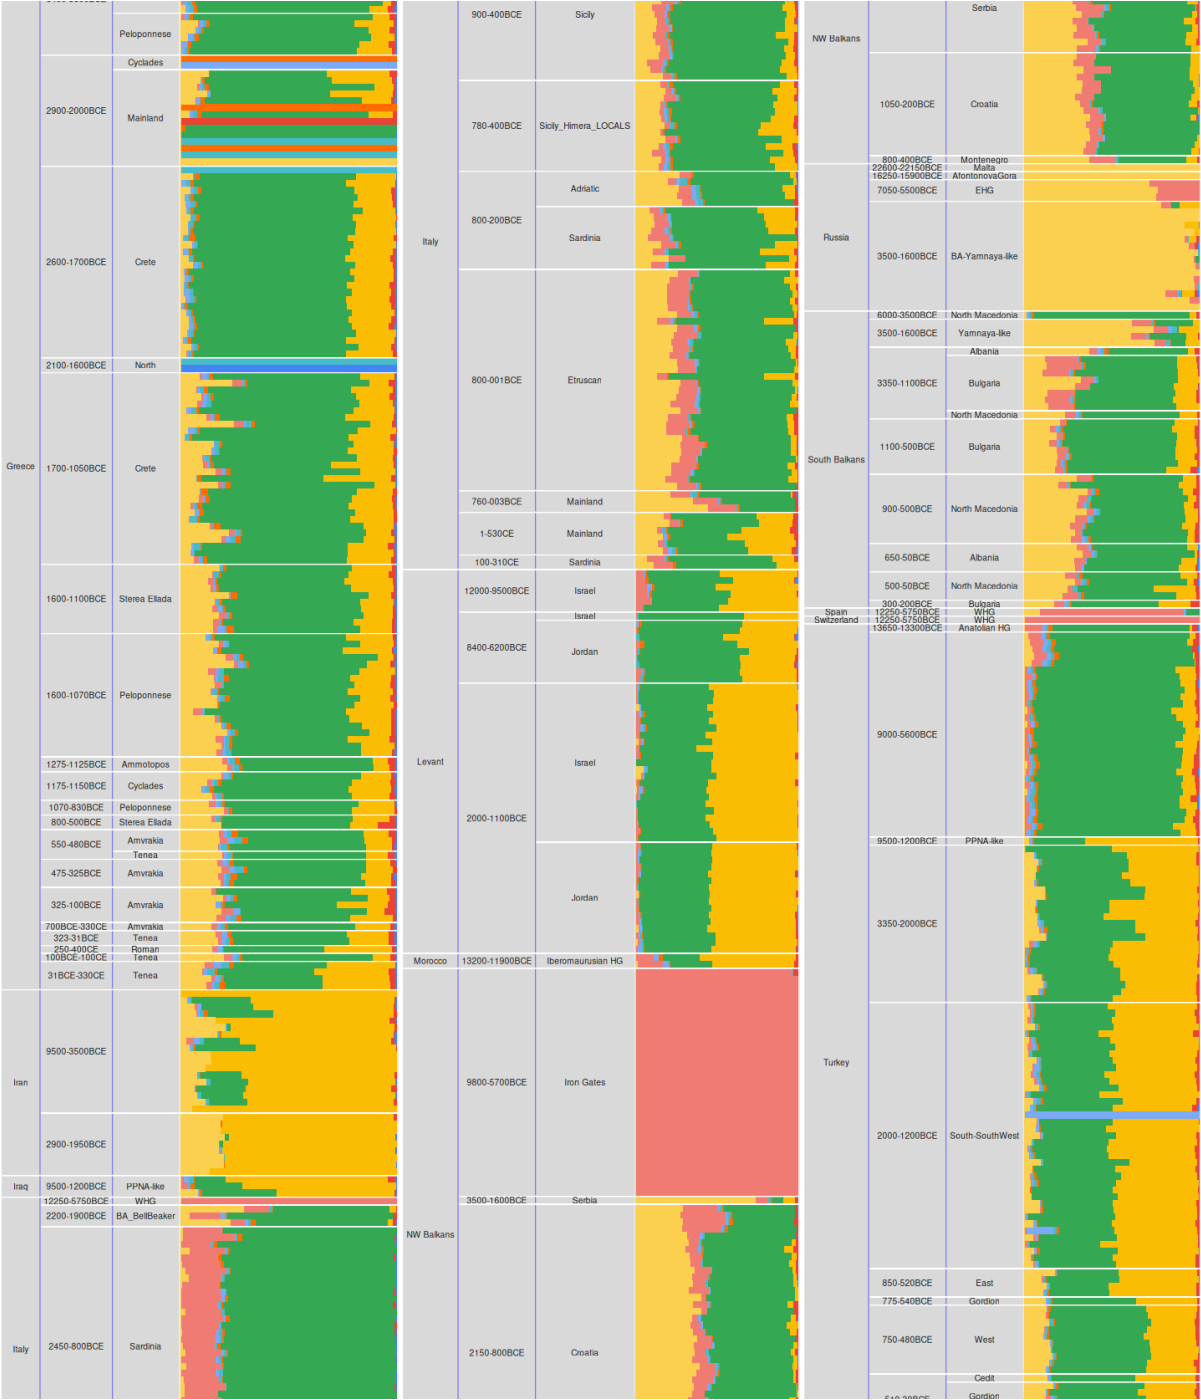

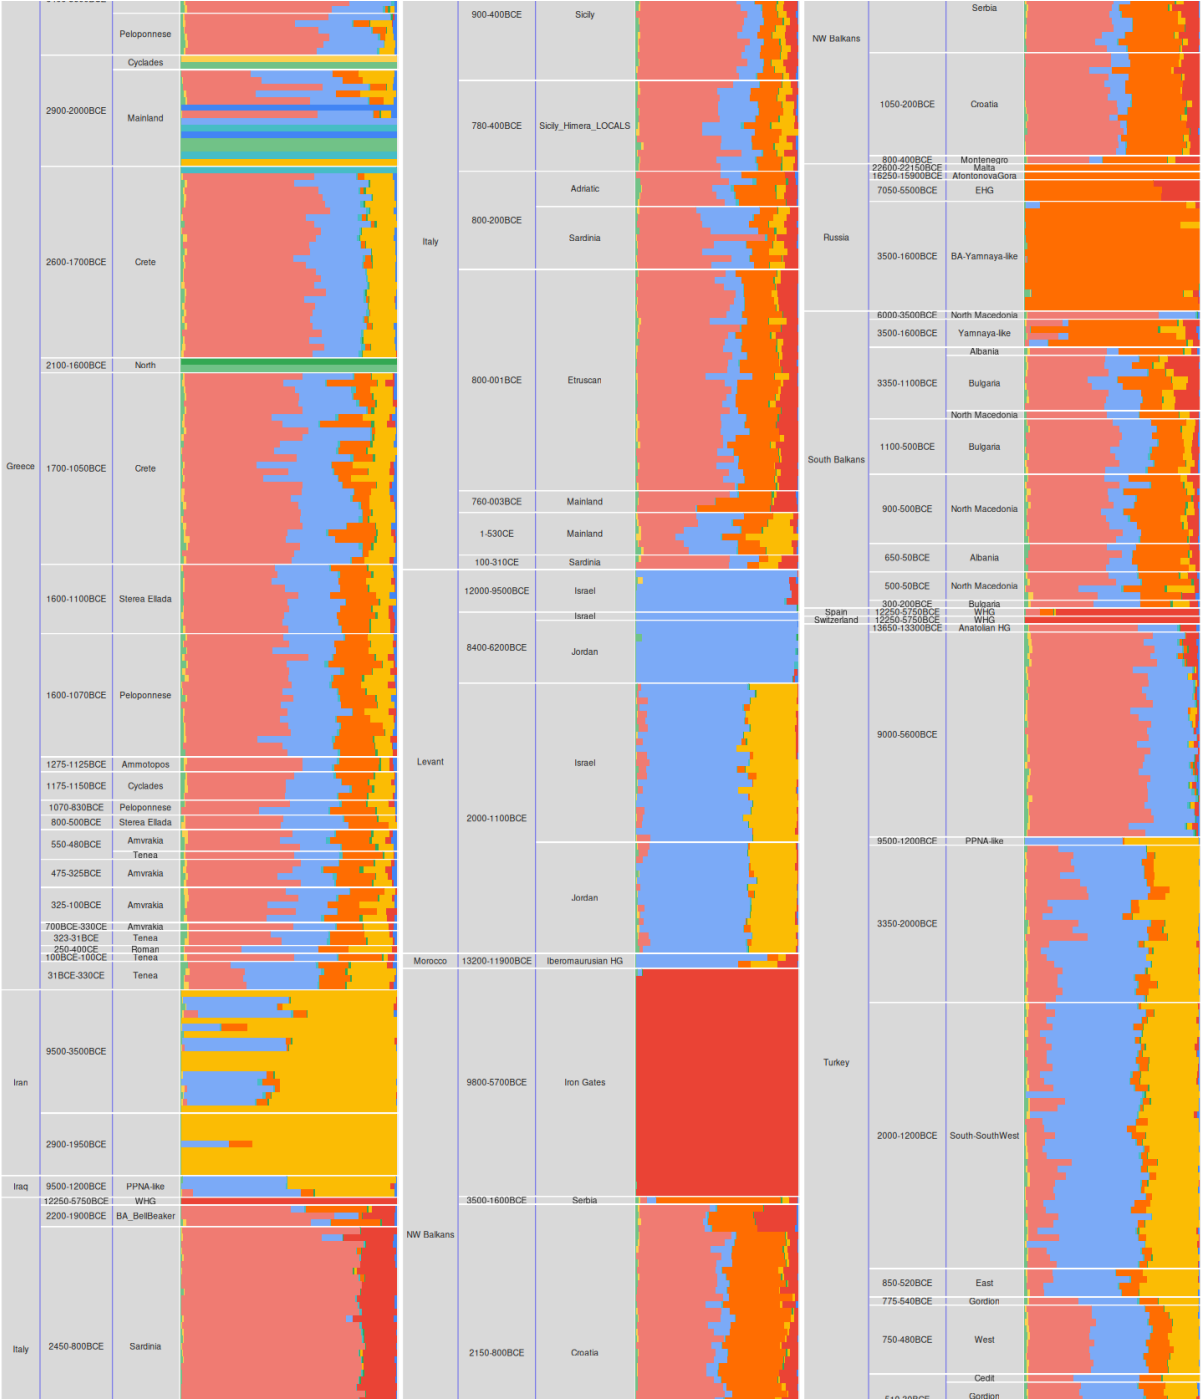

**Supplementary Figure S35.** ADMIXTURE analysis of 22 newly generated ancient genomes of the present study (four individuals were excluded due to genetic kinship) and 664 other ancient published genomes (“Dataset 1”) using K=2-10 (**A-I plots**), an LD  $r^2$  threshold of 0.80 and an allele missingness threshold of 40%. The analysis was based on 343068 genomic sites of the 1240K list. The plots are available at Zenodo (<https://doi.org/10.5281/zenodo.10848927>), too.

### 3.5.9 f3 Statistics and Ancestry Proportion Analysis (qpAdm)

#### F-statistics analyses

For the F-statistics analyses we grouped the ancient individuals (public and newly sequenced here; “**Dataset 1**”) according to their general genetic ancestry and their chronological and archaeological contexts, and performed the analysis on a per-group and per-individual basis. Here, we applied the same grouping approach as for the ADMIXTURE analyses, albeit different analyses required generating different subdatasets (**Supplementary Table 4; Additional file 4**; see also details below). Samples *Amv\_Epi\_Cl\_5*, *Amv\_Epi\_Cl\_4*, *Amv\_Epi\_Hel\_3*, and *Ten\_Pel\_Arch\_1* were removed from per-group analyses as they have a 1st-/2nd-degree genetic kinship relationship with individuals that exhibit higher coverage in the dataset. They were included, nonetheless, in the per-individual analyses.

**Ancestry modeling was performed with qpAdm using the ‘rotating population’ strategy** [145]. This approach begins by identifying a set of “candidate” populations from which we iteratively select a defined number of “sources” of ancestry for our “target” population (1-4 populations in our analyses). We performed three sets of rotating qpAdm runs by always keeping the same targets, but changing the potential sources. As separate targets we used the focal populations of Ammotopos, Amvrakia, Tenea during different time periods (LBA, Archaic, Classical, Hellenistic, Roman, etc).

For the first run we used distant genetic sources (henceforth denoted as “Ultimate” sources) that characterize the general ancestry of ancient Western Europeans following Lazaridis et al. [147]. The same sources were used for all targets in order to compare their general genetic ancestry (see **Supplementary Table 4; Additional file 4** for details):

- IRN\_HajjiFiruz\_N\_6050-5700BCE
- IRN\_SehGabi\_C\_4850-3800BCE
- IRN\_TepeHissar\_C\_BA\_3700-1950BCE
- RUS\_W\_Samara\_EBA\_Yamnaya\_3350-2500BCE
- RUS\_S\_AfontovaGora\_UP\_HG\_16250-15900BCE
- ITA-ESP-CHE\_M\_WHG\_12250-5750BCE
- RUS\_M\_EHG\_7050-5500BCE
- TUR\_NW\_Barcin\_N\_6500-5900BCE
- ISR\_RaqefetCave\_EpiP\_Natufian\_12000\_9500BCE
- ISR-JOR\_PPN\_Levant\_8400-6200BCE
- IRN\_GanjDareh\_N\_8300-7600BCE
- SRB\_M\_HG\_IronGates\_9800-5700BCE
- IRQ\_TUR\_PPNA-like\_Mesopotamia\_9500-1200BCE
- GEO\_M\_CHG\_11500-7500BCE
- MAR\_NorthEast\_Taforalt\_UP\_HG\_Iberomaurusian\_13200-11900BCE
- TUR\_SWC\_Pinarbasi\_Epipaleolithic\_HG\_13650-13300BCE
- TUR\_SC\_BoncukluHoyuk\_N\_8300-7600BCE
- RUS\_S\_Malta\_UP\_HG\_22600-22150BCE.

For the second run, we performed the analysis under the same setting, but replaced the “Ultimate” sources with spatiotemporally more proximate ones (henceforth denoted as “More\_proximate” sources; see **Supplementary Table 4; Additional file 4** for details) in order



1628 to again compare the ancestry modeling of the different targets using alternative sources that  
1629 may better represent their common ancestry:

1630 ALB\_MBA\_1900-1700BCE  
1631 BGR-SER\_EBA-to-EMBA\_Yamnaya-like\_2900-2000BCE  
1632 BGR\_EBA\_3400-1600BCE  
1633 NW\_Balkans\_EBA-to-MLBA\_2150-1250BCE  
1634 GRC\_Peloponnese\_LBA\_1600\_1280BCE  
1635 GRC\_Neolithic\_6400-3600BCE  
1636 GRC\_Crete\_LBA\_1700-1250BCE  
1637 GRC\_StereiaEllada\_LBA\_1600-1300BCE  
1638 GRC\_Crete\_EBA\_EMBA\_MBA\_2900-1700  
1639 GRC\_EBA\_2900-2000BCE  
1640 GRC\_Mainland\_North\_MBA\_2100-1600BCE  
1641 ISR-JOR\_MLBA-to-LBA\_2000-1285BCE  
1642 ITA\_Sicily\_EBA\_2300-1650BCE  
1643 ITA\_Sardinia\_MBA\_1550-1300BCE  
1644 ITA\_BA\_BellBeaker\_2500-1900BCE  
1645 TUR\_S-SW\_MBA-to-MLBA\_2000-1300BCE  
1646 IRN\_TepeHissar\_C\_BA\_3700-1950BCE  
1647 RUS\_W\_Samara\_EBA\_Yamnaya\_3350-2500BCE.

1648 For the third run, the goal was to identify the immediate sources of each target.  
1649 Therefore, in this run, each target had a different set of potential sources that was,  
1650 spatiotemporally, as close to the target as possible: the temporal range was limited to those  
1651 individuals that dated earlier than the target, whereas the spatial range was constrained to the  
1652 Eastern Mediterranean and adjacent areas, including Italy, the Balkans and the Middle East  
1653 ("Most\_proximate" sources, hereinafter; see **Supplementary Table 4; Additional file 4** for  
1654 details):

1655 Ammotopos

1656 ALB\_MBA\_1900-1700BCE  
1657 BGR\_EMBA\_Yamnaya-like\_1850-1600BCE  
1658 GRC\_Crete\_LBA\_1700-1250BCE  
1659 GRC\_Mainland\_North\_MBA\_2100-1600BCE  
1660 GRC\_Peloponnese\_LBA\_1600\_1280BCE  
1661 GRC\_StereiaEllada\_LBA\_1600-1300BCE  
1662 HRV-MNE\_MBA-to-MLBA\_1750-1280BCE  
1663 ISR-JOR\_MLBA-to-LBA\_2000-1285BCE  
1664 ITA\_BA\_BellBeaker\_2500-1900BCE  
1665 ITA\_Sardinia\_MBA\_1550-1300BCE  
1666 TUR\_S-SW\_MBA-to-MLBA\_2000-1300BCE

1667 Archaic Amvrakia and Archaic Tenea

1668 ALB\_MBA\_1900-1700BCE  
1669 BGR\_EIA\_1100-500BCE  
1670 GRC\_Ammotopos\_LBA\_1275-1125BCE  
1671 GRC\_Crete\_LBA\_1350-1050BCE  
1672 GRC\_Cyclades\_LBA\_1175-1150BCE  
1673 GRC\_Peloponnese\_IA\_1070-830BCE  
1674 GRC\_StereiaEllada\_LBA\_1400-1100BCE  
1675 GRC\_Tenea\_Archaic\_550-480BCE

1676 HRV\_EIA\_1050-550BCE  
 1677 ISR-JOR\_MLBA-to-LBA\_1400-1100BCE  
 1678 ITA\_Mainland\_IA\_and\_Etruscan\_800-540BCE  
 1679 ITA\_Sardinia\_IA\_800-550BCE  
 1680 ITA\_Sicily\_IA\_900-700BCE  
 1681 MKD\_IA\_900-550BCE  
 1682 SRB\_LBA\_1000\_900BCE  
 1683 TUR\_IA\_850-750BCE  
 1684 EGY\_IA\_800-550BCE  
 1685 Classical Amvrakia  
 1686 ALB\_MBA\_1900-1700BCE  
 1687 BGR\_EIA\_1100-500BCE  
 1688 GRC\_Ammotopos\_LBA\_1275-1125BCE  
 1689 GRC\_Amvrakia\_Archaic\_550-480BCE  
 1690 GRC\_Crete\_LBA\_1350-1050BCE  
 1691 GRC\_Cyclades\_LBA\_1175-1150BCE  
 1692 GRC\_Peloponnese\_IA\_1070-830BCE  
 1693 GRC\_StereiaEllada\_IA\_800-500BCE  
 1694 GRC\_Tenea\_Archaic\_550-480BCE  
 1695 HRV\_EIA\_1050-550BCE  
 1696 ISR-JOR\_MLBA-to-LBA\_1400-1100BCE  
 1697 ITA\_Mainland\_IA\_and\_Etruscan\_800-520BCE  
 1698 ITA\_Sardinia\_IA\_800-550BCE  
 1699 ITA\_Sicily\_IA\_900-700BCE  
 1700 MKD\_IA\_800-500BCE  
 1701 SRB\_LBA\_1000\_900BCE  
 1702 TUR\_Archaic\_780-480BCE  
 1703 EGY\_IA\_800-550BCE  
 1704 ITA\_Adriatic\_IA\_750-400BCE  
 1705 Hellenistic Amvrakia and HellenisticTenea  
 1706 ALB\_IA\_650-400BCE  
 1707 BGR\_EIA\_1100-500BCE  
 1708 GRC\_Ammotopos\_LBA\_1275-1125BCE  
 1709 GRC\_Amvrakia\_Archaic\_550-480BCE  
 1710 GRC\_Amvrakia\_Classical\_475-325BCE  
 1711 GRC\_Crete\_LBA\_1350-1050BCE  
 1712 GRC\_Cyclades\_LBA\_1175-1150BCE  
 1713 GRC\_Peloponnese\_IA\_1070-830BCE  
 1714 GRC\_StereiaEllada\_IA\_800-500BCE  
 1715 GRC\_Tenea\_Archaic\_550-480BCE  
 1716 GRC\_Tenea\_Hellenistic\_150-100BCE  
 1717 HRV-MNE\_EIA\_800-400BCE  
 1718 ISR-JOR\_MLBA-to-LBA\_1400-1100BCE  
 1719 ITA\_Mainland\_IA\_and\_Etruscan\_800-400BCE  
 1720 ITA\_Sardinia\_IA\_800-400BCE  
 1721 ITA\_Sicily\_Himera\_Archaic\_Classical\_LOCAL\_780-400BCE  
 1722 ITA\_Sicily\_IA\_900-400BCE  
 1723 MKD\_Classical\_400-380BCE

1724 SRB\_LBA\_1000\_900BCE  
 1725 TUR\_Archaic-to-Hellenistic\_780-390BCE  
 1726 EGY\_IA\_800-550BCE  
 1727 ITA\_Adriatic\_IA\_750-400BCE  
 1728 Roman Tenea  
 1729 ALB\_IA\_650-50BCE  
 1730 BGR\_IA\_1100-200BCE  
 1731 GRC\_Ammotopos\_LBA\_1275-1125BCE  
 1732 GRC\_Amvrakia\_Archaic\_550-480BCE  
 1733 GRC\_Amvrakia\_Classical\_475-325BCE  
 1734 GRC\_Amvrakia\_Hellenistic\_325-100BCE  
 1735 GRC\_Crete\_LBA\_1350-1050BCE  
 1736 GRC\_Cyclades\_LBA\_1175-1150BCE  
 1737 GRC\_StereiaEllada\_IA\_800-500BCE  
 1738 GRC\_Peloponnese\_IA\_1070-830BCE  
 1739 GRC\_Tenea\_Archaic\_550-480BCE  
 1740 GRC\_Tenea\_Hellenistic\_150-100BCE  
 1741 HRV-MNE\_EIA\_800-200BCE  
 1742 ISR-JOR\_MLBA-to-LBA\_1400-1100BCE  
 1743 ITA\_C\_IA\_Etruscan\_RomanRepublic\_450-50BCE  
 1744 ITA\_Sardinia\_IA\_800-200BCE  
 1745 ITA\_Sicily\_Himera\_Archaic\_Classical\_LOCAL\_780-400BCE  
 1746 ITA\_Sicily\_IA\_900-400BCE  
 1747 MKD\_Classical\_Hellenistic\_500-100BCE  
 1748 SRB\_LBA\_1000\_900BCE  
 1749 TUR\_Hellenistic\_510-30BCE  
 1750 ITA\_Adriatic\_IA\_750-200BCE  
 1751 EGY\_IA\_800-550BCE

1752  
 1753 We performed pairwise qpWave analysis on each group of sources in order to  
 1754 determine populations suitable to be placed as “right” in qpAdm (referred to as **base** from  
 1755 hereon). We developed an iterative approach where the population that had the highest  
 1756 number of cladal relationships compared to all APOIKIA populations, was being removed from  
 1757 **base**. The process stops when no pairs of populations form a clade. *In case of a tie, the*  
 1758 *youngest population was removed*. The populations that were removed by this process were  
 1759 included only as “left” (referred to as **sources** from hereon). qpWave was run with parameters  
 1760 *maxmiss = 0.2*, *afprod = TRUE* and *adjust\_pseudohaploid = TRUE*. qpWave results are  
 1761 available at <https://doi.org/10.5281/zenodo.10848927>. Populations from **base** were also  
 1762 included as potential sources and in those cases they were removed from “right” temporarily.  
 1763 For a detailed view of all population groups please see the corresponding table provided at  
 1764 **Supplementary Table 4; Additional file 4**). We then tested all possible models up to 4-way  
 1765 admixture using the R interface of ADMIXTOOLS2 v.2.0.0 [146] with parameters *allsnps =*  
 1766 *TRUE* and *adjust\_pseudohaploid = TRUE*. All analyses included the Yoruba population as the  
 1767 first “right” (outgroup) in qpAdm. In “More\_proximate” and “Most\_proximate” groups,  
 1768 populations “IRN\_GanjDareh\_N\_8300-7600BCE” and “SRB\_M\_HG\_IronGates\_9800-  
 1769 5700BCE” were included as additional “right” (outgroup) in order to satisfy qpAdm’s  
 1770 prerequisite that “right” populations should be more than the “left”. Additionally, results were  
 1771 filtered for a) *pvalue*>0.05, b) *pvalue\_nested*<0.05 (a high *pvalue\_nested* indicates that a

model with fewer sources fits the data better than the current model) and c) all admixture weights being positive. The script is provided at <https://doi.org/10.5281/zenodo.10848927>.

Feasible models (accepted models) with a p-value > 0.05 and positive z-scores (or equivalently all weights being positive) were visualized using horizontal stacked bar charts. The points in this [Horizontal stacked bar chart](#) represent the populations involved, and the color gradient indicates their admixture proportions. The models were sorted based on the number of involved sources (1-4). All the qpAdm [horizontal stacked bar charts](#) are provided at <https://doi.org/10.5281/zenodo.10848927>, along with all the rotating qpAdm analysis outputs (tables).

The results for our newly sequenced genomes using the “Most\_proximate” to each target set of sources (**Supplementary Figures S38**), as well as the targeted to Archaic Amvrakia run (**Figure 4**), are presented and discussed in the main text. For the “Ultimate” and the “More\_proximate” set of sources the results (**Supplementary Figures S36-S37**) are presented in the following:

- Ammotopos inferred to be in rotating qpAdm using:
  - a) the “Ultimate” set of sources: either a three-way admixture among an Anatolian Epipaleolithic/Neolithic source that contributes the most (~52-83%) and other secondary sources, including Neolithic Iran/CHG (~14-40%), and BalkanHG/WHG (~1-9%) or a four-way admixture that also includes additional minor sources (**Supplementary Figure S36A**),
  - b) the “More\_proximate” set of sources: a two-way admixture between a southern Balkan MBA source [MBA mainland Greece (2100-1600 BCE; ~46-59%) or MBA Albania (1900-1700 BCE; ~39%)] and either Neolithic Greece (6400-3600 BCE; ~41%) or EBA Greece (2900-2000 BCE; ~54-61%) or Early-to-Middle BA Crete (2900-1700; 43%). In three-way and four-way admixture models, sources with lower contribution are included (**Supplementary Figure S37A**).
- Archaic Amvrakia inferred to be in rotating qpAdm using:
  - a) the “Ultimate” set of sources: either a three-way admixture among an Anatolian Epipaleolithic/Neolithic source as a major contributor (~54-74%), Neolithic Iran as a secondary source (~24-41%), and BalkanHG/WHG as a minor source (~3-6%) or a four-way admixture that also includes additional minor sources (**Supplementary Figure S36B**).
  - b) the “More\_proximate” set of sources: either a two-way admixture between EBA Greece (2900-2000 BCE; ~65%) and MBA mainland Greece (2100-1600 BCE; ~35%) or a three-way admixture among the above two major sources (~38% and 50%, respectively), and Neolithic Greece (6400-3600 BCE; ~12%) as a third minor source (**Supplementary Figure S37B**). Alternatively, a four-way admixture is modelling this target as ~48% MBA mainland Greece (2100-1600 BCE), ~27.5% Early-to-Middle BA Crete (2900-1700), ~21% Neolithic Greece (6400-3600 BCE), and ~3.5% Chalcolithic Iran (3700-1950 BCE).
- Classical Amvrakia inferred to be in rotating qpAdm using:
  - a) the “Ultimate” set of sources: either a three-way admixture among an Anatolian Epipaleolithic/Neolithic source as a major contributor (~55-81%), Neolithic Iran/CHG (~9-31%) or Chalcolithic Iran (~20%) or PPNA-like\_Mesopotamia (~26%) as a secondary source, and BalkanHG/RussianUpperPaleolithicHG as a third source (~1-20%) or a four-

- way admixture that also includes additional minor sources (**Supplementary Figure S36C**),
- b) the “More\_proximate” set of sources: a two-way admixture between EBA Greece (2900-2000 BCE) as the main source (~64-88%) and either MBA mainland Greece (2100-1600 BCE; 37%) or Yamnaya-like BA Balkan/Russia (~12-15%), or MBA Albania (1900-1700 BCE; ~35%) as the second source: in the three-way admixture model, additionally to the above, sources with lower contribution are included (**Supplementary Figure S37C**).
  - Hellenistic Amvrakia inferred to be in rotating qpAdm using:
    - a) the “Ultimate” set of sources: either a three-way admixture among an Anatolian Epipaleolithic/Neolithic major source (~52-79%), Neolithic Iran/CHG (~10-40%) or Chalcolithic Iran (~19%) or PPNA-like\_Mesopotamia (~26-28%) as a secondary source , and BalkanHG/WHG/RussianUpperPaleolithicHG (~0.5-25%) as a third source or a four-way admixture that also includes additional minor sources (**Supplementary Figure S36D**),
    - b) the “More\_proximate” set of sources: a two-way admixture of almost equal contribution between pairs of the following: either Neolithic Greece (6400-3600 BCE), or EBA Greece (2900-2000 BCE), or Early-to-Middle BA Crete (2900-1700) as one of the mates and either MBA Albania (2100-1600 BCE) or MBA mainland Greece (2100-1600 BCE) as the other mate; in three-way and four-way admixture models, several other sources with lower contribution appear. (**Supplementary Figure S37D**).
  - Archaic Tenea inferred to be in rotating qpAdm using:
    - a) the “Ultimate” set of sources: either a three--way admixture among an Anatolian Epipaleolithic/Neolithic major source (~45-77%), Neolithic Iran/CHG (~8-41%) or Chalcolithic Iran (~9-25%) or PPNA-like\_Mesopotamia (~12-33%) as a secondary source , and BalkanHG/WHG/RussianUpperPaleolithicHG (~5-28%) as a third source or a four-way admixture that also includes additional minor sources (**Supplementary Figure S36E**),
    - b) the “More\_proximate” set of sources: either a two-way admixture between EBA Greece (2900-2000 BCE) as main source (~64-88%) and either MBA mainland Greece (2100-1600 BCE) or MBA Albania (1900-1700 BCE) or EBA-to-MLBA Balkans or Yamnaya-like Balkans/Russia as a second source (~12-36%) or a two-way admixture of almost equal contribution between MBA mainland Greece (2100-1600 BCE) and either Neolithic Greece (6400-3600 BCE) or Early-to-Middle BA Crete (2900-1700); in three-way and four-way admixture models, sources with lower contribution are included (**Supplementary Figure S37E**).
  - Hellenistic Tenea is inferred to be in rotating qpAdm using:
    - a) the “Ultimate” set of sources: either a two-way admixture between Anatolian Epipaleolithic as a major source (~68%) and CHG (~32%) as a second source, or a three-way admixture among an Anatolian Epipaleolithic/Neolithic major source (~49-70%), Neolithic Iran/CHG as a secondary source (~29-43%), and BalkanHG/WHG/RussianUpperPaleolithicHG (~0.1-22%) or IberomaurusianHG (~2%) as a third source or a four-way admixture that also includes additional minor sources (**Supplementary Figure S36F**),
    - b) the “More\_proximate” set of sources: either a two-way admixture between EBA Greece (2900-2000 BCE) as main source (~79-81%) and a Yamnaya-like



1867 population as the minor source (~19-21%) or a two-way admixture of almost  
 1868 equal contribution between MBA Albania (1900-1700 BCE) and either Early-to-  
 1869 Middle BA Crete (2900-1700) or EBA Greece (2900-2000 BCE); in three-way  
 1870 and four-way admixture models, several other sources with lower contribution  
 1871 appear, such as LBA Crete, LBA Peloponnese, BA Levant, BA Türkiye etc  
 1872 **(Supplementary Figure S37F).**  
 1873 • Roman Teneia is inferred to be in rotating qpAdm using:  
 1874 ○ a) the “Ultimate” set of sources: either a three-way admixture among two major  
 1875 sources (~30-54% each), Anatolian Epipaleolithic/Neolithic and CHG , and  
 1876 Natufian/PPN Levant (~19-35%) or IberomaurusianHG (~4-5%) as a third  
 1877 source or a four-way admixture that also includes additional minor sources  
 1878 **(Supplementary Figure S36G),**  
 1879 ○ b) the “More\_proximate” set of sources: no feasible model with a >0.05 (or  
 1880 >0.01) p-value was supported.  
 1881  
 1882

1883 A.

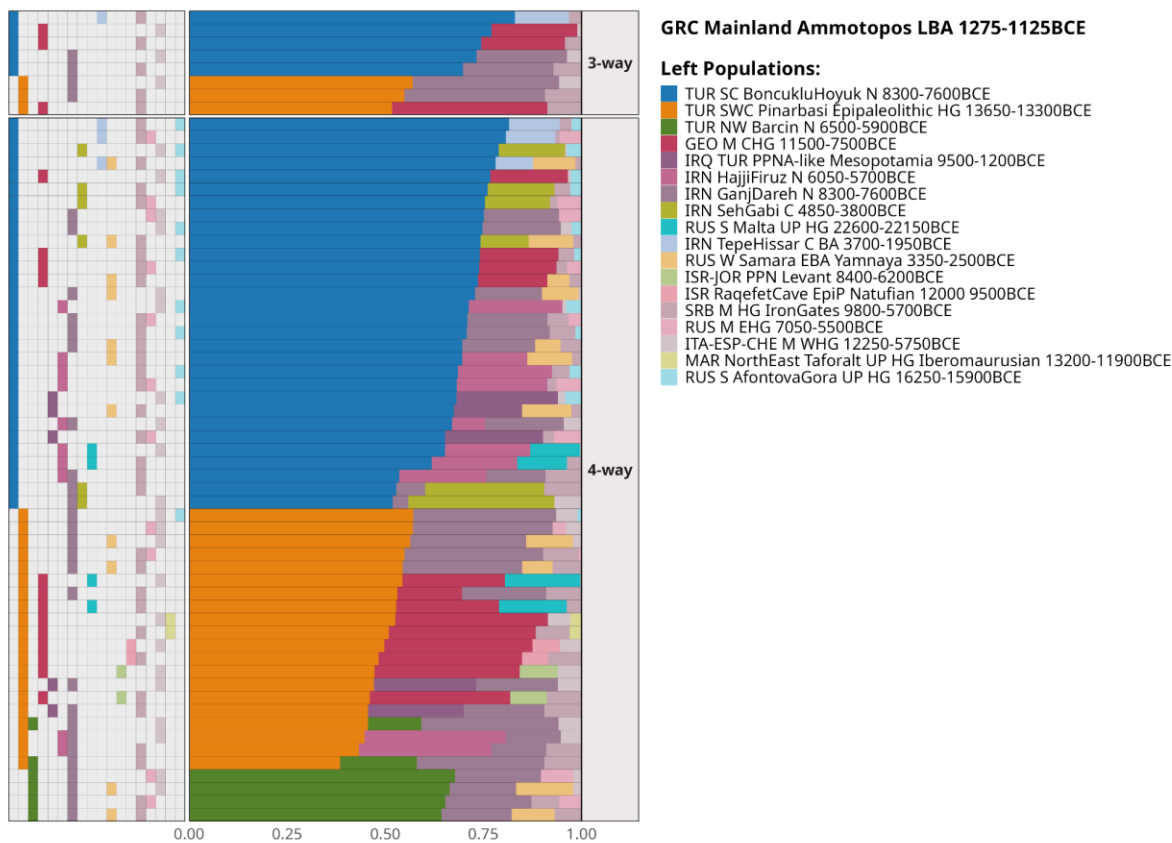

1884  
1885 B.

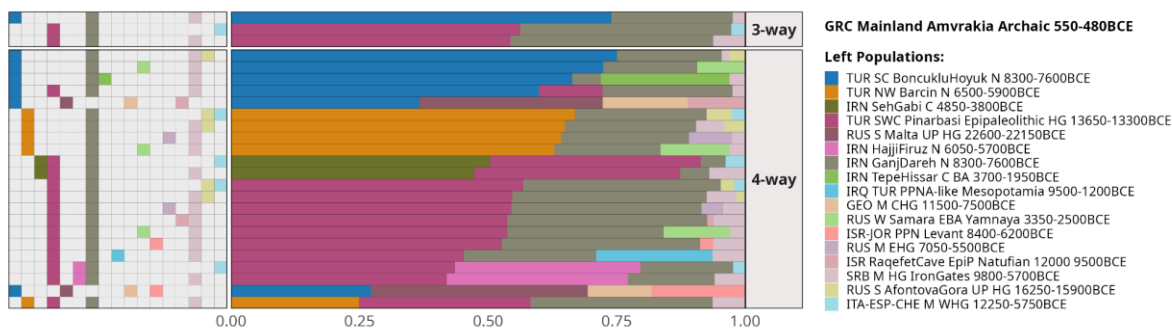

1886

1887 C.

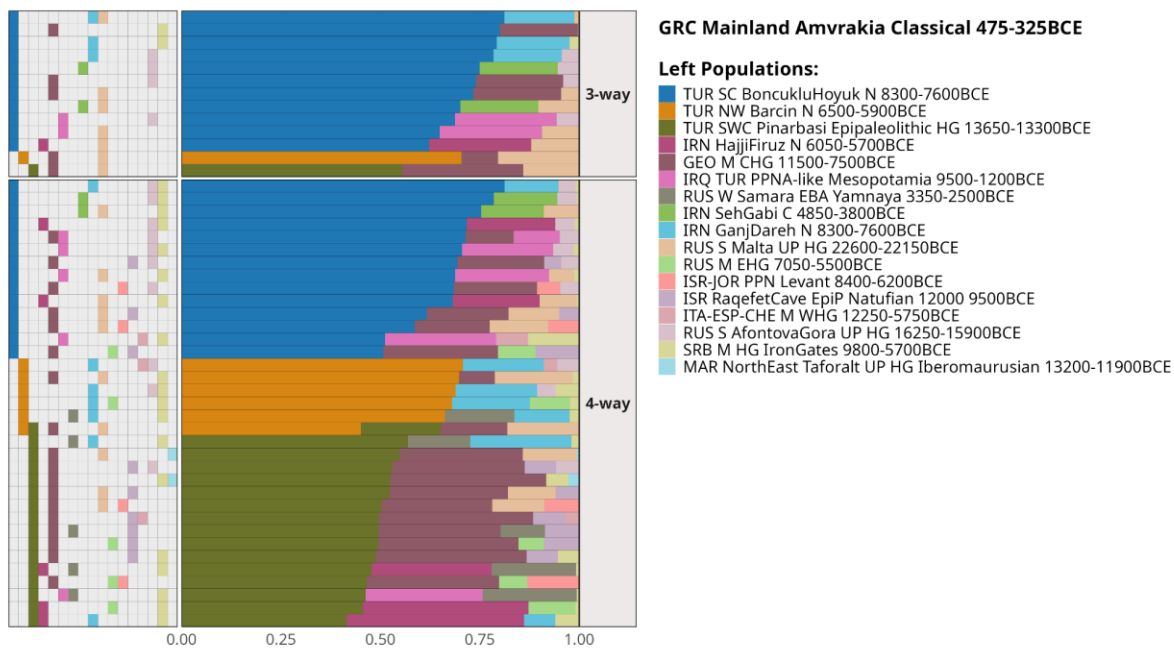

1888  
1889 D.

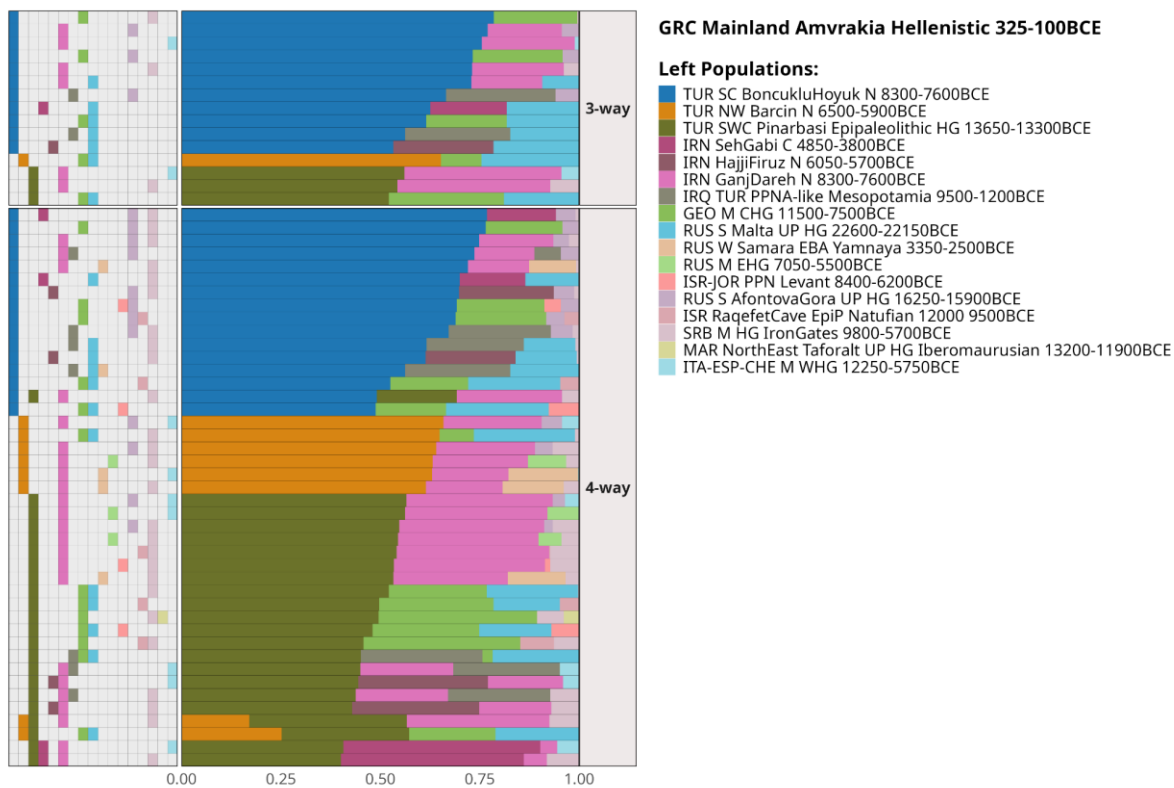

1890

1891 E.

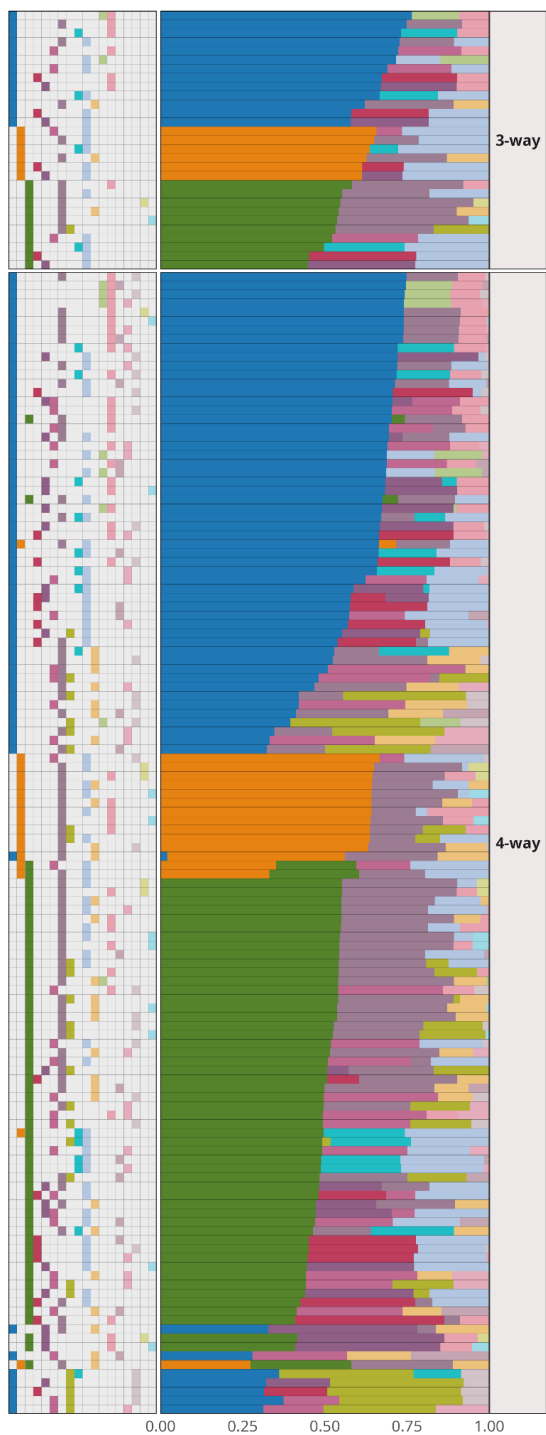

GRC Peloponnese Tenea Archaic 550-480BCE

- Left Populations:
- TUR SC BoncukluHoyuk N 8300-7600BCE
  - TUR NW Barcin N 6500-5900BCE
  - TUR SWC Pinarbasi Epipaleolithic HG 13650-13300BCE
  - IRN HajjiFiruz N 6050-5700BCE
  - IRQ TUR PPNA-like Mesopotamia 9500-1200BCE
  - GEO M CHG 11500-7500BCE
  - IRN GanjDareh N 8300-7600BCE
  - RUS W Samara EBA Yamnaya 3350-2500BCE
  - IRN SehGabi C 4850-3800BCE
  - RUS S Malta UP HG 22600-22150BCE
  - RUS M EH G 7050-5500BCE
  - IRN TepeHissar C BA 3700-1950BCE
  - RUS S AfontovaGora UP HG 16250-15900BCE
  - ISR-JOR PPN Levant 8400-6200BCE
  - ISR RaqefetCave EpiP Natufian 12000 9500BCE
  - MAR NorthEast Taforalt UP HG Iberomaurusian 13200-11900BCE
  - ITA-ESP-CHE M WHG 12250-5750BCE
  - SRB M HG IronGates 9800-5700BCE

1892

1893 F.

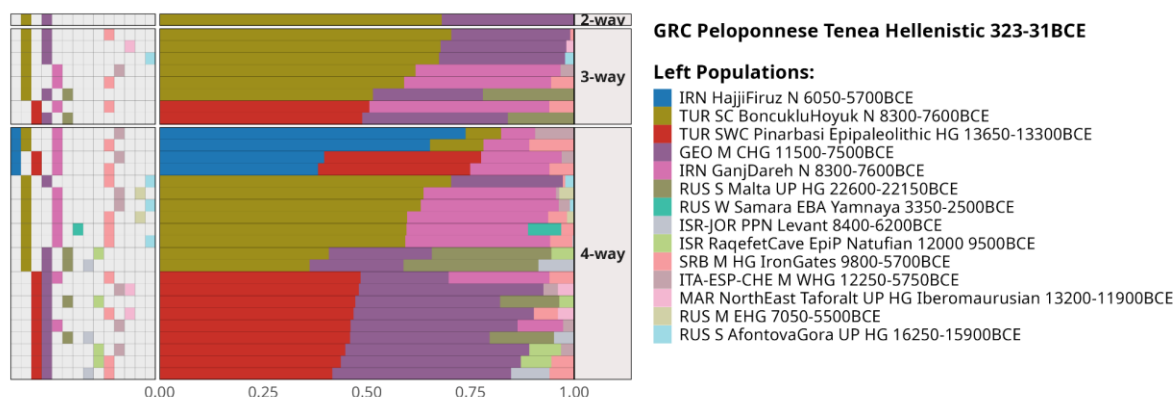

1894  
1895 G.

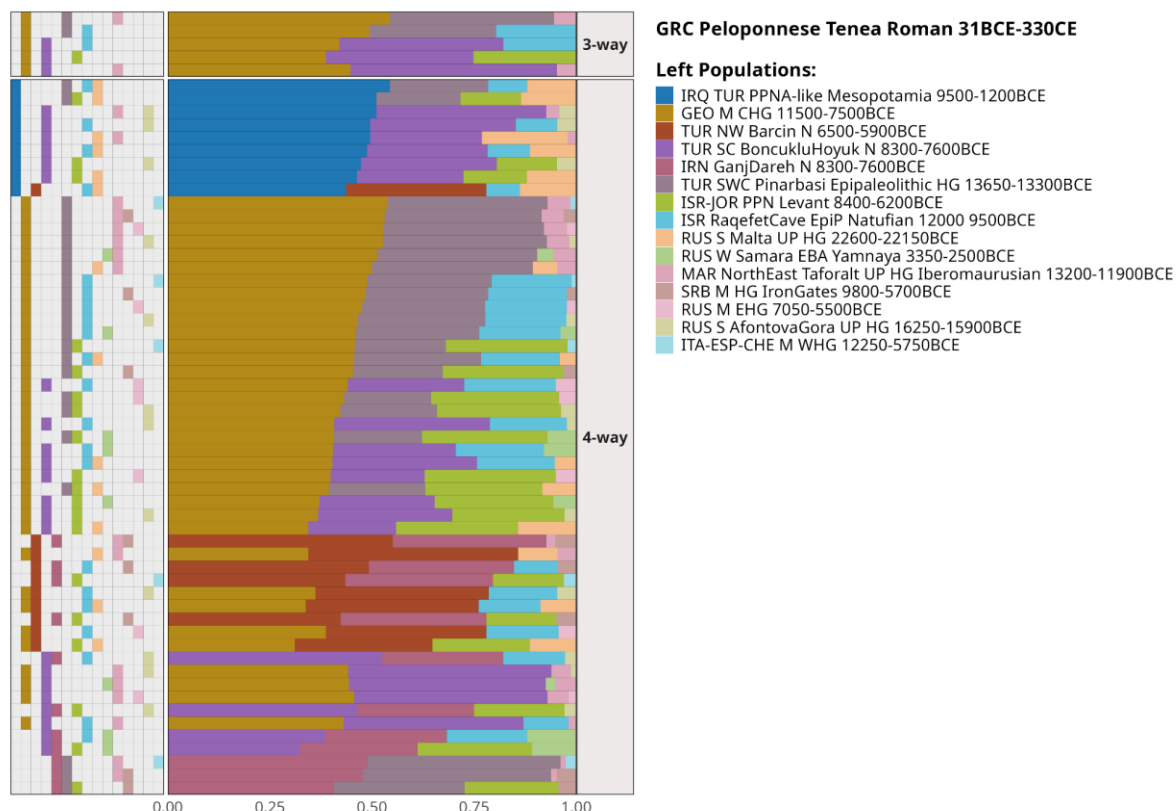

1896  
1897  
1898 **Supplementary Figure S36.** Horizontal stacked bar chart of qpAdm analyses results using  
1899 the “Ultimate” sample-set as putative sources. Only the feasible models with a p-value > 0.05  
1900 (accepted models) are shown with the points representing the populations involved and the  
1901 colors indicating their admixture proportions. The models were sorted based on the number  
1902 of involved sources (1-4). The tested target population is **A.** LBA Ammotopos **B.** Archaic  
1903 Amvrakia, **C.** Classical Amvrakia **D.** Hellenistic Amvrakia **E.** Archaic Tenea **F.** Hellenistic  
1904 Tenea **G.** Roman Tenea. The plots are available at Zenodo  
1905 (<https://doi.org/10.5281/zenodo.10848927>), too.



1906

A.

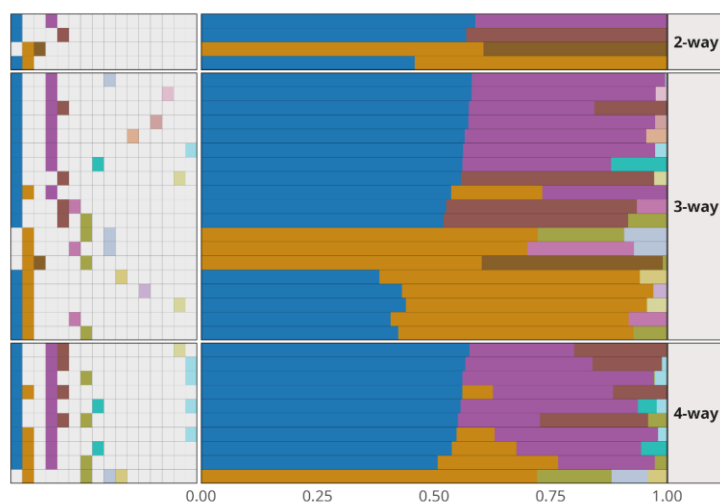

GRC Mainland Ammotopos LBA 1275-1125BCE

Left Populations:

- GRC Mainland North MBA 2100-1600BCE
- GRC EBA 2900-2000BCE
- ALB MBA 1900-1700BCE
- GRC Neolithic 6400-3600BCE
- GRC Crete EBA EMBA MBA 2900-1700
- ITA BA BellBeaker 2500-1900BCE
- ITA Sardinia MBA 1550-1300BCE
- GRC Crete LBA 1700-1250BCE
- RUS W Samara EBA Yamnaya 3350-2500BCE
- NW Balkans EBA-to-MLBA 2150-1250BCE
- GRC Peloponnese LBA 1600 1280BCE
- BGR EBA 3400-1600BCE
- ISR-JOR MLBA-to-LBA 2000-1285BCE
- TUR S-SW MBA-to-MLBA 2000-1300BCE
- ITA Sicily EBA 2300-1650BCE
- IRN TepeHissar C BA 3700-1950BCE

1907

1908

B.

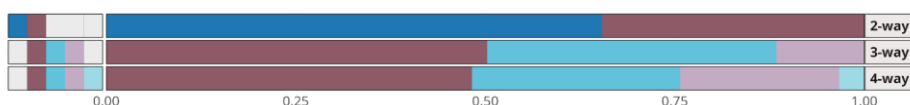

GRC Mainland Amvrakia Archaic 550-480BCE

Left Populations:

- GRC EBA 2900-2000BCE
- GRC Mainland North MBA 2100-1600BCE
- GRC Crete EBA EMBA MBA 2900-1700
- GRC Neolithic 6400-3600BCE
- IRN TepeHissar C BA 3700-1950BCE

1909

1910

C.

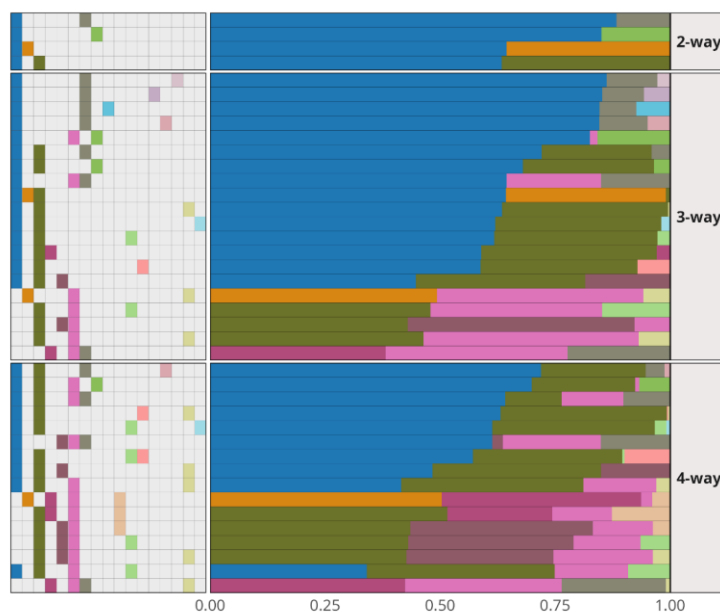

GRC Mainland Amvrakia Classical 475-325BCE

Left Populations:

- GRC EBA 2900-2000BCE
- ALB MBA 1900-1700BCE
- GRC Mainland North MBA 2100-1600BCE
- GRC Crete EBA EMBA MBA 2900-1700
- GRC Crete LBA 1700-1250BCE
- GRC Neolithic 6400-3600BCE
- RUS W Samara EBA Yamnaya 3350-2500BCE
- BGR-SER EBA-to-EMBA Yamnaya-like 2900-2000BCE
- NW Balkans EBA-to-MLBA 2150-1250BCE
- ISR-JOR MLBA-to-LBA 2000-1285BCE
- TUR S-SW MBA-to-MLBA 2000-1300BCE
- GRC Peloponnese LBA 1600 1280BCE
- BGR EBA 3400-1600BCE
- ITA Sicily EBA 2300-1650BCE
- ITA Sardinia MBA 1550-1300BCE
- IRN TepeHissar C BA 3700-1950BCE
- GRC StereaEllada LBA 1600-1300BCE

1911

1912 D.

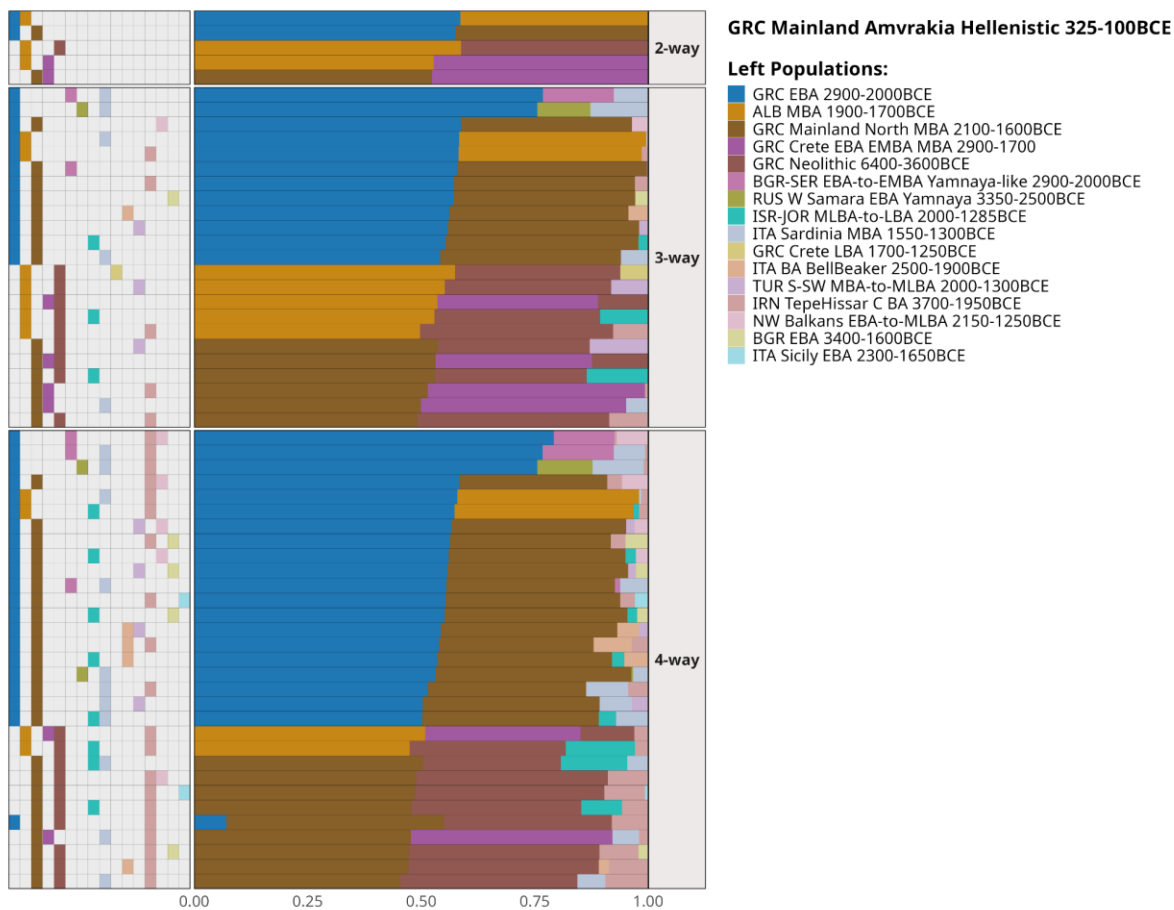

1913

1914 E.

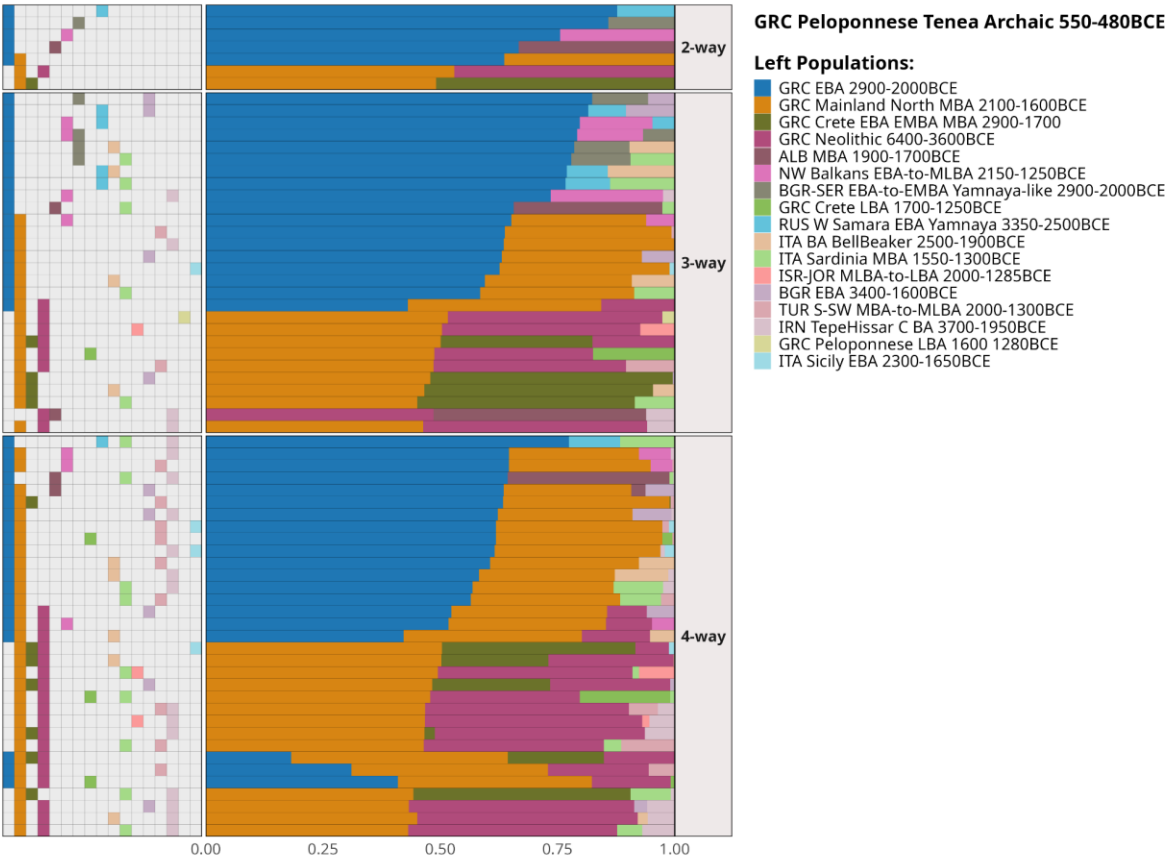

1915

1916 F.

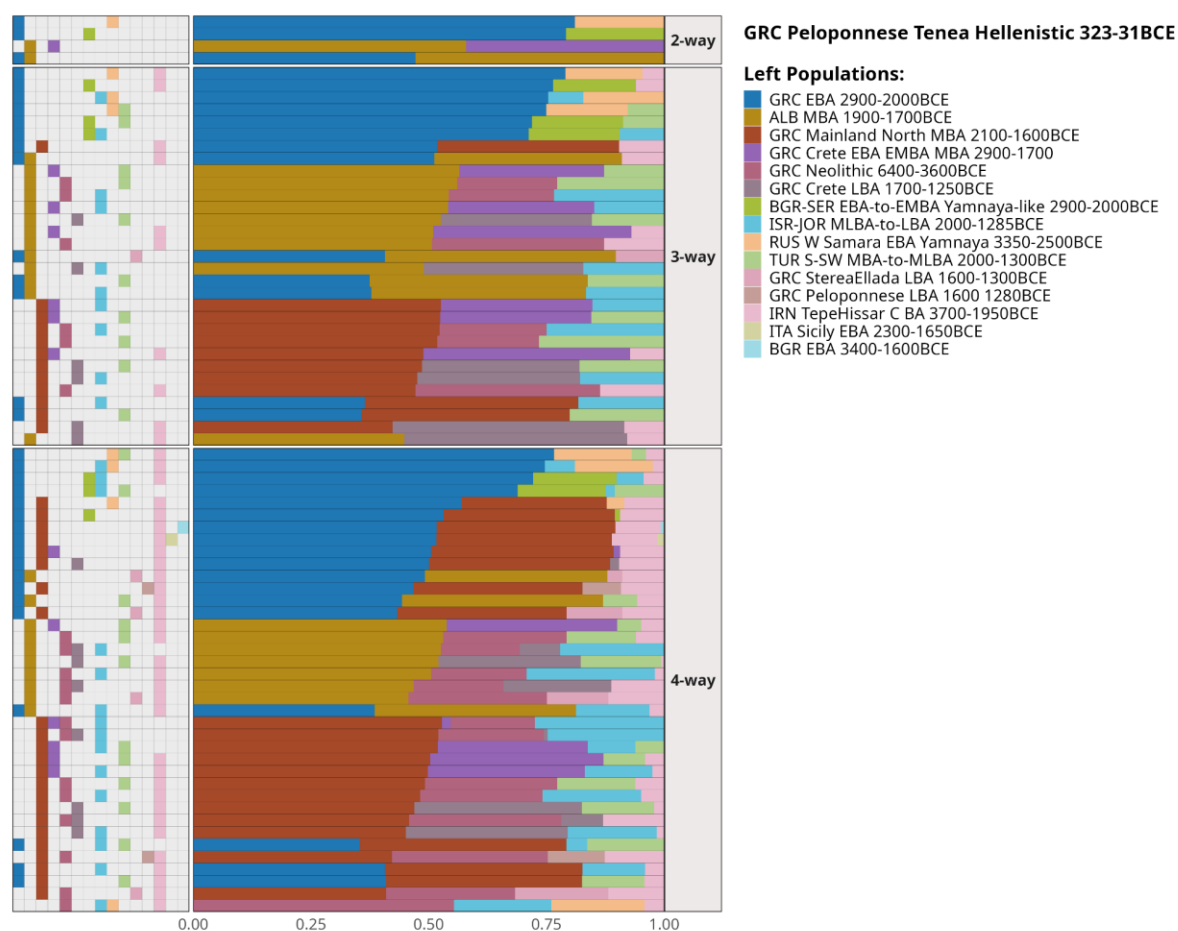

1917  
1918 **Supplementary Figure S37.** Horizontal stacked bar chart of qpAdm analysis results using the  
1919 “More\_proximate” sample-set as putative sources. Only the feasible models with a p-value >  
1920 0.05 (accepted models) are depicted with the points representing the populations involved,  
1921 and the colors indicating their admixture proportions. The models were sorted based on the  
1922 number of involved sources (1-4). The tested target population is **A.** LBA Ammotopos **B.**  
1923 Archaic Amvrakia, **C.** Classical Amvrakia **D.** Hellenistic Amvrakia **E.** Archaic Tenea **F.**  
1924 Hellenistic Tenea The analyses for Roman Tenea did not produce any feasible model. The  
1925 plots are available at Zenodo (<https://doi.org/10.5281/zenodo.10848927>), too.

1928

A.

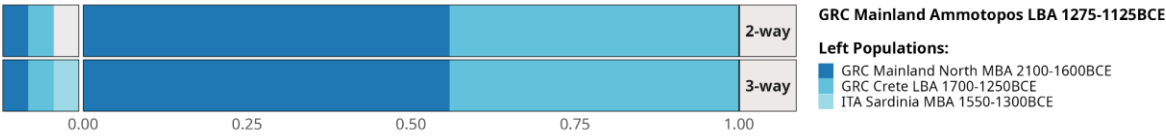

1929

1930

B.

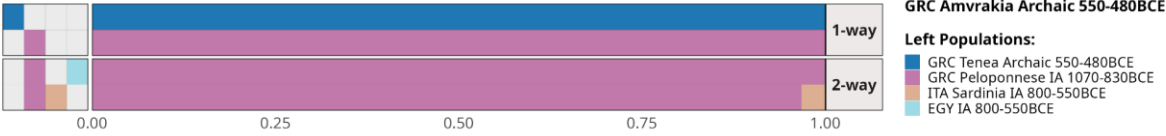

1931

1932

C.

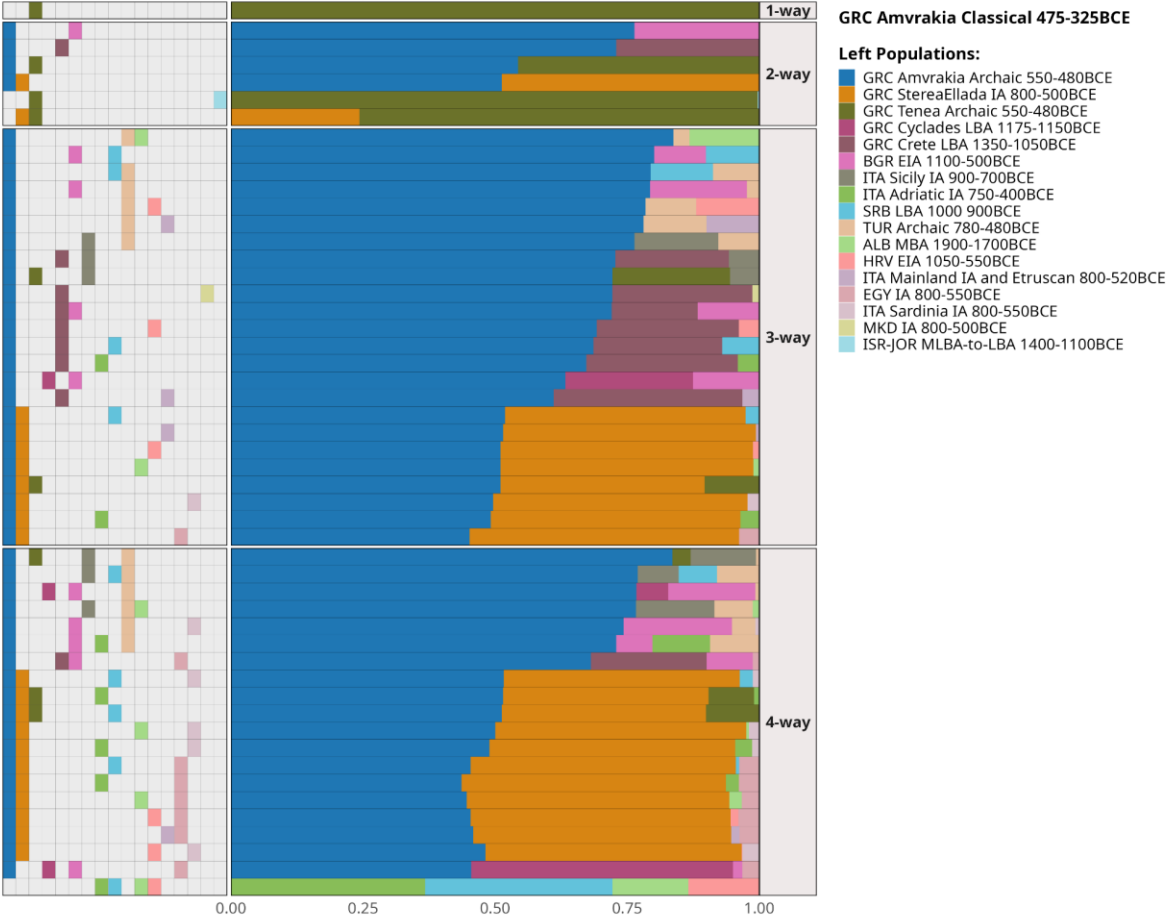

1933

1934



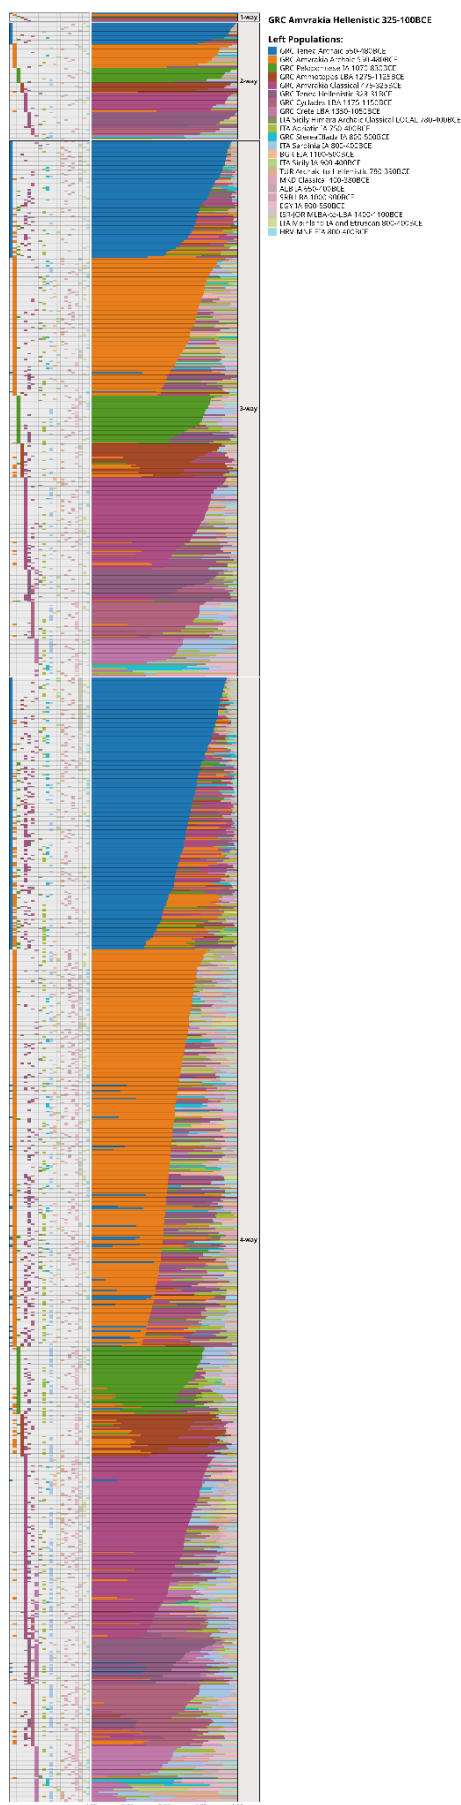

1937 E.

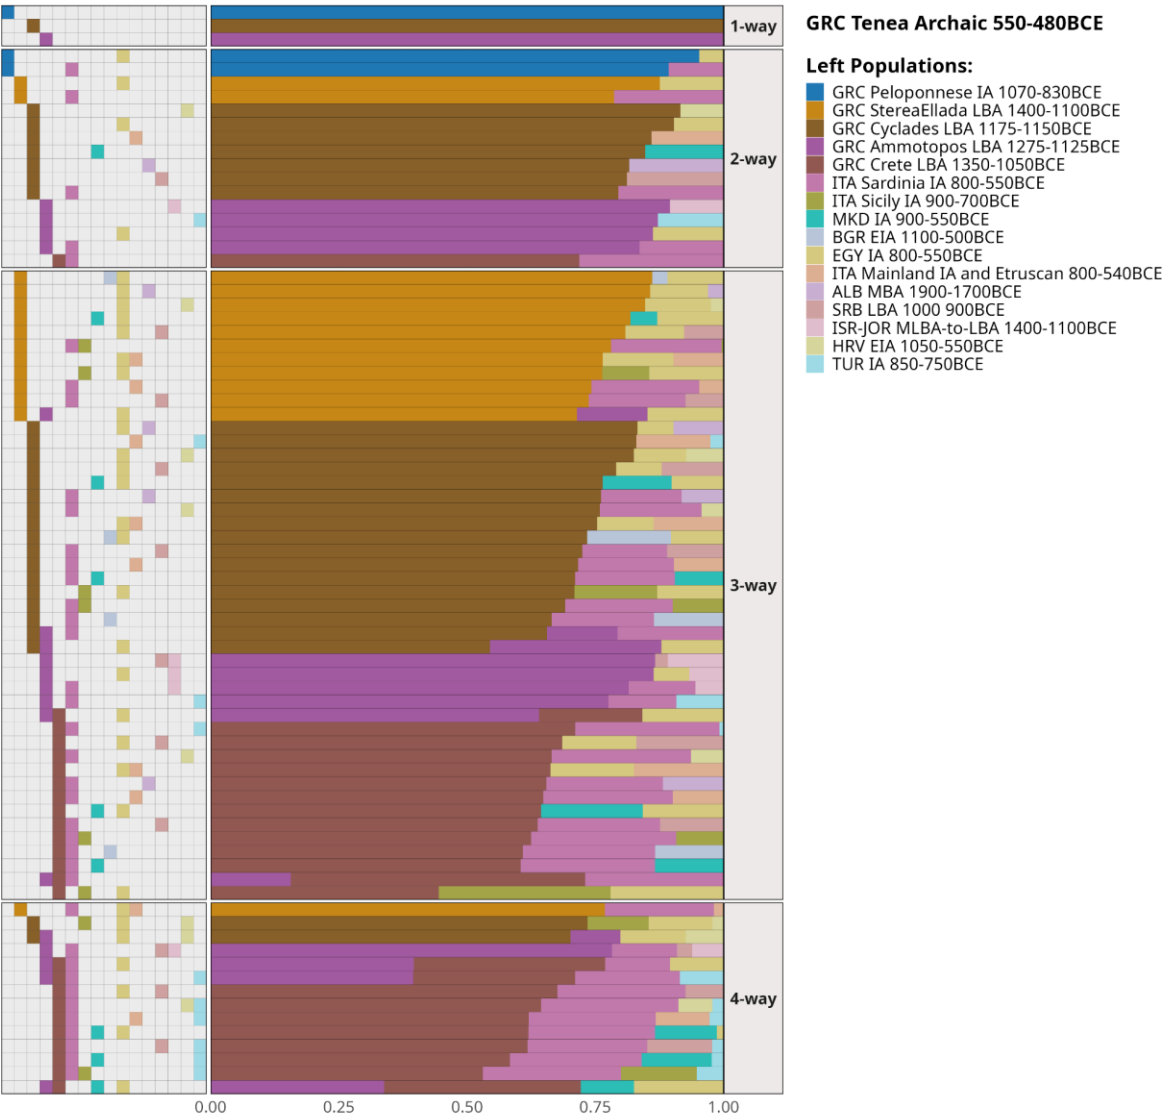

1938  
1939

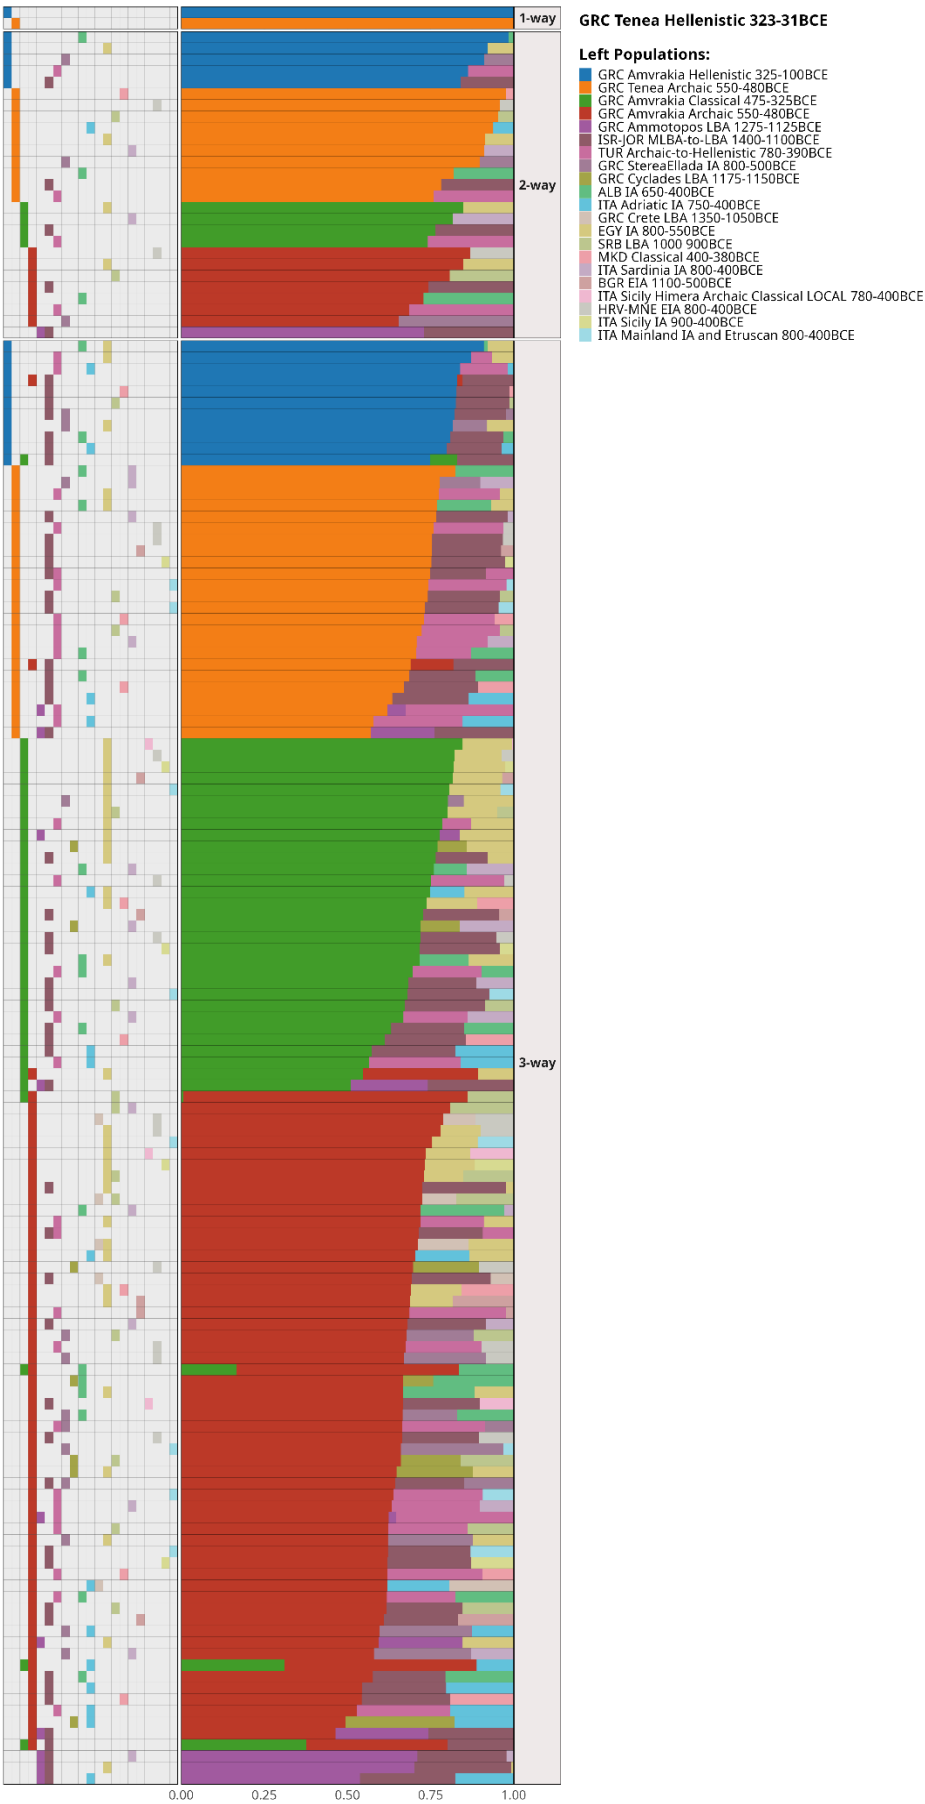

G.

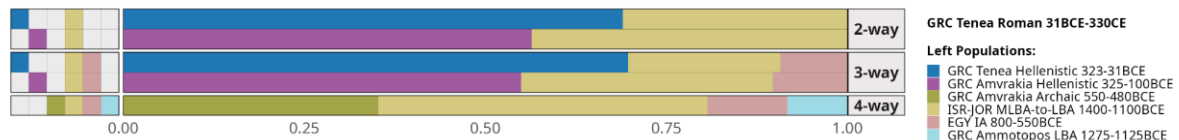

**Supplementary Figure S38.** Horizontal stacked bar chart of qpAdm analyses results using the “Most\_proximate” sample-set as putative sources. Only the feasible models with a p-value > 0.05 (accepted models) are depicted with the points representing the populations involved and the colors indicating their admixture proportions. The models were sorted based on the number of involved sources (1-4). **A.** LBA Ammotopos **B.** Archaic Amvrakia, **C.** Classical Amvrakia **D.** Hellenistic Amvrakia **E.** Archaic Tenea **F.** Hellenistic Tenea **G.** Roman Tenea. For better visualization, the plots are available at Zenodo (<https://doi.org/10.5281/zenodo.10848927>), too.

The f3 analyses were performed using the R interface [148] of ADMIXTOOLS2 v.2.0.0, again deploying, as separate targets, the focal populations (Ammotopos, Amvrakia, Tenea) during different time periods (LBA, Archaic, Classical, Hellenistic, Roman, etc). The Outgroup f3 analyses were performed in order to estimate the genetic distance between a given target and a given set of other populations (members of the “Most-proximate” sources, as well as contemporary and subsequent populations of each target, i.e., for Classical Amvrakia we estimated the genetic distance to Archaic Amvrakia, but also to Hellenistic Amvrakia, Roman Tenea etc; see **Additional file 4** for details). As an outgroup population we used, in separate runs, the modern African Yoruba population and the modern East Asian Han population. Additionally, within-population genetic similarity levels were estimated by calculating the pairwise Outgroup f3 values within each population and within a given period (**Figure 4B**). In calculations including outgroups, a higher f3 value indicates that the target is more similar to other tested population(s). The script is provided at <https://doi.org/10.5281/zenodo.10848927> and includes the following R packages: Hmisc v.5.1-2 [149] and stringr. The Outgroup f3 results are plotted in **Supplementary Figure S39**, whereas all the Outgroup f3 outputs are provided at <https://doi.org/10.5281/zenodo.10848927>. All f3 calculations were performed using f2-block computations (`f2_from_geno`; [https://uqrmaie1.github.io/admixtools/reference/f2\\_from\\_geno.html](https://uqrmaie1.github.io/admixtools/reference/f2_from_geno.html)) and f2-blocks were calculated distinctly for all population triplets. Parameter *maxmiss* was set to 0.1 and *adjust\_pseudohaploid* was set to TRUE as the data are pseudohaploidized. In order to determine f3 values for the newly sequenced genomes, each individual was singled out and f3 calculations were repeated for each individual being the only representative of the population (**Supplementary Figure S39**, gray dots). Hence, individual estimates were computed for all samples. In the cases of close genetic relatedness (1st and 2nd degrees), the population estimate (**Supplementary Figure S39**, red dots) was computed by only retaining the genome with higher coverage.

Regarding the Outgroup f3 tests, we observed similar results using either Yoruba or Han as the outgroup population, with the differences mostly being concentrated in the more distant populations in relation to each target. Overall, in most cases, the target population had the highest genetic similarity with populations from the geographic area of present-day Greece, indicating a general genetic continuity.

A

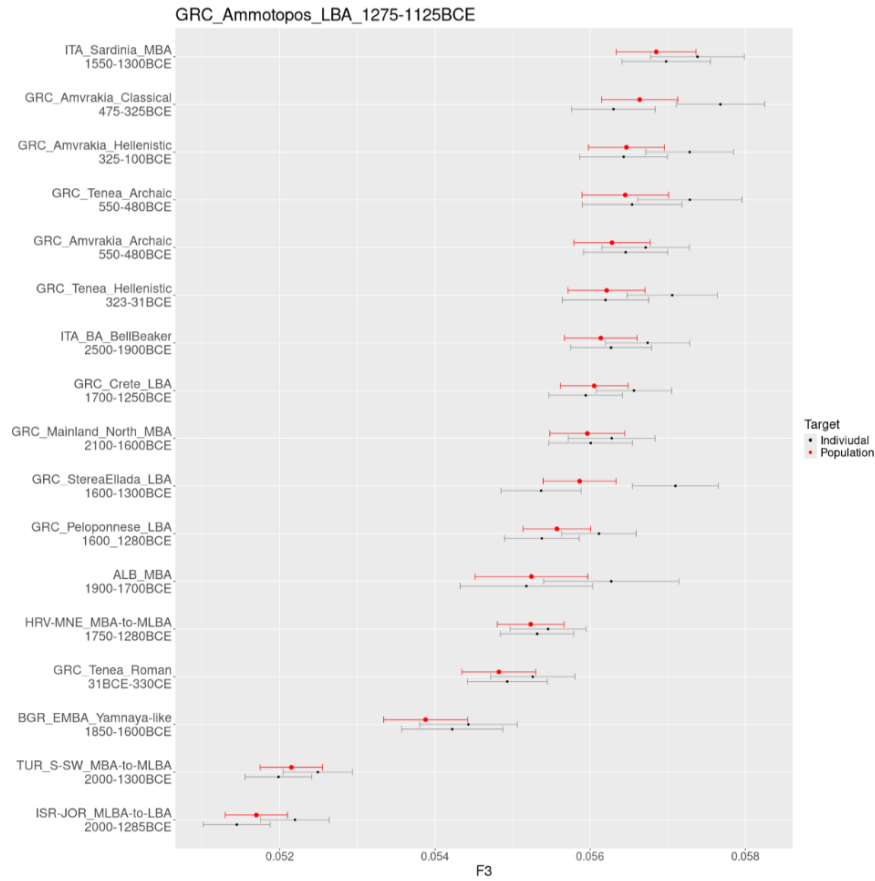

B

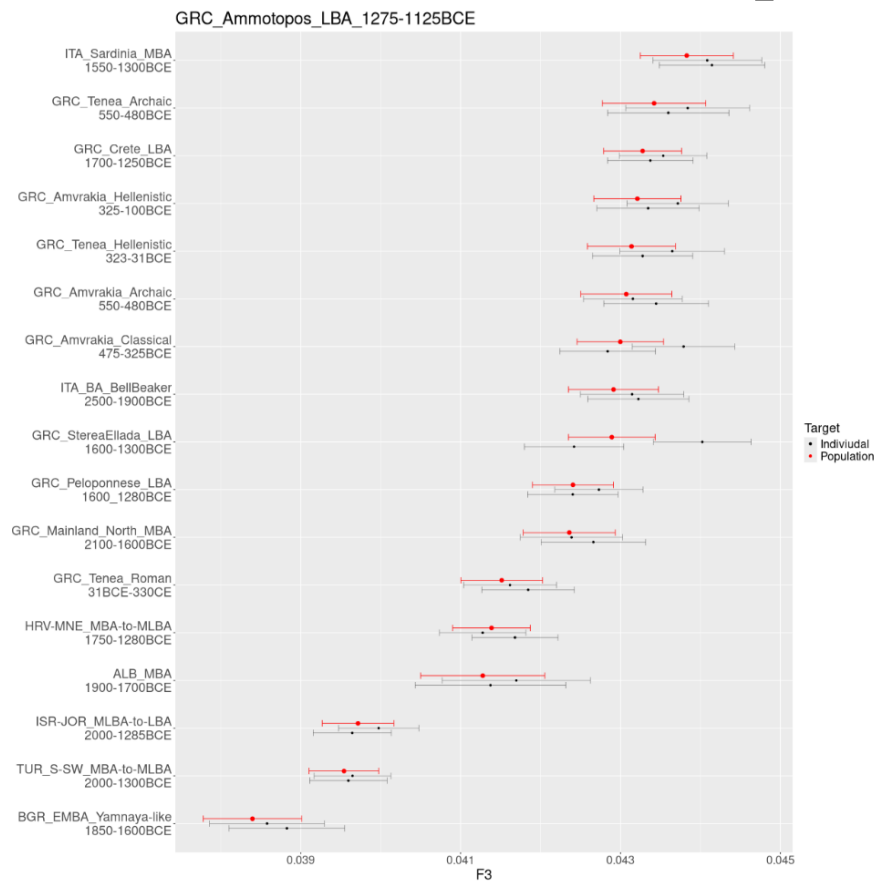

C

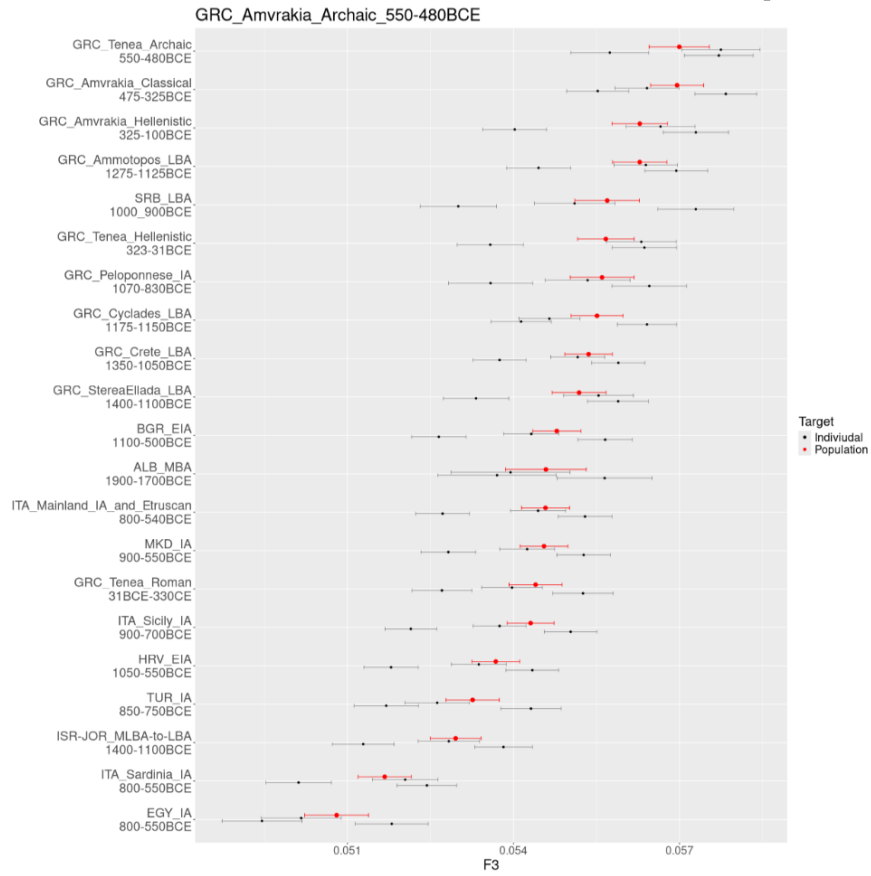

D

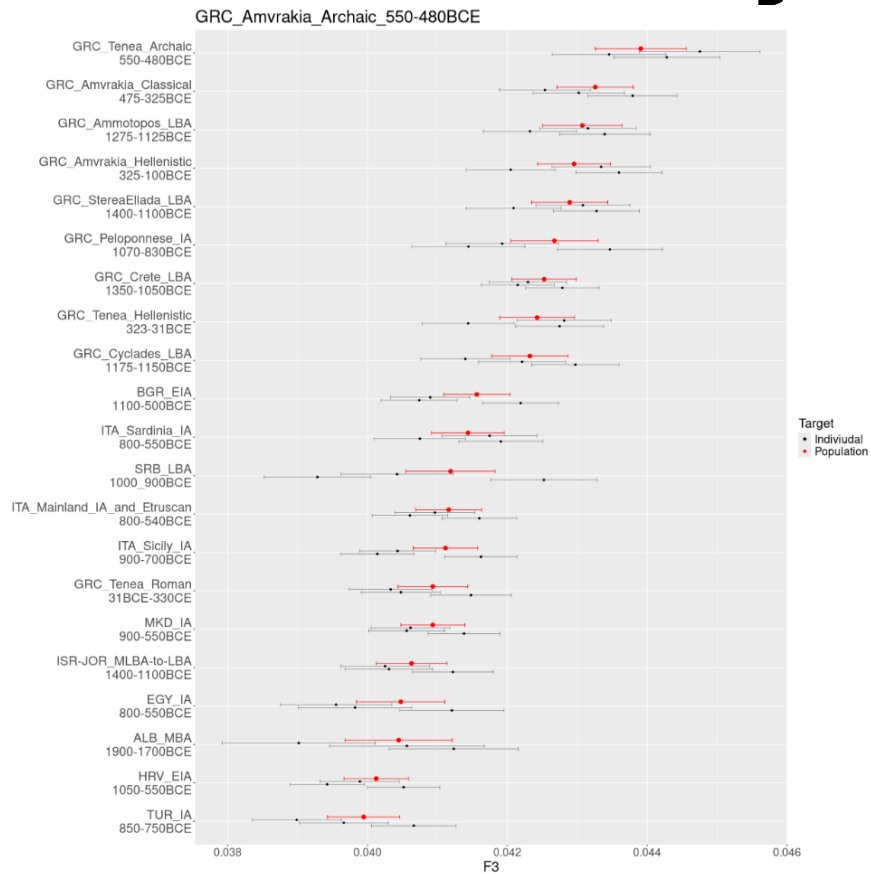



E

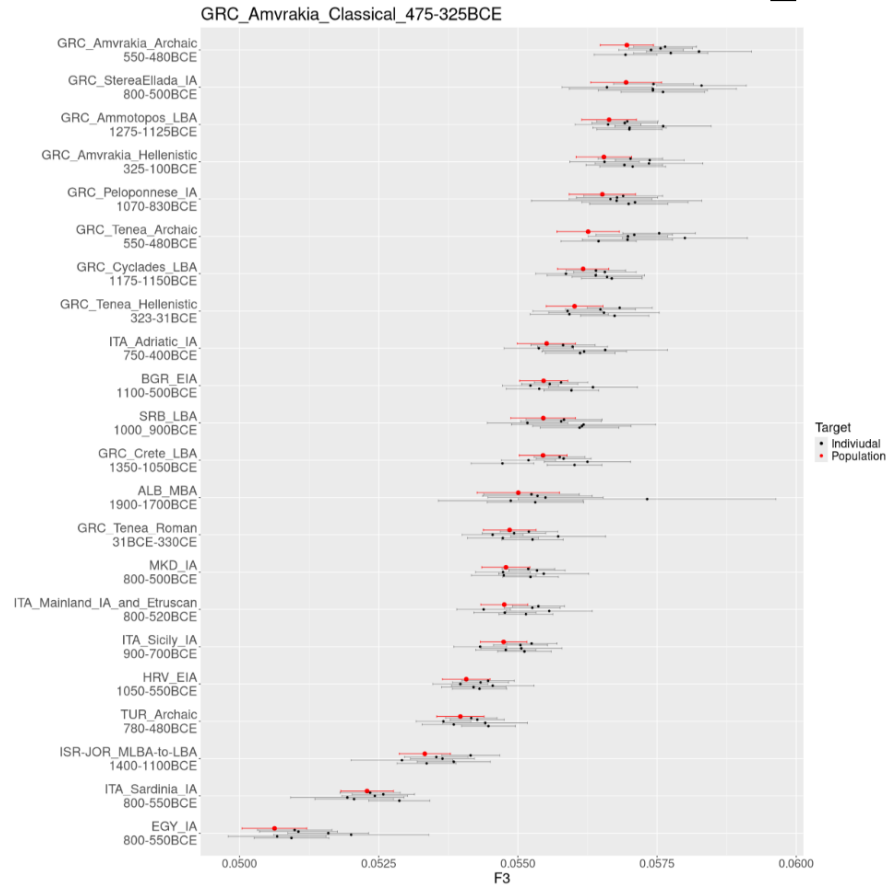

F

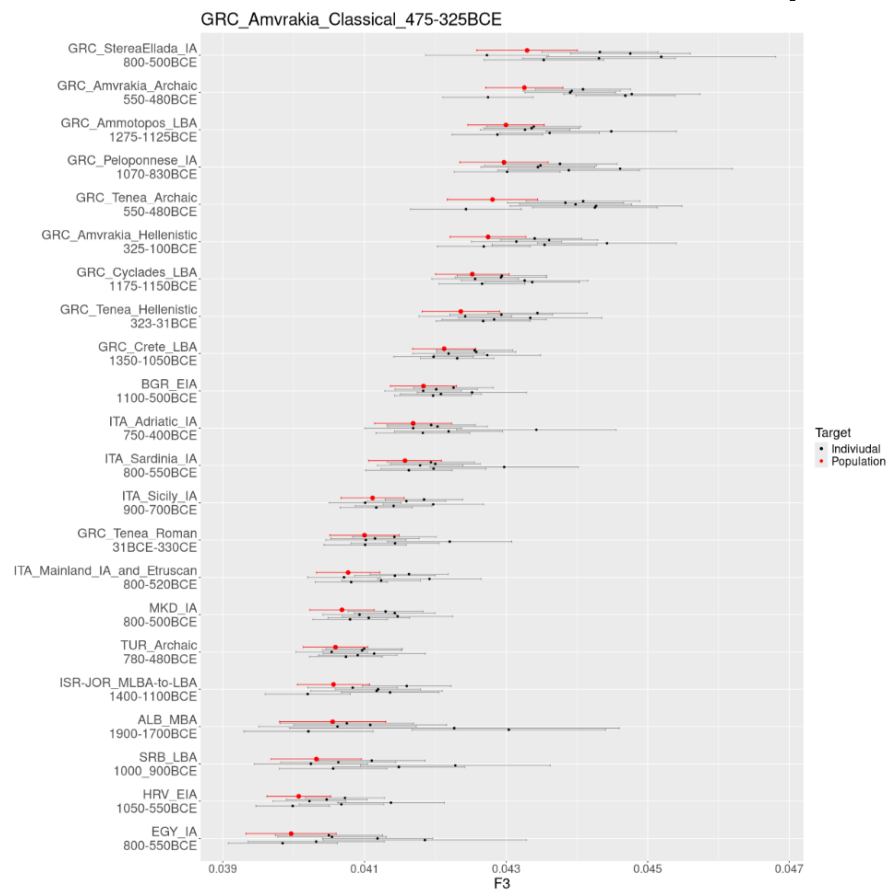

G

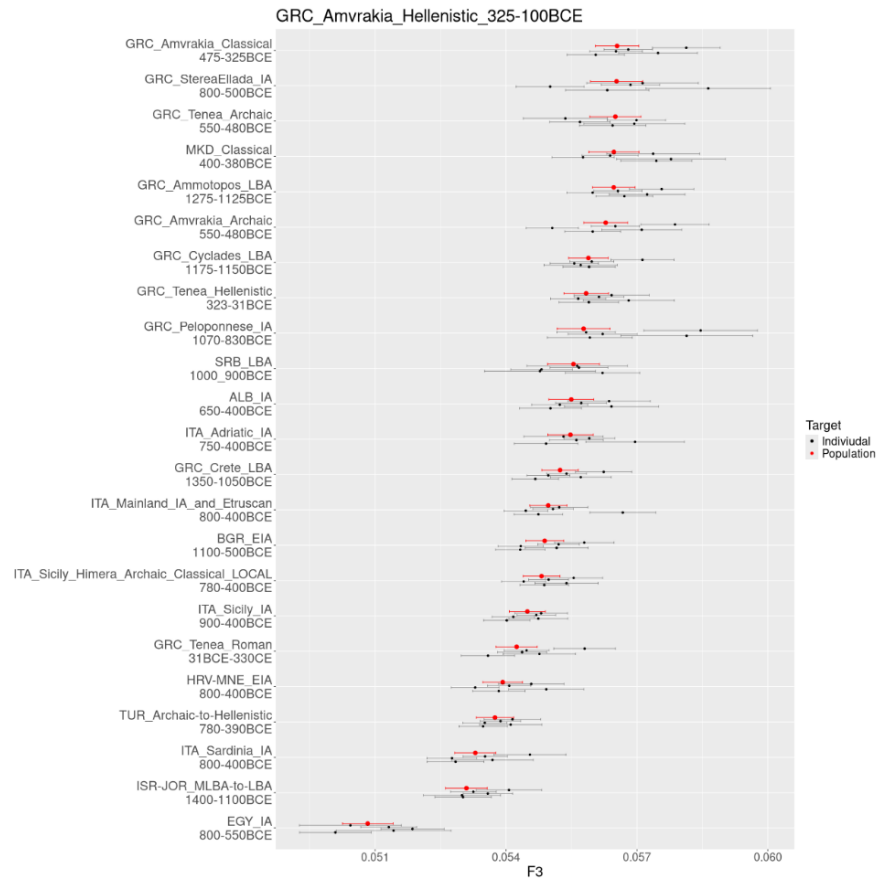

H

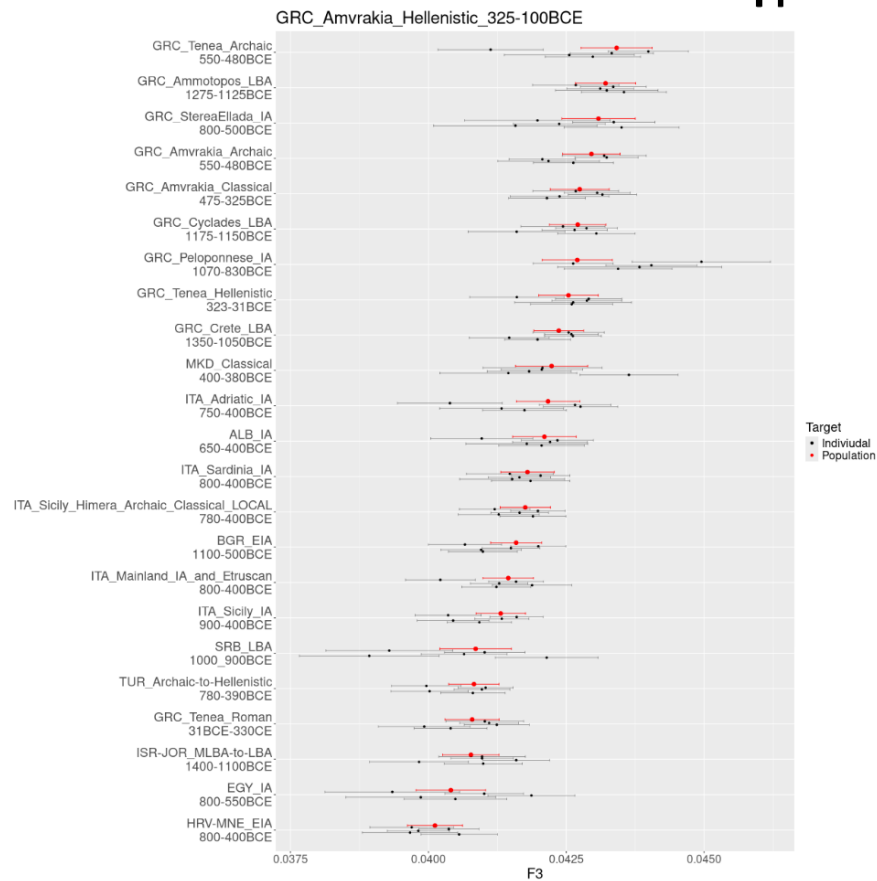

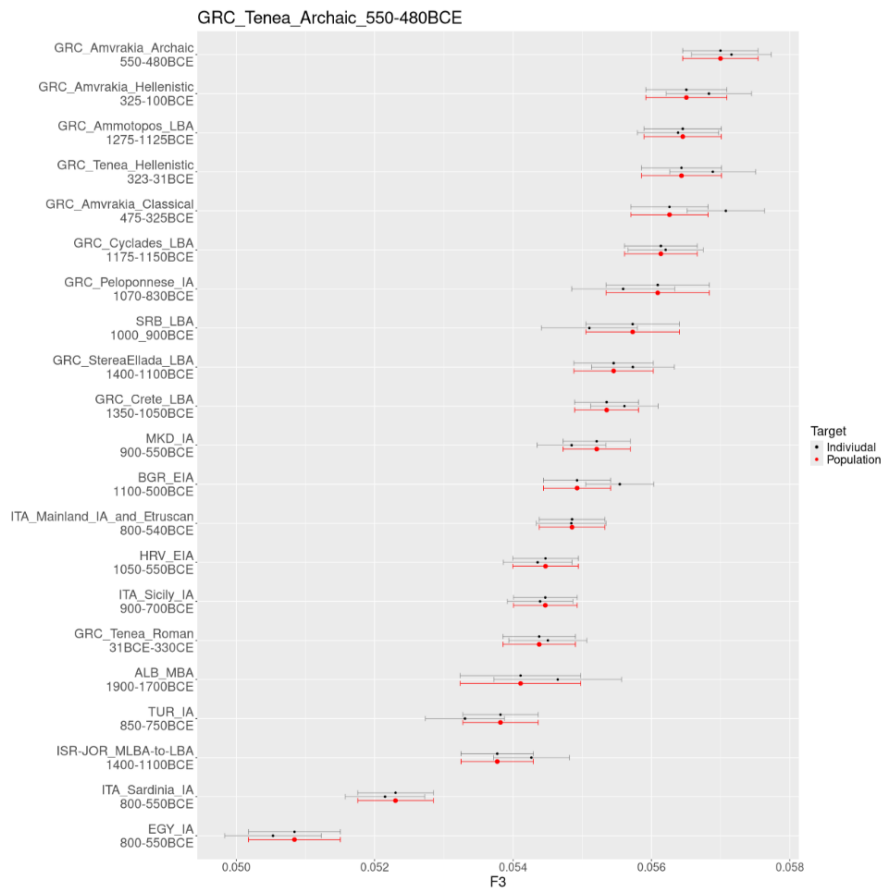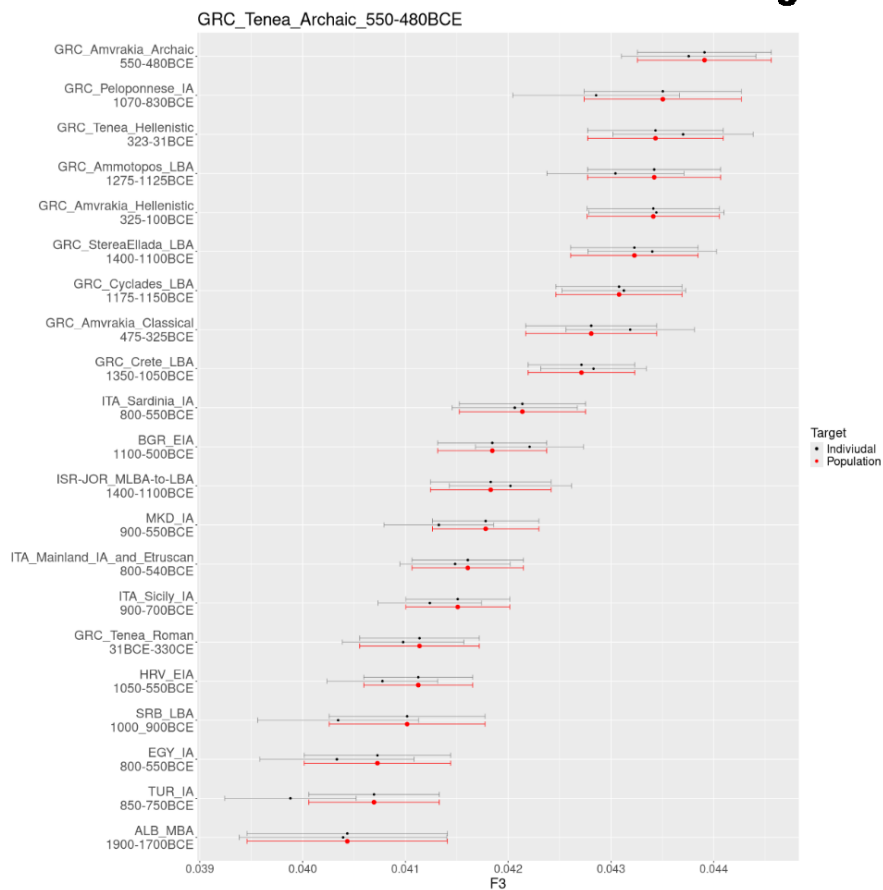

K

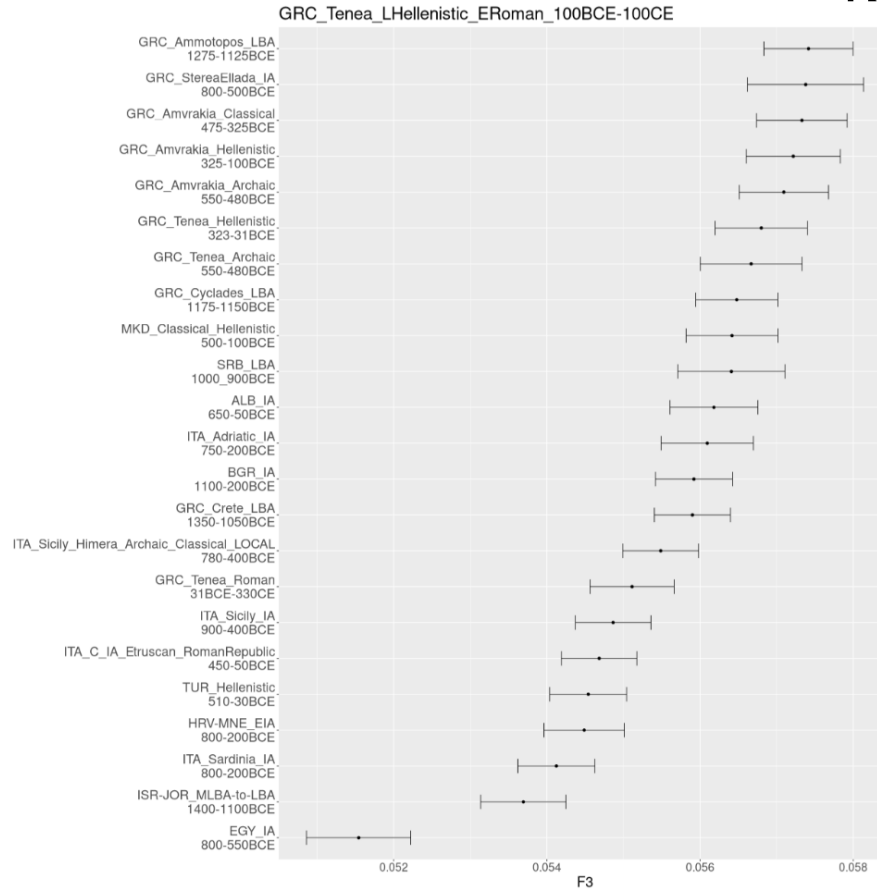

L

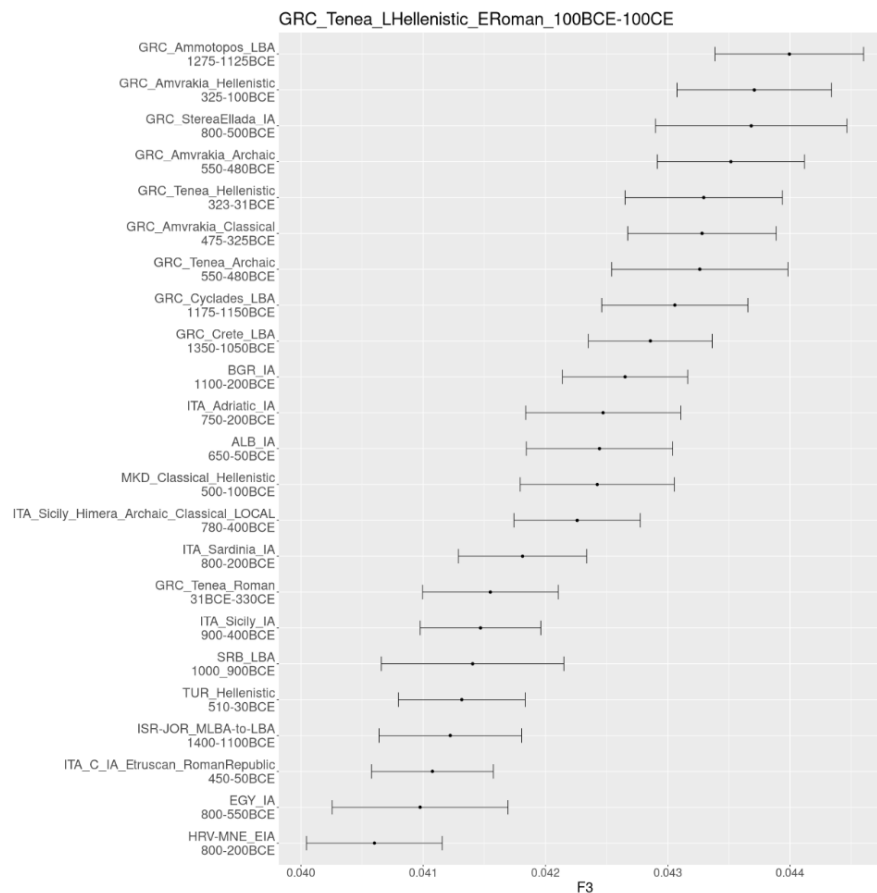

M

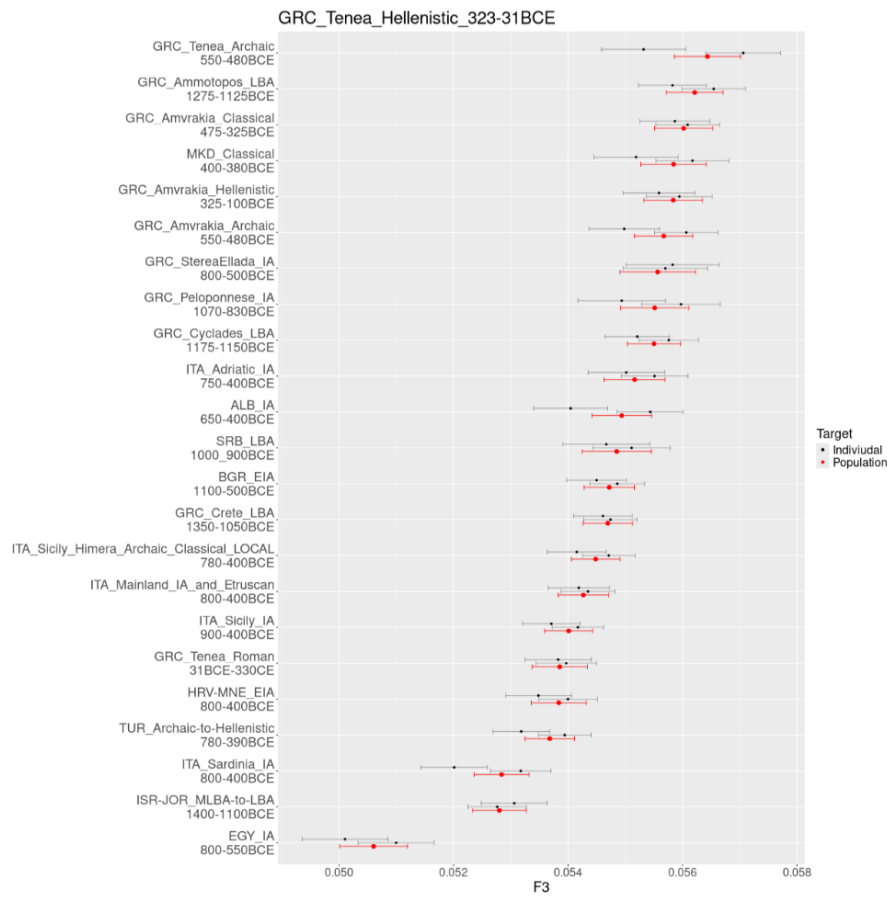

N

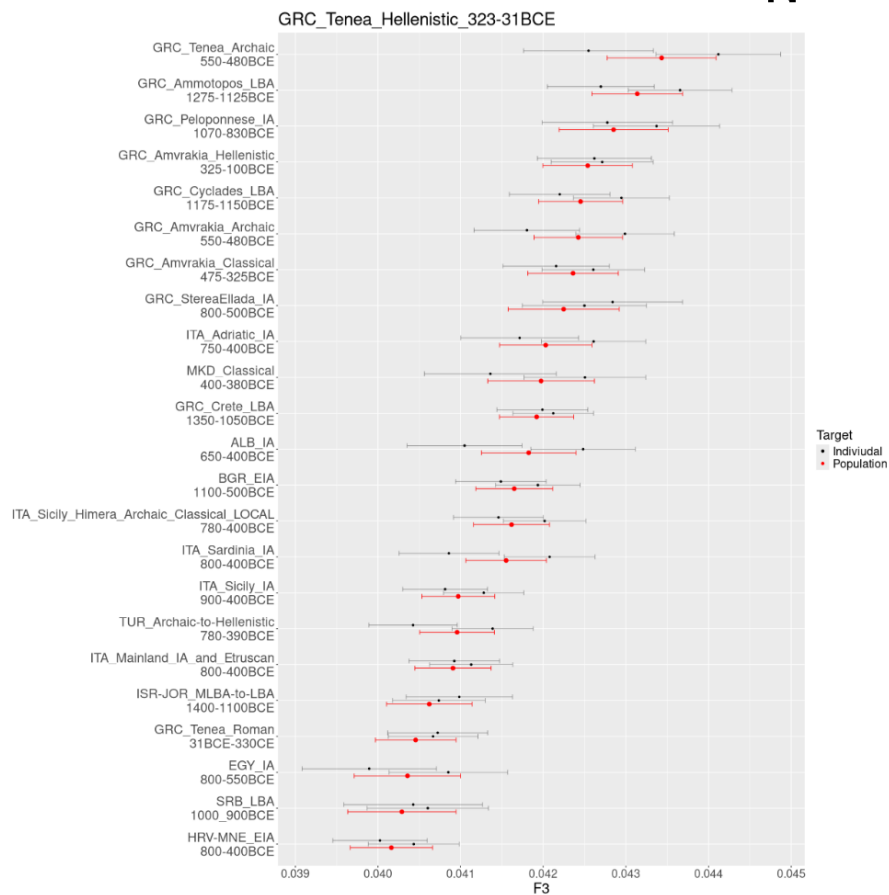

O

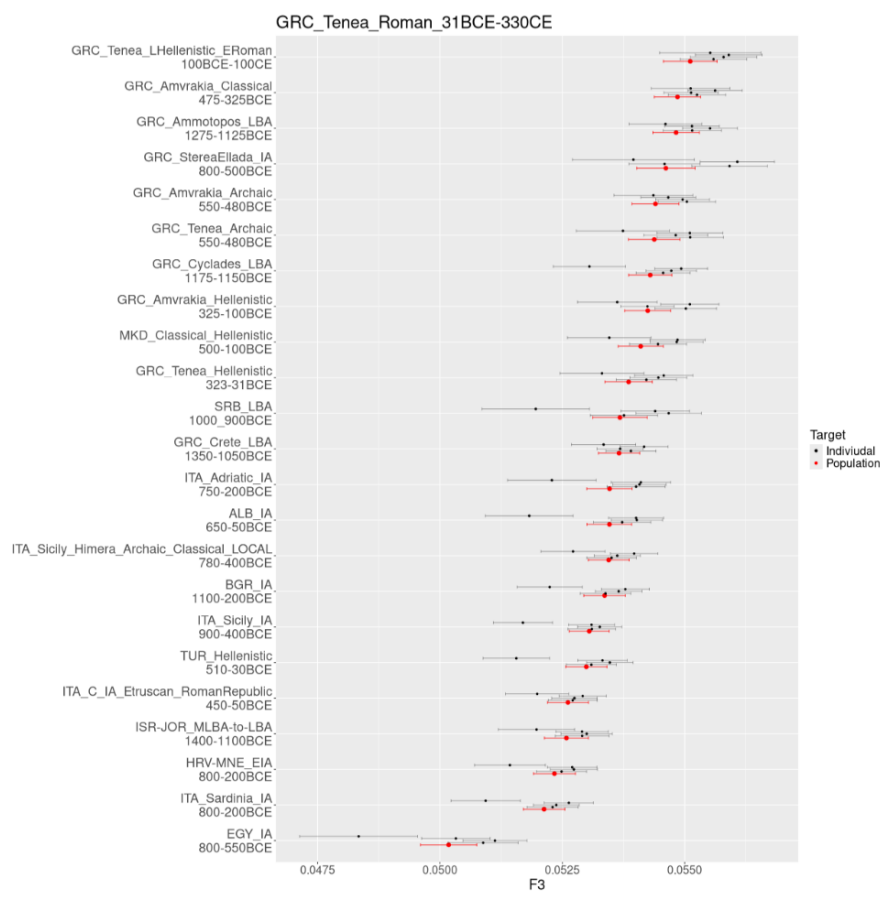

P

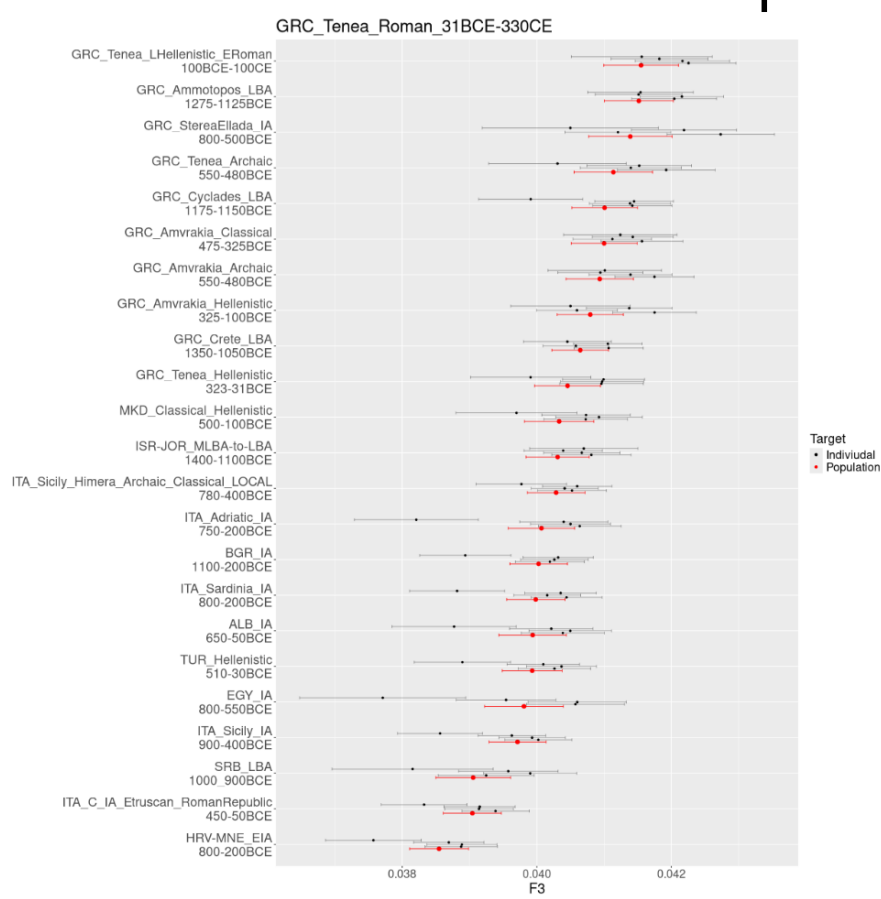



1994 **Supplementary Figure S39.** Pairwise outgroup f3 tests between a given target and members  
1995 of the “Most-proximate” sources set and contemporary and subsequent populations of each  
1996 target, estimating the genetic distance between them (the higher the f3 value the lower the  
1997 genetic distance). As outgroups we use the modern African Yoruba population (**upper plots;**  
1998 **A, C, E, G, I, K, M, O**) and the modern Eastern Asia Han population (**lower plots; B, D, F, H,**  
1999 **J, L, N, P**). Targets are **A-B**) LBA Ammotopos, **C-D**) Archaic Amvrakia, **E-F**) Classical  
2000 Amvrakia, **G-H**) Hellenistic Amvrakia, **I-J**) Archaic Tenea, **K-L**) Late Hellenistic - Early Roman  
2001 Tenea, **M-N**) Hellenistic Tenea, and **O-P**) Roman Tenea. Abbreviations are given in **Figure 2**.  
2002 The plots are individually available at Zenodo (<https://doi.org/10.5281/zenodo.10848927>), too.

## 2003 3.6 Phenotypes

2004 **Angelos Souleles**

### 2005 3.6.1. Pigmentation

2006 For hair, eye, and skin color prediction, we deployed the widely used HirisPlex-S  
2007 [150,151] tool. We employed imputed data (see Section 3.5.5) for the 41 SNPs associated  
2008 with HirisPlex-S, as recent studies have demonstrated that imputed data can reliably predict  
2009 phenotypes, even for individuals with a coverage as low as 0.10-0.50× [152]. All newly  
2010 generated genomes of the present study have >0.1× mean coverage depth. To minimize  
2011 errors associated with reference-based imputation, we used BCFtools v.1.15 and its *filter*  
2012 function to only retain genotypes from imputed SNPs if they had an INFO score of 0.50 or  
2013 higher (`-e 'INFO/INFO<=0.5'`). For the remaining HirisPlex-S SNPs with INFO score less  
2014 than 0.50, we followed a similar approach as Marchi et al. [113]. We examined the BAM files  
2015 directly using SAMtools v.1.15. We then created two HirisPlex-S input files for each individual:  
2016 one by replacing missing genotypes with homozygous genotypes for the most abundant allele  
2017 in the BAM file (*\_main* in **Additional file 5; HirisPlex-S\_raw\_results sheet**), and another one  
2018 by replacing missing genotypes with heterozygous genotypes (*\_secondary* in **Additional file**  
2019 **5; HirisPlex-S\_raw\_results sheet**) to account for the uncertainty in heterozygosity  
2020 observation associated with low-coverage aDNA data. However, for SNPs rs312262906 and  
2021 rs201326893, we did not need to apply the aforementioned approach, because the presence  
2022 of an alternative allele at each of the two SNPs sites predicts red hair with a probability of  
2023 ~1.00 [151]. For both of these SNPs, we replaced missing genotypes with homozygous  
2024 genotypes for the reference allele (0/0) for both main and secondary input files.

2025 The color interpretations are detailed in **Additional file 5 (HirisPlex-**  
2026 **S\_interpretations sheet)**. When both, the main, and the secondary probabilities exceeded  
2027 0.70, the predicted phenotype was accepted. In other cases, the phenotype with the highest  
2028 and the second highest probability in the main run was accepted. This is based on the  
2029 indication that the second most likely category can influence the main category phenotype  
2030 [150,153]. Our approach reliably determined eye color, skin color, and hair shade for all  
2031 individuals, with hair color results being available for 19 out of the 26 individuals. All individuals  
2032 showed the highest probability for brown eyes. Most individuals likely had an intermediate skin  
2033 tone, while three of them had a darker skin color (two from Classical Amvrakia and one from  
2034 Roman Tenea). Similarly, most individuals likely had brown hair with a dark shade. Notably,  
2035 despite our attempts to eliminate false positive results for red hair, the Late Hellenistic - Early  
2036 Roman individual from Tenea still exhibited a high probability for this phenotype.

2037 In addition, we examined the TYR variant rs1042602, which has been associated with  
2038 the absence of freckles [154,155]. Among the 26 individuals analyzed, eight were homozygous  
2039 for the allele linked to absence of freckles, 13 were heterozygous, and five did not carry the  
2040 allele.

2041

### 2042 3.6.2. Monogenic Phenotypes

2043 Genotypes associated with metabolic traits (lactase persistence and sensitivity to fats)  
2044 and human muscle strength and composition (muscle contraction type and muscle  
2045 performance) were manually examined directly in the BAM files using SAMtools, as described  
2046 above. The allele counts from the corresponding reads are provided in **Additional file 5**

2047 **(Monogenic\_traits\_counts sheet)**. For each genotype, the number of individuals covering  
2048 the SNP varied (MCM6: n=14; FABP2: 15; ACTN3: 15; ACVR1B: 11). None of these  
2049 individuals were found to be lactose tolerant, including the more recent ones. Seven  
2050 individuals showed a moderately increased sensitivity to fats; however, four of them only had  
2051 one single read at the specific genomic position, yielding these results inconclusive. Regarding  
2052 muscle performance, eight individuals had an ACTN3 genotype associated with improved  
2053 muscle performance as typically seen in sprinters (three of whom had only one read), whereas  
2054 seven individuals likely had impaired muscle performance (three of these only had one read).  
2055 Lastly, five individuals had higher muscle strength associated with the ACVR1B gene, with  
2056 one individual only having one read. Additionally, we examined 29 SNPs associated with beta  
2057 thalassemia (and malaria resistance), as it is the most common genetic disorder in modern  
2058 Greece [156,157]. However, no alleles associated with beta thalassemia were found in any of  
2059 the newly sequenced ancient Greek individuals.

## 3.7 Microbial Metagenomics

### *Nikolaos Psonis*

For the microbial metagenomics analyses, we used the FastQ files with the fully (non-truncated) collapsed reads as input that were produced by the residual adapter trimming step of the mapache pipeline (see **section 3.2.1** above). Hence, ancient microbial DNA screening analyses were performed at the FastQ level and not at the individual level. Due to its large size, one FastQ file (165\_lys2\_ex1\_L1\_fq\_collapsed) had to be split into multiple ones of equal size (four in total), using fastqsplitters v.1.2.0 (<https://github.com/LUMC/fastqsplitters>) in order to be used in downstream metagenomic analyses. The taxonomic assignment (using a k-mer based approach) of each sequence was performed with v.1.0.4 KrakenUniq [158], a Lowest Common Ancestor (LCA) sequence alignment was performed with MALT v.0.61 [159], and authentication and validation of putative microbial species was conducted with the *MaltExtract* function of HOPS v.0.35 [160]. All the aforementioned software tools were used as implemented in the v.1.0.0 aMeta [161] pipeline by using the snakemake v.7.18.2 [60] workflow manager. As a reference database, we used the pre-built microbial NCBI non-redundant *nucleotide* (<https://www.ncbi.nlm.nih.gov/nucleotide/>) database (*microbial-NT*) provided by aMeta. This database contains records until June 2020 and includes all microbial (archaea, bacteria, fungi, protozoa, parasitic\_worms, viruses) organisms, plus the human reference genome and a few other complete eukaryotic genomes (i.e. *Caenorhabditis elegans*, *Canis lupus*, *Micromonas commoda*, *Chloropicon primus*, *Cyanidioschyzon merolae*, *Ostreococcus lucimarinus*). All computational analyses were conducted on an AMD EPYC 7452 system with 64 physical cores and 1 TB of RAM running Ubuntu 20.04.6 LTS.

No microbial DNA belonging to ancient systemic pathogens was detected in any of the samples examined (**Additional file 6**; metagenomic overview heatmap score >8). In dental samples, however, we did observe DNA traces belonging to ancient human oral bacteria (and/or are considered common dental pathogens causing diseases, such as gingivitis), including *Porphyromonas gingivalis*, *Tannerella forsythia*, *Streptococcus gordonii*, *Streptococcus anginosus*, *Streptococcus intermedius*, *Capnocytophaga sputigena*, *Eikenella corrodens*, *Neisseria elongata*, *Parvimonas micra*, *Streptococcus sanguinis*, *Tannerella* sp. oral taxon HOT-286, *Campylobacter showae*, *Gemella morbillorum*, *Neisseria mucosa*, *Aggregatibacter aphrophilus*, *Prevotella intermedia*, *Rothia dentocariosa*, *Streptococcus mutans*, *Aggregatibacter actinomycetemcomitans*, *Campylobacter rectus*, *Corynebacterium matruchotii*, *Fusobacterium nucleatum*, *Leptotrichia trevisanii*.

Of special note, the Human endogenous retrovirus K was detected (score of 8) in a Classical Amvrakia individual (Amv\_Epi\_CI\_1). HERV-K has been integrated in the human and cercopithecoid genomes [162].

Moreover, authenticated ancient DNA traces were obtained from environmental taxa, such as *Ralstonia solanacearum*, *Thermobispora bispora*, *Clostridium tetani*, *Streptosporangium roseum*, *Clostridium septicum*, *Candidatus Nitrososphaera gargensis*, *Alcaligenes faecalis*, *Proteus vulgaris*, *Acidipropionibacterium jensenii*, *Acinetobacter calcoaceticus*, *Advenella kashmirensis*, *Serratia rubidaea*, *Thermobispora bispora*, *Lysobacter gummosus*, *Frankia alni*, *Sanguibacter keddii*, *Clostridium butyricum*, *Citrobacter freundii*, *Citrobacter braakii*, *Streptomyces malaysiensis*, *Clostridium botulinum* and *Paeniclostridium sordellii*. Some of the above are considered pathogenic if found in human tissues, but since they are ubiquitous in soil, it is more parsimonious to assume that they do not originate from the sampled human individual.

Finally, there was a case that a human pathogen taxon (the tapeworm *Spirometra erinaceieuropaei*) was identified, although it is considered a false positive [163] due to its increased genetic similarity with specific areas in the human genome, despite showing aDNA

damage signatures. This increased similarity is suspected to be artificial due to the presence of contaminant (human) sequences in the parasite's reference genome [161].

### 3.8 Visualization

**Stefanos Papadantonakis, Angelos Souleles, Georgios Kousis Tsampazis, Angeliki Papadopoulou, Nikolaos Psonis**

The map of **Figure 1A** was created with R v.4.3.0 [164] using the packages *rnaturalearth* v.1.0.1.9000 [165], *sf* v.1.0-16 [166], *proj4* v1.0-13 [167], *ggplot2* [168] and *ggrepel* v.0.9.5 [169]. The mapache rulegraph (**Supplementary Figure S37**) was produced using *snakemake*. Plotting of ROHs (**Figure 5** and **Supplementary Figure S32**) and IBD (**Figure 3**) results was performed in Python v.3.8.1, using the *seaborn* v.0.12.1 [170] package. Plotting of PCA results (**Figure 2A**) was performed using R v.4.3.0 and the *ggplot2* and *ggmagnify* v.0.4.1.9000 [171] packages. Plotting of Pandora results was performed online using Flourish (<https://flourish.studio/>). Plotting of ADMIXTURE (**Figure 2B** and **Supplementary Figures S34-S35**), qpAdm (**Figure 4** and **Supplementary Figures S36-S38**) and f3 (**Supplementary Figures S39-S40**) results was performed in R v.4.3.2 using the *ggplot2* and *ggtext* v.0.1.2 [172] package. We merged multiple figures into a single one using Inkscape v.1.0.2-2 (<https://inkscape.org>).

## 4. Provenance, mobility and diet analysis using stable isotopes

*Argyro Nafplioti*

### 4.1 Strontium isotope ratio analysis of bioarchaeological skeletal remains: principles

The strontium isotope ratio ( $^{87}\text{Sr}/^{86}\text{Sr}$ ) largely reflects local geology. As strontium isotopes in teeth are fixed in enamel biogenic apatite at the time of tooth formation and enamel undergoes little remodeling thereafter, the strontium isotope ratio values recorded reflect childhood provenance and provide evidence for geographical origins and potentially also for mobility [173–175]. Since the principles of  $^{87}\text{Sr}/^{86}\text{Sr}$  analysis in research of this kind are well documented [175–177] and have also been extensively discussed in earlier relevant work of one of the authors [e.g. 178,179,180], we only provide a summary in the following.

In nature, strontium occurs in the form of four stable isotopes,  $^{87}\text{Sr}$  (comprises c. 7.04% of total strontium),  $^{88}\text{Sr}$  (c. 82.53%),  $^{86}\text{Sr}$  (c. 9.87%), and  $^{84}\text{Sr}$  (c. 0.56%). The strontium isotope  $^{87}\text{Sr}$  is radiogenic and is the product of the radioactive decay of the rubidium isotope  $^{87}\text{Rb}$ , which has a half-life of approximately 47 billion years. All remaining three strontium isotopes are non-radiogenic [181]. Therefore, in any geology, the ratio of strontium isotope  $^{87}\text{Sr}$  to  $^{86}\text{Sr}$  depends on the relative abundance of rubidium and strontium at the time the rock crystallized and the age of the rocks [182]. Because rubidium is substantially more abundant in crustal materials than in the Earth's mantle, old metamorphic rocks of crustal origin have higher  $^{87}\text{Sr}/^{86}\text{Sr}$  values (c. 0.715) than recent volcanic rocks (c. 0.704) [183]. Strontium isotope ratios in marine sedimentary rocks depend on the  $^{87}\text{Sr}/^{86}\text{Sr}$  value of seawater at the time they were formed and largely vary between 0.707 and 0.710 [184,185].

In essence, the  $^{87}\text{Sr}/^{86}\text{Sr}$  ratio largely reflects local geology, and passes from the bedrock into the soil, the groundwater, and the food chain. Thereby,  $^{87}\text{Sr}/^{86}\text{Sr}$  reaches the human skeletal tissues, where it substitutes for calcium in hydroxyapatite [181], largely from the food and water consumed with no fractionation related to biological processes [186,187]. Although other factors such as the proximity to marine environments and the  $^{87}\text{Sr}/^{86}\text{Sr}$  ratio in sea spray [188], atmospheric deposition [189] and in modern contexts fertilizers too [177,187], can also impact local  $^{87}\text{Sr}/^{86}\text{Sr}$  signatures, the latter largely reflect bedrock geology and mineral weathering. Thus,  $^{87}\text{Sr}/^{86}\text{Sr}$  signatures in human skeletal tissues match the geochemical profile of the catchment area of the individuals analyzed.

Because tooth enamel is a cell-free tissue that for most of the permanent dentition largely forms by the 8th year of life and does not remodel thereafter [174,190],  $^{87}\text{Sr}/^{86}\text{Sr}$  signatures from tooth enamel reflect early childhood diet and geographical origins. Conversely, bone and, to a lesser extent, also dentine, undergo continuous replacement of their mineral phase in the course of life. In addition, tooth enamel is denser, harder, and more inert than bone or dentine, and therefore more resistant to post-burial isotopic contamination than bone or dentine [173,191–194]. Thus, cortical bone  $^{87}\text{Sr}/^{86}\text{Sr}$  signatures more closely reflect the dietary intake of the last 10–20 years of life and human bone  $^{87}\text{Sr}/^{86}\text{Sr}$  values can be used to characterize local bioavailable  $^{87}\text{Sr}/^{86}\text{Sr}$  at one's site of residence prior to death [180,195–199].



Acknowledging the possibility of recent immigrants among the tested individuals, samples from archaeological animal skeletal tissues offer a more reliable measure of the local bioavailable  $^{87}\text{Sr}/^{86}\text{Sr}$  compared to bone signatures. They provide an average of the bioavailable  $^{87}\text{Sr}/^{86}\text{Sr}$  signatures of the feeding territories that these animals occupied and are thereby widely accepted as an accurate measure for the local  $^{87}\text{Sr}/^{86}\text{Sr}$  value range in soils, plants, animals, and waters [175,183]. In principle, if an individual was born and raised in the local area, the  $^{87}\text{Sr}/^{86}\text{Sr}$  values measured from his/her tooth enamel should be similar to his/her bone  $^{87}\text{Sr}/^{86}\text{Sr}$  and also to the local bioavailable  $^{87}\text{Sr}/^{86}\text{Sr}$  signatures. They will also be in overall agreement with comparable data from local geological material(s) and archaeological animal skeletal tissues. Otherwise, if human tooth enamel  $^{87}\text{Sr}/^{86}\text{Sr}$  signatures are found to be statistically significantly different from the local  $^{87}\text{Sr}/^{86}\text{Sr}$ , we may infer that the respective people spent their childhood at (a) location(s) that are geologically and isotopically different from their residence prior to death. For the reasons outlined above, in this paper in addition to information on the local geology we discuss  $^{87}\text{Sr}/^{86}\text{Sr}$  data from archaeological animals and human  $^{87}\text{Sr}/^{86}\text{Sr}$  tooth enamel signatures from Corinth and the region of Corinthia in order to track potential residential mobility using the  $^{87}\text{Sr}/^{86}\text{Sr}$  methodology.

## 4.2 Geological context of the study area

Epirus comprises most of the mainland of north-west Greece and largely falls within the Ionian and Gavrovo isotopic/tectonic zones, while its basement comprises nappes that represent rocks of several different environments, stacked up on top of each other during the Alpine compression [200]. The Gavrovo zone was a continental fragment for the early part of its history, where the Mesozoic shallow-water limestones were later almost completely covered by late Eocene flysch sediments [200]. In Epirus, the Gavrovo zone crops out in a narrow belt west of the Pindos zone, and its oldest rocks are limestone [200]. Further west, the Ionian zone, a deep-water trough, crops out throughout much of the western part of this region and largely consists of deep-water limestones. The site of Amvrakia in particular, is set on hard limestone, but there also exist outcrops of flysch, as well as alluvium and recent deposits in the immediate proximity to the site, at a distance below 5 km (**Supplementary Figure S40**).

The archaeological site of Amvrakia on the north-east coast of the Gulf of Arta is set on a narrow strip of limestone/s [200]. Less than 2 km further west and south of the site extend alluvial deposits, while for a small part to its east and further south these rocks are interrupted by outcrops of flysch. The site of Amvrakia and its immediate periphery are thus characterized by high geological variability.

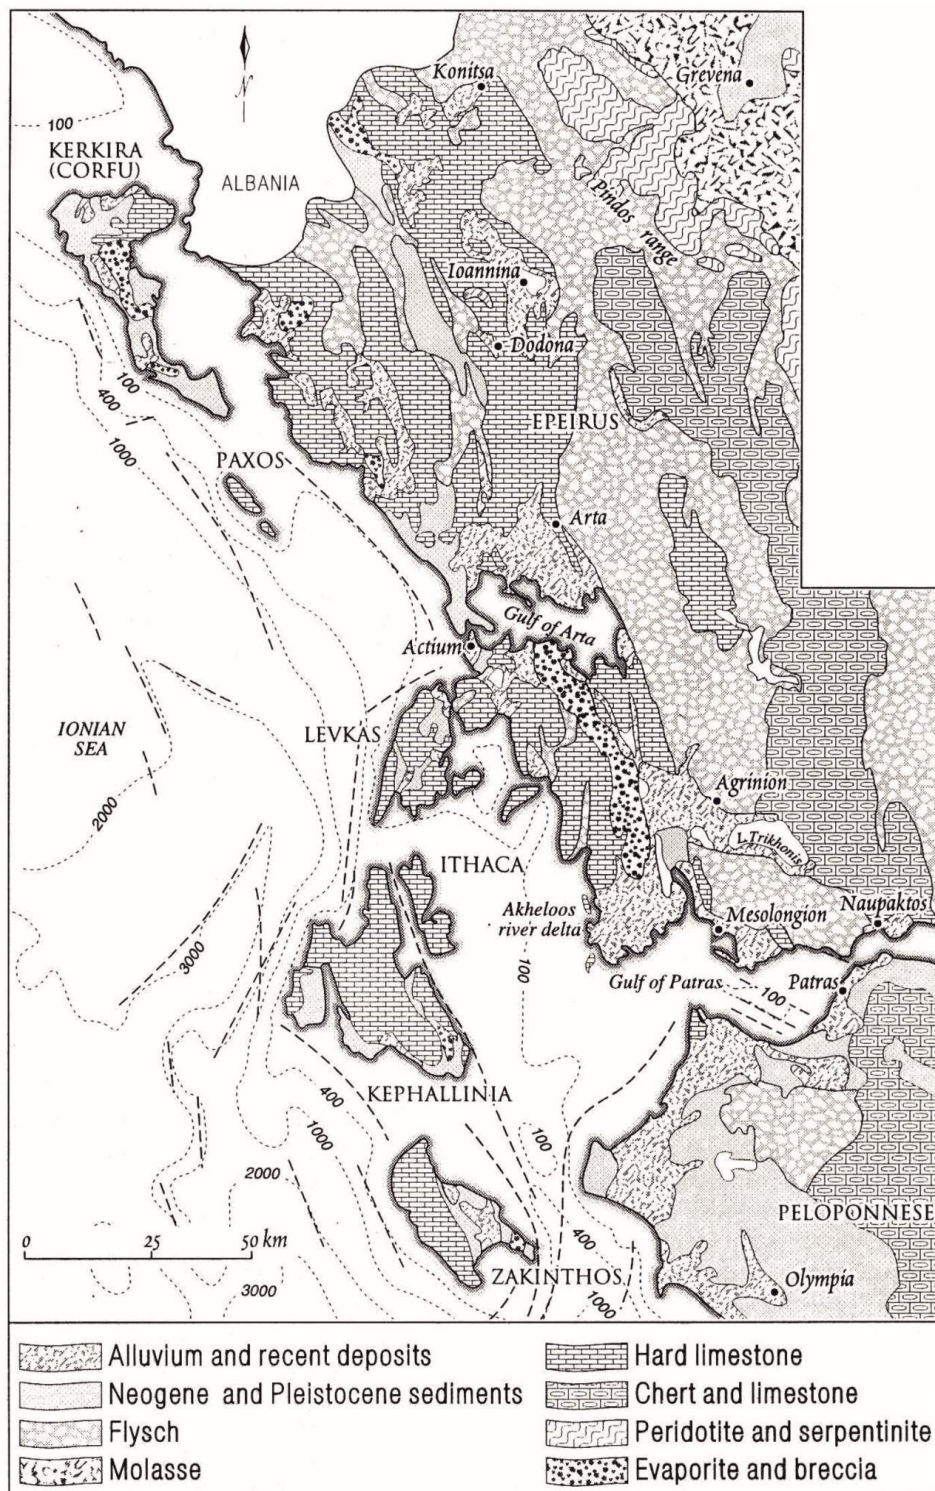

**Supplementary Figure S40.** Geological map of Ambrakia (Arta) and the broader region of Epirus. After [201].

## 2209 4.3 Materials and Methods

### 2210 4.3.1 Samples

2211 Strontium isotope ratios were measured from tooth enamel samples from 14 human  
2212 burials of Amvrakia. Eight of them were dated to the Archaic and the remaining six to the  
2213 Classical period. Three of these burials were also analyzed for the corresponding  $^{87}\text{Sr}/^{86}\text{Sr}$   
2214 signatures in tooth dentine samples. All human teeth sampled had previously been studied  
2215 macroscopically. All human teeth were found attached to the associated maxillary/mandibular  
2216 bone. There were seven M1s, five M2s, as well as one incisor and one canine. Relevant  
2217 information is included in **Additional Table A2**.

### 2218 4.3.2 Sample preparation and analysis

#### 2219 Strontium isotope ratio analysis

2220 The analytical protocol for  $^{87}\text{Sr}/^{86}\text{Sr}$  analysis, including sample extraction and  
2221 preparation prior to analysis, have been detailed in earlier publications [179,180]. Tooth  
2222 enamel samples (> 20mg) were placed in an ultrasonic bath for a total of 30 minutes to remove  
2223 surface contamination. The bath was interrupted every 10 minutes and the specimens were  
2224 mechanically cleaned using distilled water. In order to remove diagenetic strontium, tooth  
2225 enamel samples were leached in 2 ml of 5% acetic acid. All samples were rinsed in ultrapure  
2226 water (four times) after the first hour of bathing in acetic acid and then placed back in fresh  
2227 5% and 2% acetic acid, respectively, and left overnight.

2228 On the following day, samples were rinsed four times and dried in an oven ( $\leq 50^\circ\text{C}$ ). All  
2229 leachates were retained. Strontium columns were prepared by filling small Teflon columns up  
2230 to the neck with cleaned Sr resin. The columns were cleaned with 3 ml  $\text{H}_2\text{O}$  and 3 ml of SB  
2231 3M  $\text{HNO}_3$ . The matrix and everything except Sr and Rb was eluted with 2.5 ml of SB 3M  $\text{HNO}_3$ .  
2232 Sr was collected by passing ultrapure water and dried down on a hotplate. The Sr fractions  
2233 were loaded onto single tantalum filaments with Ta-activator and the  $^{87}\text{Sr}/^{86}\text{Sr}$  values were  
2234 measured to the sixth decimal digit with a ThermoFisher TRITON Plus Thermal Ionization  
2235 Mass Spectrometer (7 Collectors). Preparation of the samples was carried out at the  
2236 Department of Biology, University of Crete, while sample chemical analysis and measurement  
2237 of the associated signatures were performed at the National Oceanography Centre in  
2238 Southampton (NOCS).

## 2239 4.4 Results and Discussion

2240 Strontium isotope ratio ( $^{87}\text{Sr}/^{86}\text{Sr}$ ) signatures from human tooth enamel from the 14  
2241 burials analyzed follow a broad distribution and range between 0.70808 and 0.70890. The  
2242 results are largely consistent with consumption of regional livestock and agricultural products  
2243 from the area of influence of the city of Amvrakia. In four of the examined cases, however, the  
2244 human tooth enamel  $^{87}\text{Sr}/^{86}\text{Sr}$  signatures (0.70859 to 0.70890) are similar to comparable data  
2245 from human burials in Ancient Corinth (0.70848 to 0.70882) [202] and also to bioavailable data  
2246 from the Corinthia region (0.70865 to 0.70869) [178,179]. These data are thereby compatible  
2247 with an origin from Corinth for the respective individuals and add support to the archaeological  
2248 theory of the Corinthian colonization of ancient Amvrakia.

2249

2250 **Additional Table A2.** Strontium isotope ratio (<sup>87</sup>Sr/<sup>86</sup>Sr) signatures from human tooth enamel  
 2251 from the 14 burials analyzed in the present study and related burial metadata.

| Isotope ID | Context                     | Element and tissue                 | Date      |
|------------|-----------------------------|------------------------------------|-----------|
| AN14       | LXXXVI B, AMV 30, ID164     | Tooth enamel, molar 1, upper right | Classical |
| AN187      | CCCLX, ID142                | Tooth enamel, molar 2, lower right | Archaic   |
| AN15       | CCLXI, ID210                | Tooth enamel, molar 1, lower left  | Archaic   |
| AN13       | CCLXIV, ID102               | Tooth enamel, molar 1, lower right | Classical |
| AN186      | CXI, ID26                   | Tooth enamel, molar 2, lower       | Classical |
| AN11       | CXXVI 2, ID51               | Tooth enamel, molar 1, upper left  | Archaic   |
| AN189*     | CXXVI, ID1                  | Tooth enamel, molar 1, lower right | Classical |
| AN178      | T9, CCCLXXXVIII, ID13       | Tooth enamel, canine               | Archaic   |
| AN185**    | T9, CCCXXXIX Burial 2, ID11 | Tooth enamel, molar 2, upper       | Archaic   |
| AN183      | T9, CCL Burial 2, ID171     | Tooth enamel, molar 2, upper       | Classical |
| AN184      | T9, CCXCV, ID24             | Tooth enamel, incisor 1            | Archaic   |
| AN182      | T9, CXXXIV                  | Tooth enamel, molar 2, upper       | Classical |
| AN180      | T9, C                       | Tooth enamel, molar 1, upper       | Archaic   |
| AN181      | T9, CVII                    | Tooth enamel, molar 1, lower       | Archaic   |

2252

## 2253 5. Supplementary Information References

- 2254 1. Dillon M, Dillion M, Garland L. Ancient Greece: Social and Historical Documents from  
2255 Archaic Times to the Death of Alexander the Great . Routledge; 2010. Available from:  
2256 <https://play.google.com/store/books/details?id=ohYWBAQAQBAJ>
- 2257 2. Hansen MH, Nielsen TH. An Inventory of Archaic and Classical Poleis . OUP Oxford; 2004.  
2258 Available from: <https://play.google.com/store/books/details?id=9QZREAAAQBAJ>
- 2259 3. Graham AJ. Colony and Mother City in Ancient Greece . Manchester University Press;  
2260 1999. Available from:  
2261 [https://books.google.com/books/about/Colony\\_and\\_Mother\\_City\\_in\\_Ancient\\_Greece.html?hl=](https://books.google.com/books/about/Colony_and_Mother_City_in_Ancient_Greece.html?hl=&id=z6XnAAAAIAAJ)  
2262 [=&id=z6XnAAAAIAAJ](https://books.google.com/books/about/Colony_and_Mother_City_in_Ancient_Greece.html?hl=&id=z6XnAAAAIAAJ)
- 2263 4. Ridgway D. The First Western Greeks . CUP Archive; 1992. Available from:  
2264 [https://books.google.com/books/about/The\\_First\\_Western\\_Greeks.html?hl=&id=9F44AAAAIAAJ](https://books.google.com/books/about/The_First_Western_Greeks.html?hl=&id=9F44AAAAIAAJ)  
2265 AAJ
- 2266 5. Grammenos DV, Petropoulos EK. Ancient Greek Colonies in the Black Sea . Thessaloniki:  
2267 Archaeological Institute of Northern Greece; 2003. Available from:  
2268 [https://books.google.com/books/about/Ancient\\_Greek\\_Colonies\\_in\\_the\\_Black\\_Sea.html?hl=](https://books.google.com/books/about/Ancient_Greek_Colonies_in_the_Black_Sea.html?hl=&id=UtdoAAAAMAAJ)  
2269 [&id=UtdoAAAAMAAJ](https://books.google.com/books/about/Ancient_Greek_Colonies_in_the_Black_Sea.html?hl=&id=UtdoAAAAMAAJ)
- 2270 6. Tsatskheladze GR. Greek Colonisation: An Account of Greek Colonies and Other  
2271 Settlements Overseas . Leiden, Boston, and Köln: Brill; 2008. Available from:  
2272 [https://books.google.com/books/about/Greek\\_Colonisation.html?hl=&id=PIgTAQAIAAJ](https://books.google.com/books/about/Greek_Colonisation.html?hl=&id=PIgTAQAIAAJ)
- 2273 7. Petropoulos EK. Problems in the history and archaeology of the Greek colonization of the  
2274 Black Sea. In: Grammenos DV, Petropoulos EK, editors. Ancient Greek Colonies in the Black  
2275 Sea . 2003 [cited 2024 Jul 18]. p. 17–92. Available from:  
2276 [https://www.academia.edu/32112108/ANCIENT\\_GREEK\\_COLONIES\\_IN\\_THE\\_BLACK\\_SEA\\_2\\_Grammenos\\_D\\_V\\_and\\_E\\_K\\_Petropoulos\\_eds\\_British\\_Archaeological\\_Reports\\_International\\_Series\\_1679\\_Oxford\\_2007](https://www.academia.edu/32112108/ANCIENT_GREEK_COLONIES_IN_THE_BLACK_SEA_2_Grammenos_D_V_and_E_K_Petropoulos_eds_British_Archaeological_Reports_International_Series_1679_Oxford_2007)
- 2277 A\_2\_Grammenos\_D\_V\_and\_E\_K\_Petropoulos\_eds\_British\_Archaeological\_Reports\_International\_Series\_1679\_Oxford\_2007
- 2278
- 2279 8. Petropoulos EK. Hellenic Colonization in Euxine Pontos: Penetration, Early  
2280 Establishment, and the Problem of the “emporion” Revisited . British Archaeological Reports  
2281 Oxford Limited; 2005. Available from:  
2282 [https://books.google.com/books/about/Hellenic\\_Colonization\\_in\\_Euxine\\_Pontos.html?hl=](https://books.google.com/books/about/Hellenic_Colonization_in_Euxine_Pontos.html?hl=&id=0jBmAAAAMAAJ)  
2283 [&id=0jBmAAAAMAAJ](https://books.google.com/books/about/Hellenic_Colonization_in_Euxine_Pontos.html?hl=&id=0jBmAAAAMAAJ)
- 2284 9. van Dommelen P. Colonialism and Migration in the Ancient Mediterranean. Annu Rev  
2285 Anthropol . 2012 [cited 2024 Apr 9];41:393–409. Available from:  
2286 <https://www.annualreviews.org/content/journals/10.1146/annurev-anthro-081309-145758>
- 2287 10. Malkin I. A Small Greek World: Networks in the Ancient Mediterranean . OUP USA; 2011.  
2288 Available from:  
2289 [https://books.google.com/books/about/A\\_Small\\_Greek\\_World.html?hl=&id=CKQXm8sNgNkC](https://books.google.com/books/about/A_Small_Greek_World.html?hl=&id=CKQXm8sNgNkC)  
2290 C
- 2291 11. Osborne R. Greece in the Making 1200-479 BC . Routledge; 2009. Available from:  
2292 [https://books.google.com/books/about/Greece\\_in\\_the\\_Making\\_1200\\_479\\_BC.html?hl=&id=6WO7-Goh28IC](https://books.google.com/books/about/Greece_in_the_Making_1200_479_BC.html?hl=&id=6WO7-Goh28IC)  
2293 6WO7-Goh28IC
- 2294 12. Malkin I. Foundations. A Companion to Archaic Greece . John Wiley & Sons, Ltd; 2009  
2295 [cited 2024 Jul 18]. p. 373–94. Available from:

- 2296 <https://onlinelibrary.wiley.com/doi/abs/10.1002/9781444308761.ch19>
- 2297 13. Hornblower S. Thucydides and “Chalkidic” Torone (IV.110.1). *Oxford Journal of*  
 2298 *Archaeology* . 1997 [cited 2024 Jul 18];16:177–86. Available from:  
 2299 <https://onlinelibrary.wiley.com/doi/abs/10.1111/1468-0092.00033>
- 2300 14. Papadopoulos JK. Archaeology, Myth-History and the Tyranny of the Text: Chaldike,  
 2301 Torone and Thucydides. *Oxford Journal of Archaeology* . 1999 [cited 2024 Jul 18];18:377–94.  
 2302 Available from: <https://onlinelibrary.wiley.com/doi/abs/10.1111/1468-0092.00091>
- 2303 15. Graham AJ. COMMERCIAL INTERCHANGES BETWEEN GREEKS AND NATIVES.  
 2304 *Collected Papers on Greek Colonization* . Brill; 2001 [cited 2024 Apr 17]. p. 45–56. Available  
 2305 from: <https://brill.com/display/book/9789004351066/B9789004351066-s004.xml>
- 2306 16. Boardman J. The Greeks Overseas: Their Early Colonies and Trade . Thames and  
 2307 Hudson; 1999. Available from:  
 2308 <https://play.google.com/store/books/details?id=EqHAQgAACAAJ>
- 2309 17. Reitsema LJ, Kyle B, Vassallo S. Food traditions and colonial interactions in the ancient  
 2310 Mediterranean: Stable isotope evidence from the Greek Sicilian colony Himera. *Journal of*  
 2311 *Anthropological Archaeology* . 2020;57:101144. Available from:  
 2312 <https://www.sciencedirect.com/science/article/pii/S0278416519301734>
- 2313 18. Kaponis A. (In Greek) The Corinthian colonies around the Amvrakiko gulf from their  
 2314 foundation to the time of Philip II. 2020 [cited 2024 Jul 18]; Available from:  
 2315 <https://pergamos.lib.uoa.gr/uoa/dl/object/2897438>
- 2316 19. Keenleyside A. Dental pathology and diet at Apollonia, a Greek colony on the Black Sea.  
 2317 *International Journal of Osteoarchaeology* . 2008 [cited 2024 Jul 18];18:262–79. Available  
 2318 from: <https://onlinelibrary.wiley.com/doi/abs/10.1002/oa.934>
- 2319 20. Hammond N. The classical age of Greece . Harper & Row Publishers, Inc. USA; 1975.  
 2320 Available from: <https://cir.nii.ac.jp/crid/1130000797935601664>
- 2321 21. Graham AJ. Patterns in Early Greek Colonisation. *J Hell Stud* . 1971 [cited 2024 Apr  
 2322 19];91:35–47. Available from: [https://www.cambridge.org/core/journals/journal-of-hellenic-](https://www.cambridge.org/core/journals/journal-of-hellenic-studies/article/patterns-in-early-greek-colonisation/C5ECC7999BD671BDB82FC553D4DE3AB6)  
 2323 [studies/article/patterns-in-early-greek-](https://www.cambridge.org/core/journals/journal-of-hellenic-studies/article/patterns-in-early-greek-colonisation/C5ECC7999BD671BDB82FC553D4DE3AB6)  
 2324 [colonisation/C5ECC7999BD671BDB82FC553D4DE3AB6](https://www.cambridge.org/core/journals/journal-of-hellenic-studies/article/patterns-in-early-greek-colonisation/C5ECC7999BD671BDB82FC553D4DE3AB6)
- 2325 22. Strabo. Geography, Volume III: Books 6-7. Translated by Horace Leonard Jones. Loeb  
 2326 Classical Library 182. Cambridge . Harvard University Press; 1924. Available from:  
 2327 <https://play.google.com/store/books/details?id=n4RiAAAAMAAJ>
- 2328 23. Wilkes J. GREEKS AND ILLYRIANS IN THE GREEK-LANGUAGE INSCRIPTIONS FROM  
 2329 EPIDAMNUS-DYRRHACIUM AND FROM APOLLONIA IN ILYRIA-PROCEEDINGS OF THE  
 2330 INTERNATIONAL ROUNDTABLE (CLERMONT-FERRAND, OCTOBER 19-21, 1989)-  
 2331 FRENCH-CABANES, P. SOC PROMOTION HELLENIC STUD 31-34 GORDON SQ,  
 2332 LONDON, UNITED KINGDOM WC1H 0PP; 1995.
- 2333 24. White ME. Greek Colonization. *J Econ Hist* . 1961;21:443–54. Available from:  
 2334 <http://www.jstor.org/stable/2114410>
- 2335 25. Zhestokanov SM. The Corinth-Corcyra conflict of the seventh century BC. *Saalburg Jahrb*  
 2336 . 2020;26:15–23. Available from: [http://saa.uaic.ro/the-corinth-corcyra-conflict-of-the-seventh-](http://saa.uaic.ro/the-corinth-corcyra-conflict-of-the-seventh-century-bc/)  
 2337 [century-bc/](http://saa.uaic.ro/the-corinth-corcyra-conflict-of-the-seventh-century-bc/)

- 2338 26. Papadopoulou V. RES GESTAE. The work of the Ephorate of Antiquities of Arta during  
 2339 the years 2014 – 2020, Arta 2020 / RES GESTAE. Τα Πεπραγμένα της Εφορείας Αρχαιοτήτων  
 2340 Άρτας κατά τα έτη 2014 – 2020, Άρτα 2020. 2020 [cited 2024 Jul 18]; Available from:  
 2341 [https://www.academia.edu/51173824/RES\\_GESTAE\\_The\\_work\\_of\\_the\\_Ephorate\\_of\\_Antiquities\\_of\\_Arta\\_during\\_the\\_years\\_2014\\_2020\\_Arta\\_2020\\_RES\\_GESTAE\\_%CE%A4%CE%B1\\_%CE%A0%CE%B5%CF%80%CF%81%CE%B1%CE%B3%CE%BC%CE%AD%CE%BD%CE%B1\\_%CF%84%CE%B7%CF%82\\_%CE%95%CF%86%CE%BF%CF%81%CE%B5%CE%AF%CE%B1%CF%82\\_%CE%91%CF%81%CF%87%CE%B1%CE%B9%CE%BF%CF%84%CE%AE%CF%84%CF%89%CE%BD\\_%CE%86%CF%81%CF%84%CE%B1%CF%82\\_%CE%BA%CE%B1%CF%84%CE%AC\\_%CF%84%CE%B1\\_%CE%AD%CF%84%CE%B7\\_2014\\_2020\\_%CE%86%CF%81%CF%84%CE%B1\\_2020](https://www.academia.edu/51173824/RES_GESTAE_The_work_of_the_Ephorate_of_Antiquities_of_Arta_during_the_years_2014_2020_Arta_2020_RES_GESTAE_%CE%A4%CE%B1_%CE%A0%CE%B5%CF%80%CF%81%CE%B1%CE%B3%CE%BC%CE%AD%CE%BD%CE%B1_%CF%84%CE%B7%CF%82_%CE%95%CF%86%CE%BF%CF%81%CE%B5%CE%AF%CE%B1%CF%82_%CE%91%CF%81%CF%87%CE%B1%CE%B9%CE%BF%CF%84%CE%AE%CF%84%CF%89%CE%BD_%CE%86%CF%81%CF%84%CE%B1%CF%82_%CE%BA%CE%B1%CF%84%CE%AC_%CF%84%CE%B1_%CE%AD%CF%84%CE%B7_2014_2020_%CE%86%CF%81%CF%84%CE%B1_2020)  
 2348
- 2349 27. Aggeli A. (In Greek) The burial precincts of Amvrakia, in: K. Sporn (ed.), Griechische  
 2350 Grabbezirke klassischer Zeit, Athenaia 6, 2013. 2013 [cited 2024 Jul 18]; Available from:  
 2351 [https://www.academia.edu/19964480/%CE%9F%CE%B9\\_%CF%84%CE%B1%CF%86%CE%B9%CE%BA%CE%BF%CE%AF\\_%CF%80%CE%B5%CF%81%CE%AF%CE%B2%CE%BF%CE%BB%CE%BF%CE%B9\\_%CF%84%CE%B7%CF%82\\_%CE%91%CE%BC%CE%B2%CF%81%CE%B1%CE%BA%CE%AF%CE%B1%CF%82\\_in\\_K\\_Sporn\\_ed\\_Griechische\\_Grabbezirke\\_klassischer\\_Zeit\\_Athenaia\\_6\\_2013](https://www.academia.edu/19964480/%CE%9F%CE%B9_%CF%84%CE%B1%CF%86%CE%B9%CE%BA%CE%BF%CE%AF_%CF%80%CE%B5%CF%81%CE%AF%CE%B2%CE%BF%CE%BB%CE%BF%CE%B9_%CF%84%CE%B7%CF%82_%CE%91%CE%BC%CE%B2%CF%81%CE%B1%CE%BA%CE%AF%CE%B1%CF%82_in_K_Sporn_ed_Griechische_Grabbezirke_klassischer_Zeit_Athenaia_6_2013)  
 2355
- 2356 28. Tzouvara-Souli H. (In Greek) Amvrakia. Artis Musicological Association "O Skoufas"; 1992  
 2357 [cited 2024 Jul 18]. Available from:  
 2358 <https://books.google.com/books/about/%CE%91%CE%BC%CE%B2%CF%81%CE%B1%CE%BA%CE%AF%CE%B1.html?hl=el&id=bJxMAAAAYAAJ>  
 2359
- 2360 29. Andreou-Psychogiou I. Ambracie, une ville ancienne se reconstitue peu à peu par les  
 2361 recherches .1993 . [cited 2024 Aug 26]. Available from:  
 2362 <https://zenon.dainst.org/Record/001019928>
- 2363 30. Robinson EW. The First Democracies: Early Popular Government Outside Athens .  
 2364 Stuttgart: F. Steiner; 1997 [cited 2024 Jul 18]. p. 80–2. Available from:  
 2365 [https://books.google.com/books/about/The\\_First\\_Democracies.html?hl=el&id=T1kfcobFRSMC](https://books.google.com/books/about/The_First_Democracies.html?hl=el&id=T1kfcobFRSMC)  
 2366
- 2367 31. Chrysos EK. Nicopolis I: Proceedings of the First International Symposium on Nicopolis  
 2368 (23-29 September 1984) . Actia Nicopolis Foundation; 1987 [cited 2024 Jul 18]. Available from:  
 2369 [https://books.google.com/books/about/Nicopolis\\_I.html?hl=el&id=-hHVmQEACAAJ](https://books.google.com/books/about/Nicopolis_I.html?hl=el&id=-hHVmQEACAAJ)
- 2370 32. Kordosis M. Ancient and Early Byzantine Tenea. Dodone . 1997 [cited 2024 Jul  
 2371 18];26:465–580. Available from:  
 2372 <http://dx.doi.org/https://olympias.lib.uoi.gr/jspui/handle/123456789/6127>  
 2373 <http://dx.doi.org/10.26268/heal.uoi.9267>
- 2374 33. Wiseman J. Corinth and Rome I: 228 B.C.—A.D. 267. Band 7/1 Halbband Politische  
 2375 Geschichte (Provinzen und Randvölker: Griechischer Balkanraum; Kleinasien) . De Gruyter;  
 2376 2016 [cited 2024 Aug 28]. p. 438–548. Available from:  
 2377 <https://www.degruyter.com/document/doi/10.1515/9783110837612-009/html>
- 2378 34. Tenea Project, Elena K, Lagos C. Korka, E. & Lagos, C. (2019), Numismatic Grave Finds  
 2379 of the Tenea-Chiliomodi Excavation Project 2013-2017. The Journal of Archaeological  
 2380 Numismatics, Volume 9, pp 349-362 . 2019 [cited 2024 Aug 1]; Available from:  
 2381 [https://www.academia.edu/42952562/Korka\\_E\\_and\\_Lagos\\_C\\_2019\\_Numismatic\\_Grave\\_Finds\\_of\\_the\\_Tenea\\_Chiliomodi\\_Excavation\\_Project\\_2013\\_2017](https://www.academia.edu/42952562/Korka_E_and_Lagos_C_2019_Numismatic_Grave_Finds_of_the_Tenea_Chiliomodi_Excavation_Project_2013_2017)  
 2382
- 2383 35. Korka E, Evaggeloglou P, Panailidis P, Christidis I. Systematic excavation of Ancient  
 2384 Tenea: A journey from the past to the present with an eye to the future. The partnership



- [illegible]

- 2434 E%B9%CE%BD%CE%AD%CE%BB%CE%BB%CE%B7\_%CE%97\_%CE%95%CF%80%C  
 2435 E%B9%CF%83%CF%84%CE%B7%CE%BC%CE%BF%CE%BD%CE%B9%CE%BA%CE  
 2436 %AE\_%CE%A3%CF%85%CE%BD%CE%AC%CE%BD%CF%84%CE%B7%CF%83%CE  
 2437 %B7\_%CE%B3%CE%B9%CE%B1\_%CF%84%CE%B7%CE%BD\_%CE%95%CE%BB%C  
 2438 E%BB%CE%B7%CE%BD%CE%B9%CF%83%CF%84%CE%B9%CE%BA%CE%AE\_%CE  
 2439 %9A%CE%B5%CF%81%CE%B1%CE%BC%CE%B9%CE%BA%CE%AE\_%CE%99%CF%  
 2440 89%CE%AC%CE%BD%CE%BD%CE%B9%CE%BD%CE%B1\_5\_9\_%CE%9C%CE%B1%  
 2441 E1%BF%92%CE%BF%CF%85\_2009\_%CE%91%CE%B8%CE%AE%CE%BD%CE%B1\_2  
 2442 014
- 2443 43. Katsadima I. (In Greek) Epitaphic columns from Ambrakia. University of Ioannina. Faculty  
 2444 of Philosophy. Department of History and Archaeology; 2003 [cited 2024 Jul 18]. Available  
 2445 from: <http://hdl.handle.net/10442/hedi/17630>
- 2446 44. Vasileiou E. Neolithic and Bronze Age Epirus revisited, *Archaeology in Greece* 2019–2020  
 2447 (2019-2020). *Archaeological Reports* . 2020;66:67–81. Available from:  
 2448 <https://www.jstor.org/stable/27098049>
- 2449 45. Raptopoulos S, Baladima A. ΑΝΔΡΟΜΑΧΗ ΜΠΑΛΑΔΗΜΑ, ΣΩΤΗΡΙΟΣ ΡΑΠΤΟΠΟΥΛΟΣ,  
 2450 ΙΩΑΝΝΗΣ ΚΩΤΣΟΚΩΣΤΑΣ, Χρονικά Α.Δ. 71, 2016 (Άρτα). Χρονικά . 2016 [cited 2024 Jul  
 2451 18];71. Available from:  
 2452 [https://www.academia.edu/95794876/%CE%91%CE%9D%CE%94%CE%A1%CE%9F%CE%9C%CE%91%CE%A7%CE%97\\_%CE%9C%CE%A0%CE%91%CE%9B%CE%91%CE%94%CE%97%CE%9C%CE%91\\_%CE%A3%CE%A9%CE%A4%CE%97%CE%A1%CE%99%CE%9F%CE%A3\\_%CE%A1%CE%91%CE%A0%CE%A4%CE%9F%CE%A0%CE%9F%CE%A5%CE%9B%CE%9F%CE%A3\\_%CE%99%CE%A9%CE%91%CE%9D%CE%9D%CE%97%CE%A3\\_%CE%9A%CE%A9%CE%A4%CE%A3%CE%9F%CE%9A%CE%A9%CE%A3%CE%A4%CE%91%CE%A3\\_%CE%A7%CF%81%CE%BF%CE%BD%CE%B9%CE%BA%CE%AC\\_%CE%91\\_%CE%94\\_71\\_2016\\_%CE%86%CF%81%CF%84%CE%B1\\_](https://www.academia.edu/95794876/%CE%91%CE%9D%CE%94%CE%A1%CE%9F%CE%9C%CE%91%CE%A7%CE%97_%CE%9C%CE%A0%CE%91%CE%9B%CE%91%CE%94%CE%97%CE%9C%CE%91_%CE%A3%CE%A9%CE%A4%CE%97%CE%A1%CE%99%CE%9F%CE%A3_%CE%A1%CE%91%CE%A0%CE%A4%CE%9F%CE%A0%CE%9F%CE%A5%CE%9B%CE%9F%CE%A3_%CE%99%CE%A9%CE%91%CE%9D%CE%9D%CE%97%CE%A3_%CE%9A%CE%A9%CE%A4%CE%A3%CE%9F%CE%9A%CE%A9%CE%A3%CE%A4%CE%91%CE%A3_%CE%A7%CF%81%CE%BF%CE%BD%CE%B9%CE%BA%CE%AC_%CE%91_%CE%94_71_2016_%CE%86%CF%81%CF%84%CE%B1_)  
 2459
- 2460 46. Vokotopoulou I. (In Greek) Vitsa: the cemeteries of a Molossian count. *Archaeological*  
 2461 *Resources and Expropriations Fund*; 1986 [cited 2024 Jul 18]. Available from:  
 2462 [https://books.google.com/books/about/%CE%92%CE%AF%CF%84%CF%83%CE%B1.html](https://books.google.com/books/about/%CE%92%CE%AF%CF%84%CF%83%CE%B1.html?hl=el&id=x0_6zQEACAAJ)  
 2463 [?hl=el&id=x0\\_6zQEACAAJ](https://books.google.com/books/about/%CE%92%CE%AF%CF%84%CF%83%CE%B1.html?hl=el&id=x0_6zQEACAAJ)
- 2464 47. Ramsey CB. Bayesian Analysis of Radiocarbon Dates. *Radiocarbon* . 2009 [cited 2025  
 2465 Jul 25];51:337–60. Available from: [https://www.cambridge.org/core/services/aop-cambridge-](https://www.cambridge.org/core/services/aop-cambridge-core/content/view/F622173B70F9C1597F2738DEFC597114/S0033822200033865a.pdf/div-class-title-bayesian-analysis-of-radiocarbon-dates-div.pdf)  
 2466 [core/content/view/F622173B70F9C1597F2738DEFC597114/S0033822200033865a.pdf/div-](https://www.cambridge.org/core/services/aop-cambridge-core/content/view/F622173B70F9C1597F2738DEFC597114/S0033822200033865a.pdf/div-class-title-bayesian-analysis-of-radiocarbon-dates-div.pdf)  
 2467 [class-title-bayesian-analysis-of-radiocarbon-dates-div.pdf](https://www.cambridge.org/core/services/aop-cambridge-core/content/view/F622173B70F9C1597F2738DEFC597114/S0033822200033865a.pdf/div-class-title-bayesian-analysis-of-radiocarbon-dates-div.pdf)
- 2468 48. Reimer PJ, Austin WEN, Bard E, Bayliss A, Blackwell PG, Ramsey CB, et al. The IntCal20  
 2469 Northern Hemisphere Radiocarbon Age Calibration Curve (0–55 cal kBP). *Radiocarbon* . 2020  
 2470 [cited 2025 Jul 25];62:725–57. Available from: [https://www.cambridge.org/core/services/aop-](https://www.cambridge.org/core/services/aop-cambridge-core/content/view/83257B63DC3AF9CFA6243F59D7503EFF/S0033822220000417a.pdf/div-class-title-the-intcal20-northern-hemisphere-radiocarbon-age-calibration-curve-0-55-cal-kbp-div.pdf)  
 2471 [cambridge-](https://www.cambridge.org/core/services/aop-cambridge-core/content/view/83257B63DC3AF9CFA6243F59D7503EFF/S0033822220000417a.pdf/div-class-title-the-intcal20-northern-hemisphere-radiocarbon-age-calibration-curve-0-55-cal-kbp-div.pdf)  
 2472 [core/content/view/83257B63DC3AF9CFA6243F59D7503EFF/S0033822220000417a.pdf/div](https://www.cambridge.org/core/services/aop-cambridge-core/content/view/83257B63DC3AF9CFA6243F59D7503EFF/S0033822220000417a.pdf/div-class-title-the-intcal20-northern-hemisphere-radiocarbon-age-calibration-curve-0-55-cal-kbp-div.pdf)  
 2473 [-class-title-the-intcal20-northern-hemisphere-radiocarbon-age-calibration-curve-0-55-cal-](https://www.cambridge.org/core/services/aop-cambridge-core/content/view/83257B63DC3AF9CFA6243F59D7503EFF/S0033822220000417a.pdf/div-class-title-the-intcal20-northern-hemisphere-radiocarbon-age-calibration-curve-0-55-cal-kbp-div.pdf)  
 2474 [kbp-div.pdf](https://www.cambridge.org/core/services/aop-cambridge-core/content/view/83257B63DC3AF9CFA6243F59D7503EFF/S0033822220000417a.pdf/div-class-title-the-intcal20-northern-hemisphere-radiocarbon-age-calibration-curve-0-55-cal-kbp-div.pdf)
- 2475 49. Korka E, Agelarakis A. (In Greek) New evidence on the early written sarcophagus of  
 2476 Phaneromenes Chiliomodios. The archaeological project in peloponnese (AEPEL1),  
 2477 Proceedings of the Tripoli International Conference (November 7-11, 2012). 2018;627–34.  
 2478 Available from:  
 2479 [https://www.researchgate.net/publication/329759926\\_Nea\\_stoicheia\\_peri\\_tes\\_porines\\_grapt](https://www.researchgate.net/publication/329759926_Nea_stoicheia_peri_tes_porines_grapt_es_sarkophagou_Phaneromenes_Chiliomodiou_Korka_E_kai_Agelarakes_A_TO_ARCHAI_OLOGIKO_ERGO_STEN_PELOPONNESO_AEPEL1_Praktika_tou_Diethnous_Synedriou_Tripole_7-11_Noembr/citation/download)  
 2480 [es\\_sarkophagou\\_Phaneromenes\\_Chiliomodiou\\_Korka\\_E\\_kai\\_Agelarakes\\_A\\_TO\\_ARCHAI](https://www.researchgate.net/publication/329759926_Nea_stoicheia_peri_tes_porines_grapt_es_sarkophagou_Phaneromenes_Chiliomodiou_Korka_E_kai_Agelarakes_A_TO_ARCHAI_OLOGIKO_ERGO_STEN_PELOPONNESO_AEPEL1_Praktika_tou_Diethnous_Synedriou_Tripole_7-11_Noembr/citation/download)  
 2481 [OLOGIKO\\_ERGO\\_STEN\\_PELOPONNESO\\_AEPEL1\\_Praktika\\_tou\\_Diethnous\\_Synedriou\\_](https://www.researchgate.net/publication/329759926_Nea_stoicheia_peri_tes_porines_grapt_es_sarkophagou_Phaneromenes_Chiliomodiou_Korka_E_kai_Agelarakes_A_TO_ARCHAI_OLOGIKO_ERGO_STEN_PELOPONNESO_AEPEL1_Praktika_tou_Diethnous_Synedriou_Tripole_7-11_Noembr/citation/download)  
 2482 [Tripole\\_7-11\\_Noembr/citation/download](https://www.researchgate.net/publication/329759926_Nea_stoicheia_peri_tes_porines_grapt_es_sarkophagou_Phaneromenes_Chiliomodiou_Korka_E_kai_Agelarakes_A_TO_ARCHAI_OLOGIKO_ERGO_STEN_PELOPONNESO_AEPEL1_Praktika_tou_Diethnous_Synedriou_Tripole_7-11_Noembr/citation/download)

- 2483 50. Korka E. (In Greek) The written early sarcophagus of Faneromenis Chiliomodius of  
2484 Corinth. The Corinthia and the Northeast Peloponnese Topography and History from  
2485 Prehistoric Times until the end of Antiquity. 2013 [cited 2024 Aug 1]. p. 305–11. Available  
2486 from: [https://www.aegeussociety.org/new\\_book/the-corinthia-and-the-northeast-](https://www.aegeussociety.org/new_book/the-corinthia-and-the-northeast-peloponnese-topography-and-history-from-prehistoric-times-until-the-end-of-antiquity/)  
2487 [peloponnese-topography-and-history-from-prehistoric-times-until-the-end-of-antiquity/](https://www.aegeussociety.org/new_book/the-corinthia-and-the-northeast-peloponnese-topography-and-history-from-prehistoric-times-until-the-end-of-antiquity/)
- 2488 51. Tenea Project, Evaggeloglou P (vivi), Elena K. Korka, E. & Evaggeloglou, P. (2020) (In  
2489 Greek) Ancient Tenea. Systematic archaeological research in Chiliomodi, Corinth, 2013-2017.  
2490 AEPEL(2). 2020 [cited 2024 Aug 1]; Available from:  
2491 [https://www.academia.edu/45328998/%CE%9A%CF%8C%CF%81%CE%BA%CE%B1\\_%CE%95\\_and\\_%CE%95%CF%85%CE%B1%CE%B3%CE%B3%CE%AD%CE%BB%CE%BF%CE%B3%CE%BB%CE%BF%CF%85\\_%CE%A0\\_2020\\_%CE%91%CF%81%CF%87%CE%B1%CE%AF%CE%B1\\_%CE%A4%CE%B5%CE%BD%CE%AD%CE%B1\\_%CE%A3%CF%85%CF%83%CF%84%CE%B7%CE%BC%CE%B1%CF%84%CE%B9%CE%BA%CE%AE\\_%CE%B1%CF%81%CF%87%CE%B1%CE%B9%CE%BF%CE%BB%CE%BF%CE%B3%CE%B9%CE%BA%CE%AE\\_%CE%AD%CF%81%CE%B5%CF%85%CE%BD%CE%B1\\_%CF%83%CF%84%CE%BF\\_%CE%A7%CE%B9%CE%BB%CE%B9%CE%BF%CE%BC%CF%8C%CE%B4%CE%B9\\_%CE%9A%CE%BF%CF%81%CE%B9%CE%BD%CE%B8%CE%AF%CE%B1%CF%82\\_2013\\_2017](https://www.academia.edu/45328998/%CE%9A%CF%8C%CF%81%CE%BA%CE%B1_%CE%95_and_%CE%95%CF%85%CE%B1%CE%B3%CE%B3%CE%AD%CE%BB%CE%BF%CE%B3%CE%BB%CE%BF%CF%85_%CE%A0_2020_%CE%91%CF%81%CF%87%CE%B1%CE%AF%CE%B1_%CE%A4%CE%B5%CE%BD%CE%AD%CE%B1_%CE%A3%CF%85%CF%83%CF%84%CE%B7%CE%BC%CE%B1%CF%84%CE%B9%CE%BA%CE%AE_%CE%B1%CF%81%CF%87%CE%B1%CE%B9%CE%BF%CE%BB%CE%BF%CE%B3%CE%B9%CE%BA%CE%AE_%CE%AD%CF%81%CE%B5%CF%85%CE%BD%CE%B1_%CF%83%CF%84%CE%BF_%CE%A7%CE%B9%CE%BB%CE%B9%CE%BF%CE%BC%CF%8C%CE%B4%CE%B9_%CE%9A%CE%BF%CF%81%CE%B9%CE%BD%CE%B8%CE%AF%CE%B1%CF%82_2013_2017)
- 2501 52. Harney É, Cheronet O, Fernandes DM, Sirak K, Mah M, Bernardos R, et al. A minimally  
2502 destructive protocol for DNA extraction from ancient teeth. *Genome Res* . 2021;31:472–83.  
2503 Available from: <http://dx.doi.org/10.1101/gr.267534.120>
- 2504 53. Rohland N, Glocke I, Aximu-Petri A, Meyer M. Extraction of highly degraded DNA from  
2505 ancient bones, teeth and sediments for high-throughput sequencing. *Nat Protoc* .  
2506 2018;13:2447–61. Available from: <http://dx.doi.org/10.1038/s41596-018-0050-5>
- 2507 54. Orfanou E, Himmel M, Aron F, Haak W. Minimally-invasive sampling of pars petrosa (os  
2508 temporale) for ancient DNA extraction. 2020 [cited 2023 Nov 27]; Available from:  
2509 [https://www.protocols.io/view/minimally-invasive-sampling-of-pars-petrosa-os-temp-](https://www.protocols.io/view/minimally-invasive-sampling-of-pars-petrosa-os-temp-bqd8ms9w.pdf)  
2510 [bqd8ms9w.pdf](https://www.protocols.io/view/minimally-invasive-sampling-of-pars-petrosa-os-temp-bqd8ms9w.pdf)
- 2511 55. Allentoft ME, Sikora M, Sjögren K-G, Rasmussen S, Rasmussen M, Stenderup J, et al.  
2512 Population genomics of Bronze Age Eurasia. *Nature* . 2015;522:167–72. Available from:  
2513 <http://dx.doi.org/10.1038/nature14507>
- 2514 56. Meyer M, Kircher M. Illumina sequencing library preparation for highly multiplexed target  
2515 capture and sequencing. *Cold Spring Harb Protoc* . 2010;2010:db.prot5448. Available from:  
2516 <http://dx.doi.org/10.1101/pdb.prot5448>
- 2517 57. Dabney J, Knapp M, Glocke I, Gansauge M-T, Weihmann A, Nickel B, et al. Complete  
2518 mitochondrial genome sequence of a Middle Pleistocene cave bear reconstructed from  
2519 ultrashort DNA fragments. *Proc Natl Acad Sci U S A* . 2013;110:15758–63. Available from:  
2520 <http://dx.doi.org/10.1073/pnas.1314445110>
- 2521 58. Rohland N, Harney E, Mallick S, Nordenfelt S, Reich D. Partial uracil–DNA–glycosylase  
2522 treatment for screening of ancient DNA. *Philos Trans R Soc Lond B Biol Sci* . 2015 [cited 2023  
2523 Nov 27];370. Available from: <https://www.ncbi.nlm.nih.gov/pmc/articles/PMC4275898/>
- 2524 59. Neuenschwander S, Cruz Dávalos DI, Anchieri L, Sousa da Mota B, Bozzi D, Rubinacci  
2525 S, et al. Mapache: a flexible pipeline to map ancient DNA. *Bioinformatics* . 2023 [cited 2023  
2526 May 31];39:btad028. Available from: [https://academic.oup.com/bioinformatics/article-](https://academic.oup.com/bioinformatics/article-pdf/39/2/btad028/50436112/btad028.pdf)  
2527 [pdf/39/2/btad028/50436112/btad028.pdf](https://academic.oup.com/bioinformatics/article-pdf/39/2/btad028/50436112/btad028.pdf)
- 2528 60. Mölder F, Jablonski KP, Letcher B, Hall MB, Tomkins-Tinch CH, Sochat V, et al.

2529 Sustainable data analysis with Snakemake. *F1000Res* . 2021;10:33. Available from:  
2530 <http://dx.doi.org/10.12688/f1000research.29032.2>

2531 61. Schubert M, Lindgreen S, Orlando L. AdapterRemoval v2: rapid adapter trimming,  
2532 identification, and read merging. *BMC Res Notes* . 2016;9:88. Available from:  
2533 <http://dx.doi.org/10.1186/s13104-016-1900-2>

2534 62. Prüfer K, Stenzel U, Hofreiter M, Pääbo S, Kelso J, Green RE. Computational challenges  
2535 in the analysis of ancient DNA. *Genome Biol* . 2010 [cited 2023 Jul 5];11:R47. Available from:  
2536 <https://www.ncbi.nlm.nih.gov/pmc/articles/PMC2898072/>

2537 63. A global reference for human genetic variation. *Nature* . 2015 [cited 2023 Jul 12];526:68–  
2538 74. Available from: <https://www.nature.com/articles/nature15393>

2539 64. Li H, Durbin R. Fast and accurate short read alignment with Burrows–Wheeler transform.  
2540 *Bioinformatics* . 2009 [cited 2023 May 31];25:1754–60. Available from:  
2541 [https://academic.oup.com/bioinformatics/article-](https://academic.oup.com/bioinformatics/article-pdf/25/14/1754/48994219/bioinformatics_25_14_1754.pdf)  
2542 [pdf/25/14/1754/48994219/bioinformatics\\_25\\_14\\_1754.pdf](https://academic.oup.com/bioinformatics/article-pdf/25/14/1754/48994219/bioinformatics_25_14_1754.pdf)

2543 65. Schubert M, Ginolhac A, Lindgreen S, Thompson JF, Al-Rasheid KA, Willerslev E, et al.  
2544 Improving ancient DNA read mapping against modern reference genomes. *BMC Genomics* .  
2545 2012 [cited 2023 May 31];13. Available from: <https://pubmed.ncbi.nlm.nih.gov/22574660/>

2546 66. Oliva A, Tobler R, Cooper A, Llamas B, Souilmi Y. Systematic benchmark of ancient DNA  
2547 read mapping. *Brief Bioinform* . 2021 [cited 2023 May 31];22:bbab076. Available from:  
2548 <https://academic.oup.com/bib/article-pdf/22/5/bbab076/40260467/bbab076.pdf>

2549 67. Li H, Handsaker B, Wysoker A, Fennell T, Ruan J, Homer N, et al. The Sequence  
2550 Alignment/Map format and SAMtools. *Bioinformatics* . 2009 [cited 2023 May 31];25:2078–9.  
2551 Available from: [https://academic.oup.com/bioinformatics/article-](https://academic.oup.com/bioinformatics/article-pdf/25/16/2078/48994296/bioinformatics_25_16_2078.pdf)  
2552 [pdf/25/16/2078/48994296/bioinformatics\\_25\\_16\\_2078.pdf](https://academic.oup.com/bioinformatics/article-pdf/25/16/2078/48994296/bioinformatics_25_16_2078.pdf)

2553 68. Broad Institute. Picard Toolkit. GitHub Repository (<https://broadinstitute.github.io/picard/>).  
2554 2019;

2555 69. Jun G, Wing MK, Abecasis GR, Kang HM. An efficient and scalable analysis framework  
2556 for variant extraction and refinement from population-scale DNA sequence data. *Genome Res*  
2557 . 2015;25:918–25. Available from: <http://dx.doi.org/10.1101/gr.176552.114>

2558 70. Malaspinas A-S, Tange O, Moreno-Mayar JV, Rasmussen M, DeGiorgio M, Wang Y, et  
2559 al. bammds: a tool for assessing the ancestry of low-depth whole-genome data using  
2560 multidimensional scaling (MDS). *Bioinformatics* . 2014 [cited 2023 Jun 1];30:2962–4. Available  
2561 from: [https://academic.oup.com/bioinformatics/article-](https://academic.oup.com/bioinformatics/article-pdf/30/20/2962/48929902/bioinformatics_30_20_2962.pdf)  
2562 [pdf/30/20/2962/48929902/bioinformatics\\_30\\_20\\_2962.pdf](https://academic.oup.com/bioinformatics/article-pdf/30/20/2962/48929902/bioinformatics_30_20_2962.pdf)

2563 71. McKenna A, Hanna M, Banks E, Sivachenko A, Cibulskis K, Kernysky A, et al. The  
2564 Genome Analysis Toolkit: a MapReduce framework for analyzing next-generation DNA  
2565 sequencing data. *Genome Res* . 2010;20:1297–303. Available from:  
2566 <http://dx.doi.org/10.1101/gr.107524.110>

2567 72. Okonechnikov K, Conesa A, García-Alcalde F. Qualimap 2: advanced multi-sample quality  
2568 control for high-throughput sequencing data. *Bioinformatics* . 2016;32:292–4. Available from:  
2569 <http://dx.doi.org/10.1093/bioinformatics/btv566>

2570 73. Mitnik A, Wang C-C, Svoboda J, Krause J. A Molecular Approach to the Sexing of the  
2571 Triple Burial at the Upper Paleolithic Site of Dolní Věstonice. *PLoS One* . 2016 [cited 2023 Jun

2572 23];11:e0163019. Available from: <https://journals.plos.org/plosone/article/file?id=10.1371/journal.pone.0163019&type=printable>  
2573 e  
2574

2575 74. Skoglund P, Storå J, Götherström A, Jakobsson M. Accurate sex identification of ancient  
2576 human remains using DNA shotgun sequencing. *J Archaeol Sci* . 2013 [cited 2023 Jun  
2577 23];40:4477–82. Available from: <http://dx.doi.org/10.1016/j.jas.2013.07.004>

2578 75. Anastasiadou K, Silva M, Booth T, Speidel L, Audsley T, Barrington C, et al. Detection of  
2579 chromosomal aneuploidy in ancient genomes. *Communications Biology* . 2024 [cited 2025 Jul  
2580 25];7:1–9. Available from: <https://www.nature.com/articles/s42003-023-05642-z>

2581 76. Fu Q, Mitnik A, Johnson PLF, Bos K, Lari M, Bollongino R, et al. A revised timescale for  
2582 human evolution based on ancient mitochondrial genomes. *Curr Biol* . 2013;23:553–9.  
2583 Available from: <http://dx.doi.org/10.1016/j.cub.2013.02.044>

2584 77. Green RE, Malaspinas A-S, Krause J, Briggs AW, Johnson PLF, Uhler C, et al. A complete  
2585 Neandertal mitochondrial genome sequence determined by high-throughput sequencing. *Cell*  
2586 . 2008;134:416–26. Available from: <http://dx.doi.org/10.1016/j.cell.2008.06.021>

2587 78. Korneliussen TS, Albrechtsen A, Nielsen R. ANGSD: Analysis of Next Generation  
2588 Sequencing Data. *BMC Bioinformatics* . 2014;15:356. Available from:  
2589 <http://dx.doi.org/10.1186/s12859-014-0356-4>

2590 79. Katoh K, Standley DM. MAFFT Multiple Sequence Alignment Software Version 7:  
2591 Improvements in Performance and Usability. *Mol Biol Evol* . 2013 [cited 2023 Jun 1];30:772.  
2592 Available from: <https://www.ncbi.nlm.nih.gov/pmc/articles/PMC3603318/>

2593 80. Renaud G, Slon V, Duggan AT, Kelso J. Schmutzi: estimation of contamination and  
2594 endogenous mitochondrial consensus calling for ancient DNA. *Genome Biol* . 2015;16:224.  
2595 Available from: <http://dx.doi.org/10.1186/s13059-015-0776-0>

2596 81. Schönherr S, Weissensteiner H, Kronenberg F, Forer L. Haplogrep 3 - an interactive  
2597 haplogroup classification and analysis platform. *Nucleic Acids Res* . 2023;51:W263–8.  
2598 Available from: <http://dx.doi.org/10.1093/nar/gkad284>

2599 82. Rubin JD, Vogel NA, Gopalakrishnan S, Sackett PW, Renaud G. HaploCart: Human  
2600 mtDNA haplogroup classification using a pangenomic reference graph. *PLoS Comput Biol* .  
2601 2023;19:e1011148. Available from: <http://dx.doi.org/10.1371/journal.pcbi.1011148>

2602 83. Mallick S, Reich D. The Allen Ancient DNA Resource (AADR): A curated compendium of  
2603 ancient human genomes . Harvard Dataverse; 2023 [cited 2024 Jul 29]. Available from:  
2604 <https://dataverse.harvard.edu/dataset.xhtml?persistentId=doi:10.7910/DVN/FFIDCW>

2605 84. Ralf A, Montiel González D, Zhong K, Kayser M. Yleaf: Software for Human Y-  
2606 Chromosomal Haplogroup Inference from Next-Generation Sequencing Data. *Mol Biol Evol* .  
2607 2018 [cited 2023 Jun 22];35:1291–4. Available from: <https://academic.oup.com/mbe/article-pdf/35/5/1291/24704771/msy032.pdf>  
2608

2609 85. David Poznik G. Identifying Y-chromosome haplogroups in arbitrarily large samples of  
2610 sequenced or genotyped men . *bioRxiv*. 2016 [cited 2023 Jun 22]. p. 088716. Available from:  
2611 <https://www.biorxiv.org/content/10.1101/088716v1.abstract>

2612 86. Danecek P, Bonfield JK, Liddle J, Marshall J, Ohan V, Pollard MO, et al. Twelve years of  
2613 SAMtools and BCFtools. *Gigascience* . 2021;10. Available from:  
2614 <http://dx.doi.org/10.1093/gigascience/giab008>

2615 87. Mallick S, Micco A, Mah M, Ringbauer H, Lazaridis I, Olalde I, et al. The Allen Ancient  
2616 DNA Resource (AADR): A curated compendium of ancient human genomes. *bioRxiv* . 2023;  
2617 Available from: <http://dx.doi.org/10.1101/2023.04.06.535797>

2618 88. Koptekin D, Yüncü E, Rodríguez-Varela R, Altınışık NE, Psonis N, Kashuba N, et al.  
2619 Spatial and temporal heterogeneity in human mobility patterns in Holocene Southwest Asia  
2620 and the East Mediterranean. *Curr Biol* . 2023;33:41–57.e15. Available from:  
2621 <http://dx.doi.org/10.1016/j.cub.2022.11.034>

2622 89. Patterson N, Price AL, Reich D. Population Structure and Eigenanalysis. *PLoS Genet* .  
2623 2006 [cited 2023 Jun 23];2:e190. Available from:  
2624 [https://journals.plos.org/plosgenetics/article/file?id=10.1371/journal.pgen.0020190&type=prin](https://journals.plos.org/plosgenetics/article/file?id=10.1371/journal.pgen.0020190&type=printable)  
2625 [table](https://journals.plos.org/plosgenetics/article/file?id=10.1371/journal.pgen.0020190&type=printable)

2626 90. Kuhn JMM, Jakobsson M, Günther T. Estimating genetic kin relationships in prehistoric  
2627 populations. *PLoS One* . 2018 [cited 2023 Jun 22];13:e0195491. Available from:  
2628 [https://journals.plos.org/plosone/article/file?id=10.1371/journal.pone.0195491&type=printabl](https://journals.plos.org/plosone/article/file?id=10.1371/journal.pone.0195491&type=printable)  
2629 [e](https://journals.plos.org/plosone/article/file?id=10.1371/journal.pone.0195491&type=printable)

2630 91. Popli D, Peyrégne S, Peter BM. KIN: a method to infer relatedness from low-coverage  
2631 ancient DNA. *Genome Biol* . 2023 [cited 2023 Jun 22];24:1–22. Available from:  
2632 <https://genomebiology.biomedcentral.com/articles/10.1186/s13059-023-02847-7>

2633 92. Psonis N, Vassou D, Nafplioti A, Tabakaki E, Pavlidis P, Stamatakis A, et al. Identification  
2634 of the 18 World War II executed citizens of Adele, Rethymnon, Crete using an ancient DNA  
2635 approach and low coverage genomes. *Forensic Sci Int Genet* . 2024;71:103060. Available  
2636 from: <http://dx.doi.org/10.1016/j.fsigen.2024.103060>

2637 93. Purcell S, Neale B, Todd-Brown K, Thomas L, Ferreira MAR, Bender D, et al. PLINK: a  
2638 tool set for whole-genome association and population-based linkage analyses. *Am J Hum*  
2639 *Genet* . 2007;81:559–75. Available from: <http://dx.doi.org/10.1086/519795>

2640 94. Ringbauer H, Novembre J, Steinrücken M. Parental relatedness through time revealed by  
2641 runs of homozygosity in ancient DNA. *Nat Commun* . 2021;12:5425. Available from:  
2642 <http://dx.doi.org/10.1038/s41467-021-25289-w>

2643 95. Rivollat M, Rohrlach AB, Ringbauer H, Childebayeva A, Mendisco F, Barquera R, et al.  
2644 Extensive pedigrees reveal the social organization of a Neolithic community. *Nature* .  
2645 2023;620:600–6. Available from: <http://dx.doi.org/10.1038/s41586-023-06350-8>

2646 96. Gretzinger J, Schmitt F, Mötsch A, Carlhoff S, Lamnidis TC, Huang Y, et al. Evidence for  
2647 dynastic succession among early Celtic elites in Central Europe. *Nat Hum Behav* . 2024;  
2648 Available from: <http://dx.doi.org/10.1038/s41562-024-01888-7>

2649 97. Rubinacci S, Ribeiro DM, Hofmeister RJ, Delaneau O. Efficient phasing and imputation of  
2650 low-coverage sequencing data using large reference panels. *Nat Genet* . 2021;53:120–6.  
2651 Available from: <http://dx.doi.org/10.1038/s41588-020-00756-0>

2652 98. Allentoft ME, Sikora M, Refoyo-Martínez A, Irving-Pease EK, Fischer A, Barrie W, et al.  
2653 Population genomics of post-glacial western Eurasia. *Nature* . 2024;625:301–11. Available  
2654 from: <http://dx.doi.org/10.1038/s41586-023-06865-0>

2655 99. Link V, Kousathanas A, Veeramah K, Sell C, Scheu A, Wegmann D. ATLAS: Analysis  
2656 Tools for Low-depth and Ancient Samples . *bioRxiv*. 2017 [cited 2023 May 20]. p. 105346.  
2657 Available from: <https://www.biorxiv.org/content/10.1101/105346v2.abstract>

- 2658 100. International HapMap Consortium, Frazer KA, Ballinger DG, Cox DR, Hinds DA, Stuve  
2659 LL, et al. A second generation human haplotype map of over 3.1 million SNPs. *Nature* .  
2660 2007;449:851–61. Available from: <http://dx.doi.org/10.1038/nature06258>
- 2661 101. Ringbauer H, Huang Y, Akbari A, Mallick S, Olalde I, Patterson N, et al. Accurate  
2662 detection of identity-by-descent segments in human ancient DNA. *Nat Genet* . 2024;56:143–  
2663 51. Available from: <http://dx.doi.org/10.1038/s41588-023-01582-w>
- 2664 102. Agranat-Tamir L, Waldman S, Martin MAS, Gokhman D, Mishol N, Eshel T, et al. The  
2665 Genomic History of the Bronze Age Southern Levant. *Cell* . 2020;181:1146–57.e11. Available  
2666 from: <http://dx.doi.org/10.1016/j.cell.2020.04.024>
- 2667 103. Fu Q, Posth C, Hajdinjak M, Petr M, Mallick S, Fernandes D, et al. The genetic history of  
2668 Ice Age Europe. *Nature* . 2016;534:200–5. Available from:  
2669 <http://dx.doi.org/10.1038/nature17993>
- 2670 104. Clemente F, Unterländer M, Dolgova O, Amorim CEG, Corrado-Santos F,  
2671 Neuenschwander S, et al. The genomic history of the Aegean palatial civilizations. *Cell* .  
2672 2021;184:2565–86.e21. Available from: <http://dx.doi.org/10.1016/j.cell.2021.03.039>
- 2673 105. Freilich S, Ringbauer H, Los D, Novak M, Pavičić DT, Schiffels S, et al. Reconstructing  
2674 genetic histories and social organisation in Neolithic and Bronze Age Croatia. *Sci Rep* .  
2675 2021;11:16729. Available from: <http://dx.doi.org/10.1038/s41598-021-94932-9>
- 2676 106. Feldman M, Fernández-Domínguez E, Reynolds L, Baird D, Pearson J, Hershkovitz I, et  
2677 al. Late Pleistocene human genome suggests a local origin for the first farmers of central  
2678 Anatolia. *Nat Commun* . 2019;10:1218. Available from: <http://dx.doi.org/10.1038/s41467-019-09209-7>
- 2680 107. De Angelis F, Romboni M, Veltre V, Catalano P, Martínez-Labarga C, Gazzaniga V, et  
2681 al. First Glimpse into the Genomic Characterization of People from the Imperial Roman  
2682 Community of Casal Bertone (Rome, First–Third Centuries AD). *Genes* . 2022 [cited 2024 Mar  
2683 22];13:136. Available from: <https://www.mdpi.com/2073-4425/13/1/136>
- 2684 108. Fernandes DM, Mitnik A, Olalde I, Lazaridis I, Cheronet O, Rohland N, et al. The spread  
2685 of steppe and Iranian-related ancestry in the islands of the western Mediterranean. *Nat Ecol*  
2686 *Evol* . 2020;4:334–45. Available from: <http://dx.doi.org/10.1038/s41559-020-1102-0>
- 2687 109. Hofmanová Z, Kreutzer S, Hellenthal G, Sell C, Diekmann Y, Díez-Del-Molino D, et al.  
2688 Early farmers from across Europe directly descended from Neolithic Aegeans. *Proc Natl Acad*  
2689 *Sci U S A* . 2016;113:6886–91. Available from: <http://dx.doi.org/10.1073/pnas.1523951113>
- 2690 110. Jones ER, Gonzalez-Fortes G, Connell S, Siska V, Eriksson A, Martiniano R, et al. Upper  
2691 Palaeolithic genomes reveal deep roots of modern Eurasians. *Nat Commun* . 2015;6:8912.  
2692 Available from: <http://dx.doi.org/10.1038/ncomms9912>
- 2693 111. Lazaridis I, Nadel D, Rollefson G, Merrett DC, Rohland N, Mallick S, et al. Genomic  
2694 insights into the origin of farming in the ancient Near East. *Nature* . 2016;536:419–24.  
2695 Available from: <http://dx.doi.org/10.1038/nature19310>
- 2696 112. Lazaridis I, Mitnik A, Patterson N, Mallick S, Rohland N, Pfrengle S, et al. Genetic origins  
2697 of the Minoans and Mycenaeans. *Nature* . 2017;548:214–8. Available from:  
2698 <http://dx.doi.org/10.1038/nature23310>
- 2699 113. Marchi N, Winkelbach L, Schulz I, Brami M, Hofmanová Z, Blöcher J, et al. The genomic  
2700 origins of the world's first farmers. *Cell* . 2022;185:1842–59.e18. Available from:



2701 <http://dx.doi.org/10.1016/j.cell.2022.04.008>

2702 114. Marcus JH, Posth C, Ringbauer H, Lai L, Skeates R, Sidore C, et al. Genetic history from  
 2703 the Middle Neolithic to present on the Mediterranean island of Sardinia. *Nat Commun* .  
 2704 2020;11:939. Available from: <http://dx.doi.org/10.1038/s41467-020-14523-6>

2705 115. Mathieson I, Lazaridis I, Rohland N, Mallick S, Patterson N, Roodenberg SA, et al.  
 2706 Genome-wide patterns of selection in 230 ancient Eurasians. *Nature* . 2015;528:499–503.  
 2707 Available from: <http://dx.doi.org/10.1038/nature16152>

2708 116. Mathieson I, Alpaslan-Roodenberg S, Posth C, Szécsényi-Nagy A, Rohland N, Mallick  
 2709 S, et al. The genomic history of southeastern Europe. *Nature* . 2018;555:197–203. Available  
 2710 from: <http://dx.doi.org/10.1038/nature25778>

2711 117. Moots HM, Antonio M, Sawyer S, Spence JP, Oberreiter V, Weiß CL, et al. A genetic  
 2712 history of continuity and mobility in the Iron Age central Mediterranean. *Nat Ecol Evol* .  
 2713 2023;7:1515–24. Available from: <http://dx.doi.org/10.1038/s41559-023-02143-4>

2714 118. Narasimhan VM, Patterson N, Moorjani P, Rohland N, Bernardos R, Mallick S, et al. The  
 2715 formation of human populations in South and Central Asia. *Science* . 2019;365. Available from:  
 2716 <http://dx.doi.org/10.1126/science.aat7487>

2717 119. Olalde I, Allentoft ME, Sánchez-Quinto F, Santpere G, Chiang CWK, DeGiorgio M, et al.  
 2718 Derived immune and ancestral pigmentation alleles in a 7,000-year-old Mesolithic European.  
 2719 *Nature* . 2014;507:225–8. Available from: <http://dx.doi.org/10.1038/nature12960>

2720 120. Olalde I, Brace S, Allentoft ME, Armit I, Kristiansen K, Booth T, et al. Erratum: The Beaker  
 2721 phenomenon and the genomic transformation of northwest Europe. *Nature* . 2018;555:543.  
 2722 Available from: <http://dx.doi.org/10.1038/nature26164>

2723 121. Patterson N, Isakov M, Booth T, Büster L, Fischer C-E, Olalde I, et al. Large-scale  
 2724 migration into Britain during the Middle to Late Bronze Age. *Nature* . 2022;601:588–94.  
 2725 Available from: <http://dx.doi.org/10.1038/s41586-021-04287-4>

2726 122. Posth C, Zaro V, Spyrou MA, Vai S, Gneccchi-Ruscione GA, Modi A, et al. The origin and  
 2727 legacy of the Etruscans through a 2000-year archeogenomic time transect. *Sci Adv* .  
 2728 2021;7:eabi7673. Available from: <http://dx.doi.org/10.1126/sciadv.abi7673>

2729 123. Raghavan M, Skoglund P, Graf KE, Metspalu M, Albrechtsen A, Moltke I, et al. Upper  
 2730 Palaeolithic Siberian genome reveals dual ancestry of Native Americans. *Nature* .  
 2731 2014;505:87–91. Available from: <http://dx.doi.org/10.1038/nature12736>

2732 124. Skourtanioti E, Erdal YS, Frangipane M, Balossi Restelli F, Yener KA, Pinnock F, et al.  
 2733 Genomic History of Neolithic to Bronze Age Anatolia, Northern Levant, and Southern  
 2734 Caucasus. *Cell* . 2020;181:1158–75.e28. Available from:  
 2735 <http://dx.doi.org/10.1016/j.cell.2020.04.044>

2736 125. van de Loosdrecht M, Bouzouggar A, Humphrey L, Posth C, Barton N, Aximu-Petri A, et  
 2737 al. Pleistocene North African genomes link Near Eastern and sub-Saharan African human  
 2738 populations. *Science* . 2018;360:548–52. Available from:  
 2739 <http://dx.doi.org/10.1126/science.aar8380>

2740 126. van den Brink ECM, Beeri R, Kirzner D, Bron E, Cohen-Weinberger A, Kamaisky E, et  
 2741 al. A Late Bronze Age II clay coffin from Tel Shaddud in the Central Jezreel Valley, Israel:  
 2742 context and historical implications. *Levantina* . 2017;49:105–35. Available from:  
 2743 <https://doi.org/10.1080/00758914.2017.1368204>

2744 127. Wang C-C, Reinhold S, Kalmykov A, Wissgott A, Brandt G, Jeong C, et al. Ancient human  
2745 genome-wide data from a 3000-year interval in the Caucasus corresponds with eco-  
2746 geographic regions. *Nat Commun* . 2019;10:590. Available from:  
2747 <http://dx.doi.org/10.1038/s41467-018-08220-8>

2748 128. Yu H, van de Loosdrecht MS, Mannino MA, Talamo S, Rohrlach AB, Childebayeva A, et  
2749 al. Genomic and dietary discontinuities during the Mesolithic and Neolithic in Sicily. *iScience* .  
2750 2022;25:104244. Available from: <http://dx.doi.org/10.1016/j.isci.2022.104244>

2751 129. Ingman T, Eisenmann S, Skourtanioti E, Akar M, Ilgner J, Gneccchi Ruscone GA, et al.  
2752 Human mobility at Tell Atchana (Alalakh), Hatay, Turkey during the 2nd millennium BC:  
2753 Integration of isotopic and genomic evidence. *PLoS One* . 2021;16:e0241883. Available from:  
2754 <http://dx.doi.org/10.1371/journal.pone.0241883>

2755 130. Schuenemann VJ, Peltzer A, Welte B, van Pelt WP, Molak M, Wang C-C, et al. Ancient  
2756 Egyptian mummy genomes suggest an increase of Sub-Saharan African ancestry in post-  
2757 Roman periods. *Nature Communications* . 2017 [cited 2025 Jul 23];8:15694. Available from:  
2758 <https://pmc.ncbi.nlm.nih.gov/articles/PMC5459999/>

2759 131. Aneli S, Saupe T, Montinaro F, Solnik A, Molinaro L, Scaggion C, et al. The Genetic  
2760 Origin of Daunians and the Pan-Mediterranean Southern Italian Iron Age Context. *Molecular*  
2761 *biology and evolution* . 2022 [cited 2025 Jul 23];39. Available from:  
2762 <https://pubmed.ncbi.nlm.nih.gov/35038748/>

2763 132. Skourtanioti E, Ringbauer H, Gneccchi Ruscone GA, Bianco RA, Burri M, Freund C, et al.  
2764 Ancient DNA reveals admixture history and endogamy in the prehistoric Aegean. *Nat Ecol*  
2765 *Evol* . 2023;7:290–303. Available from: <http://dx.doi.org/10.1038/s41559-022-01952-3>

2766 133. Reitsema LJ, Mitnik A, Kyle B, Catalano G, Fabbri PF, Kazmi ACS, et al. The diverse  
2767 genetic origins of a Classical period Greek army. *Proc Natl Acad Sci U S A* .  
2768 2022;119:e2205272119. Available from: <http://dx.doi.org/10.1073/pnas.2205272119>

2769 134. Haag J, Jordan AI, Stamatakis A. Pandora: A Tool to Estimate Dimensionality Reduction  
2770 Stability of Genotype Data . *bioRxiv*. 2024 [cited 2024 Aug 27]. p. 2024.03.14.584962.  
2771 Available from: <https://www.biorxiv.org/content/10.1101/2024.03.14.584962v1>

2772 135. Alexander DH, Novembre J, Lange K. Fast model-based estimation of ancestry in  
2773 unrelated individuals. *Genome Res* . 2009;19:1655–64. Available from:  
2774 <http://dx.doi.org/10.1101/gr.094052.109>

2775 136. Chang CC, Chow CC, Tellier LC, Vattikuti S, Purcell SM, Lee JJ. Second-generation  
2776 PLINK: rising to the challenge of larger and richer datasets. *Gigascience* . 2015;4:7. Available  
2777 from: <http://dx.doi.org/10.1186/s13742-015-0047-8>

2778 137. Davis TL. Command Line Optional and Positional Argument Parser [R package argparse  
2779 version 2.2.3]. 2024 [cited 2024 Jul 29]; Available from: [https://CRAN.R-](https://CRAN.R-project.org/package=argparse)  
2780 [project.org/package=argparse](https://CRAN.R-project.org/package=argparse)

2781 138. Analytics R, Weston S. Foreach Parallel Adaptor for “parallel” [R package doMC version  
2782 1.3.8]. 2022 [cited 2024 Jul 29]; Available from: <https://CRAN.R-project.org/package=doMC>

2783 139. Microsoft, Weston. Provides Foreach Looping Construct [R package foreach version  
2784 1.5.2]. 2022 [cited 2024 Jul 29]; Available from: <https://CRAN.R-project.org/package=foreach>

2785 140. van den Brand T. Hacks for “ggplot2” [R package ggh4x version 0.2.8]. 2024 [cited 2024  
2786 Jul 29]; Available from: <https://CRAN.R-project.org/package=ggh4x>

2787 141. Arnold JB. Extra Themes, Scales and Geoms for “ggplot2” [R package ggthemes version  
2788 5.0.0]. 2023 [cited 2024 Jul 29]; Available from: [https://CRAN.R-](https://CRAN.R-project.org/package=ggthemes)  
2789 [project.org/package=ggthemes](https://CRAN.R-project.org/package=ggthemes)

2790 142. Auguie B. Miscellaneous Functions for “Grid” Graphics [R package gridExtra version 2.3].  
2791 2017 [cited 2024 Jul 29]; Available from: <https://CRAN.R-project.org/package=gridExtra>

2792 143. Wickham H. Reshaping Data with the reshape Package. J Stat Softw . 2007 [cited 2024  
2793 Jul 8];21:1–20. Available from: <http://www.jstatsoft.org/v21/i12/>.

2794 144. Wickham H. Simple, Consistent Wrappers for Common String Operations [R package  
2795 stringr version 1.5.1]. 2023 [cited 2024 Jul 29]; Available from: [https://CRAN.R-](https://CRAN.R-project.org/package=stringr)  
2796 [project.org/package=stringr](https://CRAN.R-project.org/package=stringr)

2797 145. Harney É, Patterson N, Reich D, Wakeley J. Assessing the performance of qpAdm: a  
2798 statistical tool for studying population admixture. Genetics . 2021;217. Available from:  
2799 <http://dx.doi.org/10.1093/genetics/iyaa045>

2800 146. Maier R, Flegontov P, Flegontova O, Işıldak U, Changmai P, Reich D. On the limits of  
2801 fitting complex models of population history to f-statistics. Elife . 2023;12. Available from:  
2802 <http://dx.doi.org/10.7554/eLife.85492>

2803 147. Lazaridis I, Alpaslan-Roodenberg S, Acar A, Açikkol A, Agelarakis A, Aghikyan L, et al.  
2804 The genetic history of the Southern Arc: A bridge between West Asia and Europe. Science .  
2805 2022;377:eabm4247. Available from: <http://dx.doi.org/10.1126/science.abm4247>

2806 148. Maier R, Patterson N. admixtools: Inferring demographic history from genetic data . 2024.  
2807 Available from: <https://uqrmaie1.github.io/admixtools/>

2808 149. Harrell FE Jr. Harrell Miscellaneous [R package Hmisc version 5.1-3]. 2024 [cited 2024  
2809 Aug 9]; Available from: <https://CRAN.R-project.org/package=Hmisc>

2810 150. Chaitanya L, Breslin K, Zuñiga S, Wirken L, Pośpiech E, Kukla-Bartoszek M, et al. The  
2811 HlrisPlex-S system for eye, hair and skin colour prediction from DNA: Introduction and forensic  
2812 developmental validation. Forensic Sci Int Genet . 2018;35:123–35. Available from:  
2813 <http://dx.doi.org/10.1016/j.fsigen.2018.04.004>

2814 151. Walsh S, Liu F, Wollstein A, Kovatsi L, Ralf A, Kosiniak-Kamysz A, et al. The HlrisPlex  
2815 system for simultaneous prediction of hair and eye colour from DNA. Forensic Sci Int Genet .  
2816 2013;7:98–115. Available from: <http://dx.doi.org/10.1016/j.fsigen.2012.07.005>

2817 152. Maróti Z, Nyerki E, Neparaczki E, Török T, Varga GI, Kalmár T. aHISplex: an imputation  
2818 based method for eye, hair and skin colour prediction from low coverage ancient DNA .  
2819 bioRxiv. 2023 [cited 2024 Jul 8]. p. 2023.11.02.565295. Available from:  
2820 <https://www.biorxiv.org/content/10.1101/2023.11.02.565295v1>

2821 153. Brace S, Diekmann Y, Booth TJ, van Dorp L, Faltyskova Z, Rohland N, et al. Ancient  
2822 genomes indicate population replacement in Early Neolithic Britain. Nat Ecol Evol .  
2823 2019;3:765–71. Available from: <http://dx.doi.org/10.1038/s41559-019-0871-9>

2824 154. Galván-Femenía I, Obón-Santacana M, Piñeyro D, Guindo-Martinez M, Duran X,  
2825 Carreras A, et al. Multitrait genome association analysis identifies new susceptibility genes for  
2826 human anthropometric variation in the GCAT cohort. Journal of medical genetics . 2018 [cited  
2827 2025 Sep 30];55. Available from: <https://pubmed.ncbi.nlm.nih.gov/30166351/>

2828 155. Sulem P, Gudbjartsson DF, Stacey SN, Helgason A, Rafnar T, Magnusson KP, et al.

2829 Genetic determinants of hair, eye and skin pigmentation in Europeans. *Nature genetics* . 2007  
2830 [cited 2025 Sep 30];39. Available from: <https://pubmed.ncbi.nlm.nih.gov/17952075/>

2831 156. Boussiou M, Karababa P, Sinopoulou K, Tsaftaridis P, Plata E, Loutradi-Anagnostou A.  
2832 The molecular heterogeneity of  $\beta$ -thalassemia in Greece. *Blood Cells Mol Dis* . 2008;40:317–  
2833 9. Available from: <https://www.sciencedirect.com/science/article/pii/S1079979607002549>

2834 157. Georgiou I, Makis A, Chaidos A, Bouba I, Hatzi E, Kranas V, et al. Distribution and  
2835 frequency of beta-thalassemia mutations in northwestern and central Greece. *Eur J Haematol*  
2836 . 2003;70:75–8. Available from: <http://dx.doi.org/10.1034/j.1600-0609.2003.00017.x>

2837 158. Breitwieser FP, Baker DN, Salzberg SL. KrakenUniq: confident and fast metagenomics  
2838 classification using unique k-mer counts. *Genome Biol* . 2018;19:198. Available from:  
2839 <http://dx.doi.org/10.1186/s13059-018-1568-0>

2840 159. Herbig A, Maixner F, Bos KI, Zink A, Krause J, Huson DH. MALT: Fast alignment and  
2841 analysis of metagenomic DNA sequence data applied to the Tyrolean Iceman . *bioRxiv*. 2016  
2842 [cited 2024 Jul 2]. p. 050559. Available from:  
2843 <https://www.biorxiv.org/content/10.1101/050559v1>

2844 160. Hübner R, Key FM, Warinner C, Bos KI, Krause J, Herbig A. HOPS: automated detection  
2845 and authentication of pathogen DNA in archaeological remains. *Genome Biol* . 2019;20:280.  
2846 Available from: <http://dx.doi.org/10.1186/s13059-019-1903-0>

2847 161. Pochon Z, Bergfeldt N, Kirdök E, Vicente M, Naidoo T, van der Valk T, et al. aMeta: an  
2848 accurate and memory-efficient ancient metagenomic profiling workflow. *Genome Biol* .  
2849 2023;24:242. Available from: <http://dx.doi.org/10.1186/s13059-023-03083-9>

2850 162. Barbulescu M, Turner G, Seaman MI, Deinard AS, Kidd KK, Lenz J. Many human  
2851 endogenous retrovirus K (HERV-K) proviruses are unique to humans. *Curr Biol* . 1999;9:861–  
2852 8. Available from: [http://dx.doi.org/10.1016/s0960-9822\(99\)80390-x](http://dx.doi.org/10.1016/s0960-9822(99)80390-x)

2853 163. Mann AE, Yates JAF, Fagernäs Z, Austin RM, Nelson EA, Hofman CA. Do I have  
2854 something in my teeth? The trouble with genetic analyses of diet from archaeological dental  
2855 calculus. *Quaternary International* . 2023 [cited 2025 Jul 25];653-654:33–46. Available from:  
2856 <http://dx.doi.org/10.1016/j.quaint.2020.11.019>

2857 164. R Core Team. R: A Language and Environment for Statistical Computing. R Foundation  
2858 for Statistical Computing, Vienna, Austria. 2023;

2859 165. Massicotte P, South A. World Map Data from Natural Earth [R package *naturalearth*  
2860 version 1.0.1]. 2023 [cited 2024 Aug 6]; Available from: [https://CRAN.R-](https://CRAN.R-project.org/package=rnaturalearth)  
2861 [project.org/package=rnaturalearth](https://CRAN.R-project.org/package=rnaturalearth)

2862 166. Pebesma E. Simple Features for R [R package *sf* version 1.0-16]. 2024 [cited 2024 Aug  
2863 6]; Available from: <https://CRAN.R-project.org/package=sf>

2864 167. Urbanek S. proj4: A simple interface to the PROJ.4 cartographic projections library. [cited  
2865 2024 Aug 6]; Available from: <https://CRAN.R-project.org/package=proj4>

2866 168. Wickham H. *ggplot2* . Springer International Publishing; [cited 2024 Jul 5]. Available from:  
2867 <https://link.springer.com/book/10.1007/978-3-319-24277-4>

2868 169. Slowikowski K. Automatically Position Non-Overlapping Text Labels with “ggplot2” [R  
2869 package *ggrepel* version 0.9.5]. 2024 [cited 2024 Aug 7]; Available from: [https://CRAN.R-](https://CRAN.R-project.org/package=ggrepel)  
2870 [project.org/package=ggrepel](https://CRAN.R-project.org/package=ggrepel)

2871 170. Waskom M. seaborn: statistical data visualization. J Open Source Softw . 2021;6:3021.  
2872 Available from: <https://joss.theoj.org/papers/10.21105/joss.03021>

2873 171. Hugh-Jones D. ggmagnify: Create a Magnified Inset of Part of a “Ggplot” Object.  
2874 <https://github.com/hughjonesd/ggmagnify>. 2024;

2875 172. Wilke CO, Wiernik BM. Improved Text Rendering Support for “ggplot2” [R package ggtext  
2876 version 0.1.2]. 2022 [cited 2024 Sep 10]; Available from: [https://CRAN.R-](https://CRAN.R-project.org/package=ggtext)  
2877 [project.org/package=ggtext](https://CRAN.R-project.org/package=ggtext)

2878 173. Hoppe KA, Koch PL, Furutani TT. Assessing the preservation of biogenic strontium in  
2879 fossil bones and tooth enamel. Int J Osteoarchaeol . 2003;13:20–8. Available from:  
2880 <https://onlinelibrary.wiley.com/doi/10.1002/oa.663>

2881 174. Hillson S. Dental Anthropology . Cambridge University Press; 1996. Available from:  
2882 <https://play.google.com/store/books/details?id=WlcgAwAAQBAJ>

2883 175. Price TD, Burton JH, Bentley RA. The Characterization of Biologically Available Strontium  
2884 Isotope Ratios for the Study of Prehistoric Migration. Archaeometry . 2002 [cited 2024 Aug  
2885 22];44:117–35. Available from: [https://onlinelibrary.wiley.com/doi/abs/10.1111/1475-](https://onlinelibrary.wiley.com/doi/abs/10.1111/1475-4754.00047)  
2886 [4754.00047](https://onlinelibrary.wiley.com/doi/abs/10.1111/1475-4754.00047)

2887 176. Evans J, Montgomery J, Wildman G. Isotope domain mapping of <sup>87</sup>Sr/<sup>86</sup>Sr biosphere  
2888 variation on the Isle of Skye, Scotland. J Geol Soc London . 2009 [cited 2024 Aug  
2889 22];166:617–31. Available from: <http://nora.nerc.ac.uk/id/eprint/7960/>

2890 177. Alexander Bentley R. Strontium Isotopes from the Earth to the Archaeological Skeleton:  
2891 A Review. Journal of Archaeological Method and Theory . 2006 [cited 2024 Aug 22];13:135–  
2892 87. Available from: <https://link.springer.com/article/10.1007/s10816-006-9009-x>

2893 178. Nafplioti A. Moving Forward: Strontium Isotope Mobility Research in the Aegean.  
2894 Mediterranean Archaeology and Archaeometry . 2021 [cited 2024 Aug 22];21:165–79.  
2895 Available from:  
2896 [https://www.academia.edu/76198598/%CE%9Coving\\_Foward\\_Strontium\\_Isotope\\_Mobility\\_](https://www.academia.edu/76198598/%CE%9Coving_Foward_Strontium_Isotope_Mobility_Research_in_the_Aegean)  
2897 [Research\\_in\\_the\\_Aegean](https://www.academia.edu/76198598/%CE%9Coving_Foward_Strontium_Isotope_Mobility_Research_in_the_Aegean)

2898 179. Nafplioti A. Tracing population mobility in the Aegean using isotope geochemistry: a first  
2899 map of local biologically available <sup>87</sup>Sr/<sup>86</sup>Sr signatures. J Archaeol Sci . 2011 [cited 2024 Aug  
2900 22];38:1560–70. Available from: <http://dx.doi.org/10.1016/j.jas.2011.02.021>

2901 180. Nafplioti A. “Mycenaean” political domination of Knossos following the Late Minoan IB  
2902 destructions on Crete: negative evidence from strontium isotope ratio analysis (<sup>87</sup>Sr/<sup>86</sup>Sr). J  
2903 Archaeol Sci . 2008 [cited 2024 Aug 22];35:2307–17. Available from:  
2904 <http://dx.doi.org/10.1016/j.jas.2008.03.006>

2905 181. Faure G. Principles of Isotope Geology . New York: John Wile and Sons; 1986. Available  
2906 from:  
2907 [https://books.google.com/books/about/Principles\\_of\\_Isotope\\_Geology.html?hl=&id=xlfwAAA](https://books.google.com/books/about/Principles_of_Isotope_Geology.html?hl=&id=xlfwAAAAMAAJ)  
2908 [AMAAJ](https://books.google.com/books/about/Principles_of_Isotope_Geology.html?hl=&id=xlfwAAAAMAAJ)

2909 182. Graeme R, Christopher JH. A geochemical traverse across the North Chilean Andes:  
2910 evidence for crust generation from the mantle wedge. Earth Planet Sci Lett . 1989 [cited 2024  
2911 Aug 22];91:271–85. Available from: [http://dx.doi.org/10.1016/0012-821X\(89\)90003-4](http://dx.doi.org/10.1016/0012-821X(89)90003-4)

2912 183. Wright LE. Identifying immigrants to Tikal, Guatemala: Defining local variability in  
2913 strontium isotope ratios of human tooth enamel. J Archaeol Sci . 2005 [cited 2024 Aug

- 2914 22];32:555–66. Available from: <http://dx.doi.org/10.1016/j.jas.2004.11.011>
- 2915 184. Palmer MR, Elderfield H. Sr isotope composition of sea water over the past 75 Myr.  
 2916 *Nature* . 1985 [cited 2024 Aug 22];314:526–8. Available from:  
 2917 <https://www.nature.com/articles/314526a0>
- 2918 185. Elderfield H. Strontium isotope stratigraphy. *Palaeogeogr Palaeoclimatol Palaeoecol* .  
 2919 1986 [cited 2024 Aug 22];57:71–90. Available from: [http://dx.doi.org/10.1016/0031-](http://dx.doi.org/10.1016/0031-0182(86)90007-6)  
 2920 [0182\(86\)90007-6](http://dx.doi.org/10.1016/0031-0182(86)90007-6)
- 2921 186. Blum JD, Taliaferro EH, Weisse MT, Holmes RT. Changes in Sr/Ca, Ba/Ca and  
 2922  $^{87}\text{Sr}/^{86}\text{Sr}$  ratios between trophic levels in two forest ecosystems in the northeastern U.S.A.  
 2923 *Biogeochemistry* . 2000 [cited 2024 Aug 22];49:87–101. Available from:  
 2924 <https://link.springer.com/article/10.1023/A:1006390707989>
- 2925 187. Graustein WC.  $^{87}\text{Sr}/^{86}\text{Sr}$  Ratios Measure the Sources and Flow of Strontium in  
 2926 Terrestrial Ecosystems. *Stable Isotopes in Ecological Research* . 1989 [cited 2024 Aug  
 2927 22];491–512. Available from: [https://link.springer.com/chapter/10.1007/978-1-4612-3498-](https://link.springer.com/chapter/10.1007/978-1-4612-3498-2_28)  
 2928 [2\\_28](https://link.springer.com/chapter/10.1007/978-1-4612-3498-2_28)
- 2929 188. Veizer J. Strontium Isotopes in Seawater through Time. *Annu Rev Earth Planet Sci* . 1989  
 2930 [cited 2024 Aug 29]; Available from: <https://doi.org/10.1146/ANNUREV.EA.17.050189.001041>
- 2931 189. Miller EK, Panek JA, Friedland AJ, Kadlecsek J, Mohnen VA. Atmospheric deposition to  
 2932 a high-elevation forest at Whiteface Mountain, New York, USA. *Tellus B Chem Phys Meteorol*  
 2933 . 1993 [cited 2024 Aug 29];45:209–27. Available from:  
 2934 <https://onlinelibrary.wiley.com/doi/abs/10.1034/j.1600-0889.1993.t01-2-00001.x>
- 2935 190. Ubelaker DH. *Human Skeletal Remains: Excavation, Analysis, Interpretation* .  
 2936 Washington: Taraxacum Press; 1989. Available from:  
 2937 [https://books.google.com/books/about/Human\\_Skeletal\\_Remains.html?hl=&id=5bfczgEACA](https://books.google.com/books/about/Human_Skeletal_Remains.html?hl=&id=5bfczgEACA)  
 2938 AJ
- 2939 191. Chiaradia M, Gallay A, Todt W. Different contamination styles of prehistoric human teeth  
 2940 at a Swiss necropolis (Sion, Valais) inferred from lead and strontium isotopes. *Appl Geochem*  
 2941 . 2003 [cited 2024 Aug 22];18:353–70. Available from: [http://dx.doi.org/10.1016/S0883-](http://dx.doi.org/10.1016/S0883-2927(02)00072-0)  
 2942 [2927\(02\)00072-0](http://dx.doi.org/10.1016/S0883-2927(02)00072-0)
- 2943 192. Lee-Thorp JA, Sponheimer M. Three case studies used to reassess the reliability of fossil  
 2944 bone and enamel isotope signals for paleodietary studies. *Journal of Anthropological*  
 2945 *Archaeology* . 2003 [cited 2024 Aug 22];22:208–16. Available from:  
 2946 [http://dx.doi.org/10.1016/S0278-4165\(03\)00035-7](http://dx.doi.org/10.1016/S0278-4165(03)00035-7)
- 2947 193. Kohn MJ, Schoeninger MJ, Barker WW. Altered states: Effects of diagenesis on fossil  
 2948 tooth chemistry. *GeCoA* . 1999 [cited 2024 Aug 22];63:2737–47. Available from:  
 2949 <https://ui.adsabs.harvard.edu/abs/1999GeCoA..63.2737K/abstract>
- 2950 194. Price TD, Schoeninger MJ, Armelagos GJ. Bone chemistry and past behavior: an  
 2951 overview. *JHumE* . 1985 [cited 2024 Aug 22];14:419–47. Available from:  
 2952 <https://ui.adsabs.harvard.edu/abs/1985JHumE..14..419P/abstract>
- 2953 195. Hedges REM, Clement JG, Thomas CDL, O'Connell TC. Collagen turnover in the adult  
 2954 femoral mid-shaft: Modeled from anthropogenic radiocarbon tracer measurements. *Am J Phys*  
 2955 *Anthropol* . 2007 [cited 2024 Aug 22];133:808–16. Available from:  
 2956 <https://onlinelibrary.wiley.com/doi/abs/10.1002/ajpa.20598>

- 2957 196. Tafuri MA, Alexander Bentley R, Manzi G, di Lernia S. Mobility and kinship in the  
2958 prehistoric Sahara: Strontium isotope analysis of Holocene human skeletons from the Acacus  
2959 Mts. (southwestern Libya). *Journal of Anthropological Archaeology* . 2006 [cited 2024 Aug  
2960 22];3:390–402. Available from: [https://www.infona.pl/resource/bwmeta1.element.elsevier-](https://www.infona.pl/resource/bwmeta1.element.elsevier-feb8936c-ce90-3401-b94d-dfc7249a1351)  
2961 [feb8936c-ce90-3401-b94d-dfc7249a1351](https://www.infona.pl/resource/bwmeta1.element.elsevier-feb8936c-ce90-3401-b94d-dfc7249a1351)
- 2962 197. Manolagas SC. Birth and Death of Bone Cells: Basic Regulatory Mechanisms and  
2963 Implications for the Pathogenesis and Treatment of Osteoporosis\*. *Endocr Rev* . 2000 [cited  
2964 2024 Aug 22];21:115–37. Available from: [https://academic.oup.com/edrv/article-](https://academic.oup.com/edrv/article-pdf/21/2/115/8859550/edrv0115.pdf)  
2965 [pdf/21/2/115/8859550/edrv0115.pdf](https://academic.oup.com/edrv/article-pdf/21/2/115/8859550/edrv0115.pdf)
- 2966 198. Ezzo J, Price T. Migration, Regional Reorganization, and Spatial Group Composition at  
2967 Grasshopper Pueblo, Arizona. *J Archaeol Sci* . 2002 [cited 2024 Aug 22]; Available from:  
2968 <https://doi.org/10.1006/JASC.2001.0745>
- 2969 199. Price TD, Johnson CM, Ezzo JA, Ericson J, Burton JH. Residential Mobility in the  
2970 Prehistoric Southwest United States: A Preliminary Study using Strontium Isotope Analysis.  
2971 *JArSc* . 1994 [cited 2024 Aug 22];21:315–30. Available from:  
2972 <https://ui.adsabs.harvard.edu/abs/1994JArSc..21..315P/abstract>
- 2973 200. Higgins MD, Higgins RA. *A Geological Companion to Greece and the Aegean* . Cornell  
2974 University Press; 1996. Available from:  
2975 [https://books.google.com/books/about/A\\_Geological\\_Companion\\_to\\_Greece\\_and\\_the.html?](https://books.google.com/books/about/A_Geological_Companion_to_Greece_and_the.html?hl=&id=Q-0jraoNqvUC)  
2976 [hl=&id=Q-0jraoNqvUC](https://books.google.com/books/about/A_Geological_Companion_to_Greece_and_the.html?hl=&id=Q-0jraoNqvUC)
- 2977 201. Higgins, Higgins RA. *A Geological Companion to Greece and the Aegean* . Cornell  
2978 University Press / Duckworth Publishers; 1996. Available from:  
2979 [https://www.researchgate.net/publication/257233658\\_A\\_Geological\\_Companion\\_to\\_Greece](https://www.researchgate.net/publication/257233658_A_Geological_Companion_to_Greece_and_the_Aegean)  
2980 [\\_and\\_the\\_Aegean](https://www.researchgate.net/publication/257233658_A_Geological_Companion_to_Greece_and_the_Aegean)
- 2981 202. Nafplioti A. Population movement, biological and cultural interactions in the EBA Aegean:  
2982 The case of Manika. Unpublished report submitted to the American School of Classical  
2983 Studies at Athens (ASCSA) for research carried out through a J.L. Angel Fellowship in Human  
2984 Skeletal Studies . 2008 [cited 2024 Sep 5]. Available from:  
2985 <https://www.ascsa.edu.gr/research/wiener-laboratory/research/research-archive>
- 2986
