# Supplementary material for: Genetic affinities between an ancient Greek colony and its metropolis: the case of Amvrakia in western Greece
Source: Research Square preprint supplement (doi:10.21203/rs.3.rs-5069671/v1), 2025-11-01
Supplement: Supplementary file 5 [file a1742eea8e64cd9ef4bb2263.xlsx]

## Sheet: Damage
Individual ID	Library ID	Deamination damage at 1st position of 5' end	Comment
Amm_Epi_LBA_1	132_1_lys1_ex3_L1	0.132485
Amm_Epi_LBA_1	132_1_lys1_ex3_L2	0.163934
Amm_Epi_LBA_1	132_1_lys1_ex2_L1	0.186983
Amm_Epi_LBA_2	133_1_lys1_ex3_L1	0.091207
Amm_Epi_LBA_2	133_1_lys1_ex3_L2	0.0917431
Amm_Epi_LBA_2	133_1_lys1_ex2_L1	0.135064
Amv_Epi_Arch_1	127_1_lys1_ex2_L1	0.244817
Amv_Epi_Arch_2	256_1_B_lys2_ex1_L2	0.54092	no USER treatment
Amv_Epi_Arch_3	299_B_lys1_ex1_L1	0.423011	no USER treatment
Amv_Epi_Archaic_to_Roman	7_2_lys2_ex2_L1	0.0996169
Amv_Epi_Cl_1	126_1_lys1_ex2_L1	0.229607
Amv_Epi_Cl_2	128_2_lys2_ex2_L1	0.278628
Amv_Epi_Cl_3	131_1_lys1_ex2_L1	0.33226
Amv_Epi_Cl_4	136_1_lys1_ex2_L1	0.369748
Amv_Epi_Cl_5	139_lys1_ex2_L1	0.248943
Amv_Epi_Cl_6	140_lys1_ex2_L1	0.173469
Amv_Epi_Hel_1	14_3_lys1_ex2_L1	0.238548
Amv_Epi_Hel_2	16_2_lys3_ex2_L1	0.117475
Amv_Epi_Hel_3	8_1_lys1_ex2_L1	0.255107
Amv_Epi_Hel_4	9_1_lys1_ex2_L1	0.217499
Amv_Epi_Hel_5	13_1_lys3_ex2_L1	0.263808
Ten_Pel_Arch_1	160_lys1_ex2_L1	0.25027
Ten_Pel_Arch_2	165_lys2_ex1_L2	0.136285
Ten_Pel_Hel_1	162_lys1_ex1_L2	0.0773558
Ten_Pel_Hel_2	163_lys1_ex2_L1	0.122567
Ten_Pel_LHellenisticERoman	156_lys1_ex2_L1	0.278322
Ten_Pel_Rom_1	152_lys1_ex2_L1	0.160859
Ten_Pel_Rom_2	153_lys1_ex1_L2	0.10444
Ten_Pel_Rom_3	154_lys1_ex1_L2	0.195431
Ten_Pel_Rom_4	161_lys1_ex2_L1	0.283358

## Sheet: Contamination
Individual ID	Percentage of authentic mitochondrial reads ContamMix	ContamMix error rate	schmutzi (mtcont) average estimate	schmutzi (mtcont) lower - upper estimates	ANGSD contamination estimate (Method1 - new_llh version - ML)	Standard Error of ANGSD contamination estimate (Method1 - new_llh version - ML)
Amm_Epi_LBA_1	0.999402	0.0004	predC/nopredC: 0%	predC: 0-1%	female	female
Amm_Epi_LBA_2	0.999283	0.0004	predC/nopredC: 1%	predC: 0-2%	0.008207	0.000927838
Amv_Epi_Arch_1	0.998065	0.0005	predC/nopredC: 0%	predC: 0-1%	female	female
Amv_Epi_Arch_2	0.984921	0.0164	predC/nopredC: 2%	predC: 1-3%	female	female
Amv_Epi_Arch_3	0.973527	0.0127	predC/nopredC: 2%	predC: 1-3%	female	female
Amv_Epi_Archaic_to_Roman	0.99966	0.0008	predC/nopredC: 1%	predC: 0-2%	0.006447	0.0041392
Amv_Epi_Cl_1	0.999026	0.0006	predC/nopredC: 1%	predC: 0-2%	female	female
Amv_Epi_Cl_2	0.99938	0.0008	predC/nopredC: 1%	predC: 0-2%	0.016219	0.00646665
Amv_Epi_Cl_3	0.988639	0.0009	predC: low mtDNA coverage nopredC: 1%	predC: low mtDNA coverage nopredC: 0-3%	female	female
Amv_Epi_Cl_4	0.999598	0.0006	predC/nopredC: 1%	predC: 0-2%	0.003534	0.00149818
Amv_Epi_Cl_5	0.998911	0.0006	predC/nopredC: 1%	predC: 0-2%	female	female
Amv_Epi_Cl_6	0.999466	0.0006	predC/nopredC: 1%	predC: 0-2%	female	female
Amv_Epi_Hel_1	0.999612	0.0006	predC/nopredC: 1%	predC: 0-2%	female	female
Amv_Epi_Hel_2	0.997804	0.0007	predC/nopredC: 1%	predC: 0-2%	0	6.02994e-17
Amv_Epi_Hel_3	0.998041	0.0007	predC/nopredC: 1%	predC: 0-2%	female	female
Amv_Epi_Hel_4	0.998696	0.0005	predC/nopredC: 1%	predC: 0-2%	female	female
Amv_Epi_Hel_5	0.996079	0.0023	predC/nopredC: 1%	predC: 0-2%	female	female
Ten_Pel_Arch_1	0.994587	0.0007	predC: 3% nopredC: 4%	predC: 2-4% nopredC: 3-5%	0.005641	0.00162183
Ten_Pel_Arch_2	0.975683	0.0005	predC/nopredC: 4%	predC: 3-5% nopredC: 3-5%	female	female
Ten_Pel_Hel_1	0.999901	0.0004	predC: invalid result nopredC: 0%	predC: invalid result nopredC: 0-1%	female	female
Ten_Pel_Hel_2	0.998373	0.0006	predC: 1%	predC: 0-2%	0.003839	0.00219801
Ten_Pel_LHellenisticERoman	0.998172	0.0006	predC/nopredC: 1%	predC: 0-2%	female	female
Ten_Pel_Rom_1	0.997575	0.0005	predC: 1%	predC: 0-2%	female	female
Ten_Pel_Rom_2	0.998913	0.0004	predC: 1%	predC: 0-2%	0.005322	0.00082952
Ten_Pel_Rom_3	0.992848	0.0004	predC: 1%	predC: 0-2%	0.006317	0.00133696
Ten_Pel_Rom_4	0.994917	0.0002	predC: 1%	predC: 0-2%	female	female

## Sheet: Genetic Sex
Individual ID	Genetic sex / Sex chromosomes karyotype (Rx method / Ry method / karyo_RxRy method)	Rx value (Rx_method)	Rx 95% confidence interval (Rx_method)	Ry value (Ry_method)	Ry 95% confidence interval (Ry_method)	R13 value* (karyo_Rx_Ry method)	R13 standard error (karyo_RxRy method)	R18 value** (karyo_Rx_Ry method)	R18 standard error (karyo_RxRy method)	R21 value*** (karyo_Rx_Ry method)	R21 standard error (karyo_RxRy method)
Amm_Epi_LBA_1	XX / XX / XX	0.999272	0.898-1.103	0.0005	0.0004-0.0005	0.0394814	1.07337e-05	0.0311375	9.57354e-06	0.0142523	6.53318e-06
Amm_Epi_LBA_2	XY / Not Assigned / XY	0.509803	0.455-0.564	0.0745	0.0742-0.0747	0.0396635	1.83022e-05	0.0311727	1.62969e-05	0.0141504	1.10761e-05
Amv_Epi_Arch_1	XX / XX / XX	1.0226	0.894-1.151	0.0004	0.0004-0.0004	0.0409465	1.41186e-05	0.0317056	1.24834e-05	0.0141936	8.42758e-06
Amv_Epi_Arch_2	XX / XX / XX	1.09175	0.934-1.249	0.0005	0.0005-0.0006	0.0418789	3.37792e-05	0.0322546	2.97933e-05	0.0142793	2.00066e-05
Amv_Epi_Arch_3	XX / XX / XX	1.01739	0.898-1.137	0.0005	0.0004-0.0005	0.0404006	3.1276e-05	0.0314651	2.77296e-05	0.0141937	1.87895e-05
Amv_Epi_Archaic_to_Roman	XY / XY /XY	0.527903	0.460-0.596	0.0762	0.0755-0.0769	0.0410009	4.53761e-05	0.0315148	3.99784e-05	0.0141456	2.70233e-05
Amv_Epi_Cl_1	XX / XX / XX	1.02355	0.894-1.153	0.0004	0.0004-0.0005	0.0410516	1.9716e-05	0.0317181	1.74145e-05	0.0142049	1.1759e-05
Amv_Epi_Cl_2	XY / Not Assigned / XY	0.536257	0.449-0.623	0.0733	0.0726-0.074	0.042825	4.80952e-05	0.03226	4.19729e-05	0.014233	2.8138e-05
Amv_Epi_Cl_3	XX / XX / XX	1.03793	0.885-1.191	0.0007	0.0006-0.0008	0.0419791	9.21139e-05	0.0322043	8.10906e-05	0.0142066	5.43575e-05
Amv_Epi_Cl_4	XY / Not Assigned / XY	0.524603	0.450-0.599	0.0719	0.0715-0.0723	0.0419315	2.89159e-05	0.0320226	2.53998e-05	0.0142855	1.71195e-05
Amv_Epi_Cl_5	XX / XX / XX	1.01955	0.894-1.145	0.0005	0.0004-0.0005	0.0408457	2.84054e-05	0.0317447	2.51602e-05	0.0142579	1.70135e-05
Amv_Epi_Cl_6	XX / XX / XX	1.01356	0.893-1.134	0.0005	0.0004-0.0005	0.0406663	2.07781e-05	0.0316176	1.84074e-05	0.0141969	1.2445e-05
Amv_Epi_Hel_1	XX / XX / XX	1.06698	0.904-1.230	0.0006	0.0006-0.0007	0.0423477	4.89272e-05	0.032196	4.2887e-05	0.01422	2.87654e-05
Amv_Epi_Hel_2	XY / consistent with XY but not XX / XY	0.525064	0.462-0.588	0.0755	0.074-0.077	0.0409562	0.000104122	0.031656	9.19824e-05	0.0142672	6.23032e-05
Amv_Epi_Hel_3	XX / XX / XX	1.0251	0.892-1.158	0.0004	0.0004-0.0005	0.0412275	3.17667e-05	0.0317098	2.79976e-05	0.0142383	1.89294e-05
Amv_Epi_Hel_4	XX / XX / XX	1.01998	0.897-1.143	0.0004	0.0004-0.0005	0.0406655	1.94898e-05	0.0315312	1.72434e-05	0.0141563	1.1657e-05
Amv_Epi_Hel_5	XX / XX / XX	1.06652	0.855-1.277	0.0004	0.0003-0.0004	0.0442777	6.45556e-05	0.0329122	5.5987e-05	0.0143522	3.73246e-05
Ten_Pel_Arch_1	XY / XY /XY	0.539605	0.461-0.618	0.0758	0.0754-0.0763	0.0418304	3.17275e-05	0.0319001	2.785e-05	0.0142179	1.87619e-05
Ten_Pel_Arch_2	XX / XX / XX	1.06422	0.924-1.204	0.0006	0.0006-0.0006	0.041144	2.64546e-05	0.0314417	2.32428e-05	0.0142109	1.57643e-05
Ten_Pel_Hel_1	XX / XX / XX	1.00474	0.908-1.101	0.0006	0.0006-0.0006	0.0385464	3.00026e-05	0.0305668	2.68279e-05	0.0142033	1.84413e-05
Ten_Pel_Hel_2	XY / XY /XY	0.51979	0.4605-0.579	0.0759	0.0753-0.0764	0.0403483	3.8586e-05	0.0313131	3.41519e-05	0.0142776	2.32629e-05
Ten_Pel_LHellenisticERoman	XX / XX / XX	1.02053	0.894-1.147	0.0004	0.0004-0.0004	0.0408172	2.25573e-05	0.0316564	1.996e-05	0.0141913	1.34842e-05
Ten_Pel_Rom_1	XX / XX / XX	0.997122	0.894-1.100	0.0005	0.0005-0.0005	0.0395781	2.36591e-05	0.0310893	2.10614e-05	0.0141763	1.43457e-05
Ten_Pel_Rom_2	XY / XY /XY	0.50976	0.460-0.560	0.0786	0.0783-0.0789	0.0388676	2.20728e-05	0.0307943	1.97294e-05	0.0142274	1.35245e-05
Ten_Pel_Rom_3	XY / consistent with XY but not XX / XY	0.507218	0.452-0.562	0.0753	0.0749-0.0756	0.0397196	2.455e-05	0.031155	2.18394e-05	0.0141653	1.48547e-05
Ten_Pel_Rom_4	XX / XX / XX	1.04515	0.886-1.204	0.0005	0.0004-0.0005	0.0423081	7.57605e-05	0.0322054	6.64468e-05	0.0142974	4.46806e-05
						* Estimates higher than 0.065 indicate the presence of an additional copy of chromosome 13
						** Estimates higher than 0.045 indicate the presence of an additional copy of chromosome 18
						*** Estimates higher than 0.020 indicate the presence of an additional copy of chromosome 21

## Sheet: Haplogroups
Individual ID	Haplogroup mtDNA (Haplogrep3 / HaploCart)	Haplogroup mtDNA quality (Haplogrep3) / posterior probability (HaploCart)	Major Haplogroup Y - Y-Chromosome Consortium nomenclature (Yleaf/Yhaplo) [The values in square brackets correspond to the number of observed derived genotypes]	Haplogroup Y Name of represenative SNP and/or Y-Chromosome Consortium nomenclature (Yleaf/Yhaplo) [The values in square brackets correspond either to the prediction score for Yleaf or to the number of observed derived genotypes]
Amm_Epi_LBA_1	J1c2 / J1c	0.91 / 1.00	Female	Female
Amm_Epi_LBA_2	T2b3 / T2b3	0.91 / 1.00	G [226] / G [210]	G-Z724 [1.00] / G2a2b2a1a1c1a [1]
Amv_Epi_Arch_1	H15a1b / H15a1b	0.80 / 1.00	Female	Female
Amv_Epi_Arch_2	T1a4 / T1a4	0.91 / 1.00	Female	Female
Amv_Epi_Arch_3	U5a1g1 / U5a1g1	0.81 / 1.00	Female	Female
Amv_Epi_Archaic_to_Roman	W6 / W6	0.92 / 1.00	R1 [38] / R1 [10]	R-PF7562 [1.00] / R1b1a2b [1]
Amv_Epi_Cl_1	N1a1a1b / N1a1a1	0.78 / 1.00	Female	Female
Amv_Epi_Cl_2	H / H104 (H)*	0.71 / 0.02 (0.98)*	J [44] / J [10]	J-L283 [1.00] / J2 [1]
Amv_Epi_Cl_3	T2b6 / T2b3c	0.79 / 1.00	Female	Female
Amv_Epi_Cl_4	H / H104 (H)*	0.84 / 0.03 (0.97)*	T [60] / T [24]	T-S27463 [1.00] / T1a2 [1]
Amv_Epi_Cl_5	K1a2 / K1a2	0.92 / 1.00	Female	Female
Amv_Epi_Cl_6	K1a2 / K1a2	0.92 / 1.00	Female	Female
Amv_Epi_Hel_1	H46 / H46	0.73 / 1.00	Female	Female
Amv_Epi_Hel_2	J2b1a / J2b1a (J2b1)*	0.98 / 0.33 (1.00)*	E [14] / E [10]	E-M78 [1.00] / E1b1b1 [4]
Amv_Epi_Hel_3	W+194 / W9	0.87 / 1.00	Female	Female
Amv_Epi_Hel_4	W+194 / W9	0.91 / 1.00	Female	Female
Amv_Epi_Hel_5	H5a3a / H5a3 (H5a)*	0.71 / 0.5 (1.00)*	Female	Female
Ten_Pel_Arch_1	T1a4 / T1a4	0.90 / 1.00	T [68] / T [32]	T-S27463 [1.00] / T1a2 [2]
Ten_Pel_Arch_2	T1a4 / T1a4	0.94 / 1.00	Female	Female
Ten_Pel_Hel_1	U3a3 / U3a3	0.96 / 1.00	Female	Female
Ten_Pel_Hel_2	T2n / T2n	0.90 / 1.00	E [125] / E [60]	E-CTS9320 [1.00] / E1b1b1a1b1 [2]
Ten_Pel_LHellenisticERoman	U5a1c / U5a1c	0.82 / 1.00	Female	Female
Ten_Pel_Rom_1	N1a1a+152 / N1a1a2	0.84 / 1.00	Female	Female
Ten_Pel_Rom_2	N1a1a+152 / N1a1a2	0.91 / 1.00	R1 [148] / R1 [50]	R-Y13369 [1.00] / R1b1a2a2a [1]
Ten_Pel_Rom_3	N1a1a+152 / N1a1a2	0.80 / 1.00	J [106] / J [47]	J-Z504 [1.00] / J2a1b1 [2]
Ten_Pel_Rom_4	U1a1c1 / U1a1c1 (U1a1c)	0.96 / 0.5 (1.00)*	Female	Female
	* In brackets we report the second best assignment that has posterior probability > 0.97
